# Supplementary material for: Polycomb group ring finger protein 6 suppresses Myc-induced lymphomagenesis
Source: Life Sci Alliance. 2022 Apr 14;5(8):e202101344. doi: 10.26508/lsa.202101344 (PMC9012912; doi:10.26508/lsa.202101344)
Supplement: Supplementary file 5 [file LSA-2021-01344_TableS4.xlsx]

## Sheet: Legend
Supplemental Table S4. Differentially Expressed Genes (DEGs) called in this work. The first spreadsheet (A. All DESeq2) shows DESeq2 calculations of log2FC and padj for all genes, in each of the indicated pairwise comparisons (Sample pairs). Samples names as as defined in Figure 3. The remaining spreadsheets (B-F) show the DEGs called in the indicated pairwise comparison (padj<0.05 and |log2FC>0.…

## Sheet: (A) All_DESeq2
Sample pairs ->	C-KO vs C-WT		P-KO vs P-WT		P-WT vs C-WT		P-KO vs C-WT		P-KO vs C-WT
GeneSymbol	log2FoldChange	padj	log2FoldChange	padj	log2FoldChange	padj	log2FoldChange	padj	log2FoldChange	padj
0610007P14Rik	-0.197775	0.999992	-0.051788	0.999639	0.35044	0.11924	0.24545	0.486238	-0.346236	0.501179
0610009B22Rik	-0.0104255		0.127683	0.999639	1.59618	0.000779858	1.86201	0.000684153	-0.529008	0.481083
0610009O20Rik	0.0915173	0.999992	-0.0639653	0.999639	0.148971	0.439485	0.0280945	0.920163	0.461523	0.447317
0610010B08Rik	0.0393383	0.999992	0.295074	0.999639	0.069019	0.8812	0.807156	0.110421	-0.709223	0.2374
0610010F05Rik	-0.00620169	0.999992	0.095876	0.999639	0.904696	0.000475786	1.03349	0.00959629	0.0175784	0.986673
0610010K14Rik	-0.0584788	0.999992	0.0333496	0.999639	1.07606	1.77074e-05	1.09423	2.4587e-05	0.0446938	0.957434
0610011F06Rik	-0.129127	0.999992	-0.0369873	0.999639	0.625317	0.00232872	0.546522	0.00747503	0.123685	0.8469
0610012G03Rik	-0.125813	0.999992	-0.0212237	0.999639	0.822772	7.92364e-05	0.763938	0.00297122	-0.0584222	0.943796
0610030E20Rik	-0.0571099	0.999992	-0.0276529	0.999639	-0.284334	0.14518	-0.350875	0.104991	-0.0613933	0.92569
0610037L13Rik	-0.0914908	0.999992	0.110973	0.999639	-0.201912	0.454198	-0.0698333	0.825383	-0.158063	0.777867
0610038B21Rik	0.084091	0.999992	0.130063	0.999639	-0.554474	0.310396	-0.21347	0.680118	-0.304622	0.824914
0610039K10Rik	-0.0121068	0.999992	0.116782	0.999639	-0.794365	0.000222141	-0.660421	0.00845321	0.397301	0.666353
0610040B10Rik	0.118047		0.0246911	0.999639	0.701204	0.407329	0.900061	0.275332	-0.118236
0610040J01Rik	-0.00294751		-0.0178598	0.999639	-0.558814	0.52253	-0.764105	0.389212	0.465662
1110001J03Rik	-0.1195	0.999992	0.0892317	0.999639	1.04071	0.0033316	1.16816	0.00191718	-0.100524	0.928251
1110002L01Rik	-0.0305779	0.999992	-0.242343	0.999639	0.31193	0.311453	-0.118795	0.775284	0.0554707	0.961928
1110004E09Rik	-0.10264	0.999992	0.0172035	0.999639	1.65019	2.48375e-05	1.66842	1.18785e-05	0.0710513	0.941241
1110004F10Rik	-0.0968137	0.999992	0.0187711	0.999639	0.986196	7.41199e-06	0.975665	0.000387893	-0.161441	0.847806
1110006O24Rik	-0.0289546		0.0312145	0.999639	-0.0377941	0.963782	0.0671504	0.938052	-0.171536
1110007C09Rik	0.0462497	0.999992	0.236981	0.999639	-0.670237	0.138006	-0.114818	0.819177	-0.392954	0.74592
1110008F13Rik	-0.0509487	0.999992	-0.132215	0.999639	0.961381	2.90686e-06	0.77161	0.000961375	0.0811811	0.938107
1110008L16Rik	0.200859	0.999992	-0.0716194	0.999639	0.820956	1.94834e-05	0.699105	0.00104881	0.161159	0.780593
1110008P14Rik	-0.00131279	0.999992	-0.01815	0.999639	-0.427795	0.180816	-0.489891	0.12565	-0.256151	0.7386
1110012L19Rik	-0.135041	0.999992	0.160278	0.999639	0.261845	0.562193	0.57011	0.182647	-0.442747	0.598638
1110017D15Rik	-0.000521027		0.00798188	0.999639	-0.408138		-0.325423		-0.126157
1110020A21Rik	-0.0470499		0.0173894	0.999639	-0.149268	0.859821	-0.0843317	0.922726	0.157628
1110032A03Rik	-0.00284832	0.999992	-0.0702296	0.999639	-0.252798	0.517157	-0.429029	0.212769	-0.934383	0.189473
1110032F04Rik	0.0170944		0.0673313	0.999639	2.1755	0.0041928	2.48941	0.00138012	-0.044589
1110034G24Rik	-0.196675	0.999992	-0.0458731	0.999639	-0.293108	0.3914	-0.405975	0.237652	-0.0348662	0.97465
1110037F02Rik	-0.0282591	0.999992	-0.0169286	0.999639	0.218513	0.0692562	0.167297	0.255748	0.0222466	0.974433
1110038B12Rik	-0.0685925	0.999992	0.135968	0.999639	2.0425	1.80019e-22	2.1828	2.1947e-22	0.23576	0.654213
1110038F14Rik	0.00679209	0.999992	0.0411841	0.999639	0.464012	0.0630016	0.487328	0.0417738	0.324087	0.658247
1110051M20Rik	0.0146292	0.999992	-0.0197469	0.999639	-0.498892	0.0299011	-0.558857	0.0497822	-0.119607	0.89307
1110057K04Rik	-0.00278911	0.999992	-0.0892488	0.999639	0.393077	0.00626845	0.260179	0.122143	0.0803826	0.914791
1110058L19Rik	-0.142248	0.999992	0.0174754	0.999639	0.736924	0.0542042	0.717644	0.198769	-0.385936	0.634832
1110059E24Rik	0.00527194	0.999992	0.213026	0.999639	0.0365199	0.863179	0.405958	0.311983	-0.690459	0.0712578
1110059G10Rik	-0.0737472	0.999992	-0.0411369	0.999639	0.137669	0.694997	0.0320736	0.951203	-0.327803	0.729486
1110065P20Rik	-0.0528069		-0.000150107	0.999639	0.973206	0.0383043	0.947649	0.0469502	0.0769217	0.945434
1190002N15Rik	-0.0538022	0.999992	0.115958	0.999639	0.733854	0.0153373	0.889233	0.00557363	0.0318924	0.97634
1190003K10Rik									-0.159387
1190005I06Rik	-0.0280421		0.0334374	0.999639	-0.459941		-0.124591		-0.286683
1190007I07Rik	-0.0949467	0.999992	-0.114224	0.999639	1.28755	2.64928e-05	1.09471	0.000738528	0.17537	0.841482
1200014J11Rik	0.0830608	0.999992	-0.155593	0.999639	0.15664	0.292809	-0.0545872	0.777136	-0.0321489	0.950539
1300017J02Rik	0.00151258		0.0161192	0.999639	0.0963421		0.278756		-0.0831898
1500004A13Rik	0.051151	0.999992	-0.149233	0.999639	-0.45257	0.0415215	-0.704557	0.00393389	-0.243847	0.72695
1500009C09Rik	0.0206427		-0.0613787	0.999639	0.331265	0.718612	-0.361601		-0.258354
1500009L16Rik			0.0917121	0.999639			1.25904		-0.279731
1500011B03Rik	-0.0271822	0.999992	0.00209062	0.999639	-0.203848	0.453015	-0.23121	0.426047	-0.139733	0.866202
1500011K16Rik	-0.0239079	0.999992	0.0321372	0.999639	1.35598	3.43091e-05	1.36134	0.000988331	-0.482111	0.419089
1500012F01Rik	-0.158566	0.999992	0.244988	0.999639	1.06149	5.9398e-08	1.35005	8.82895e-08	0.0414928	0.960068
1500015A07Rik	0.0152293	0.999992	-0.191668	0.999639	0.036115	0.938839	-0.42652	0.371265	-0.372648	0.671377
1500015O10Rik	0.0167721		-0.046325	0.999639	-0.0823597	0.934043	-0.663954		-0.434253
1500017E21Rik	0.0402104		0.0327012	0.999639	-0.0733525	0.931721	0.0441923	0.958601	-0.0501305	0.974433
1600002H07Rik	-0.0391646	0.999992	-0.234553	0.999639	0.789352	0.00135103	0.420468	0.145313	0.313596	0.68883
1600002K03Rik	-0.133805	0.999992	-0.14834	0.999639	0.315525	0.399087	0.0203878	0.963118	-0.0182976	0.98551
1600012H06Rik	-0.00110112	0.999992	0.0507738	0.999639	-0.623261	0.00359035	-0.58473	0.00824918	-0.546813	0.287888
1600014C10Rik	-0.0584639	0.999992	-0.110753	0.999639	0.245753	0.321497	0.0615276	0.812554	-0.171428	0.867204
1600014K23Rik
1600015I10Rik	0.0122276								-0.100072
1600029I14Rik	-0.0290245		0.0419371	0.999639	-1.084	0.19308	-0.680337	0.424791	-0.193828
1600029O15Rik	0.0686209	0.999992	0.0709365	0.999639	-0.415741	0.525924	-0.160283	0.832019	0.622453	0.547176
1700001C02Rik									-0.0281232
1700001C19Rik	-0.00797549		0.0135707	0.999639	-0.280203		-0.012609		-0.254173
1700001F09Rik									-0.0111582
1700001G17Rik	0.0557244		0.100512	0.999639	-0.0991146	0.905593	0.321572	0.66648	0.2974
1700001J03Rik	0.035326		0.00326363	0.999639	-0.218949		-0.230749		0.0580738
1700001J11Rik	0.0723731	0.999992	0.0784584	0.999639	-0.929084	0.124299	-0.667502	0.248229	-0.543472
1700001K19Rik	-0.0228843	0.999992	0.0386048	0.999639	-1.00909	0.0692562	-0.859974	0.151782	-0.0071556
1700001K23Rik	0.0328557	0.999992	0.0847095	0.999639	-1.71276	1.52692e-05	-1.49002	4.82088e-05	0.134101
1700001L05Rik	0.111201	0.999992	0.162802	0.999639	-0.0427673	0.907941	0.205587	0.562616	0.832532	0.354574
1700001L19Rik	-0.00926071		0.00798188	0.999639	-0.0729188		0.0531246
1700001O22Rik	0.0163444		0.0552462	0.999639	1.28441		1.58238		0.0917658	0.956166
1700001P01Rik	0.00838237		-0.168963	0.999639	0.895824	0.21493	-0.0269328	0.979587	-0.212371
1700003E16Rik	-0.00822279		-0.0111212	0.999639	-0.0357932		-0.259633		-0.251036
1700003F12Rik	0.0122503		-0.00296925	0.999639	0.656404	0.409954	0.617363	0.454496	0.441972	0.723451
1700003G18Rik	-0.00822279		-0.0232536	0.999639	0.14038		-0.259633		-0.0138595
1700003H04Rik
1700003M02Rik	-0.00926071		0.0736056	0.999639	-0.318149		0.663348		-0.352794
1700006A11Rik									-0.211557
1700006E09Rik									-0.159387
1700007B14Rik			0.0139419	0.999639			0.250342		-0.211557
1700007G11Rik	0.00407984		-0.0104119	0.999639	-0.0535767		-0.259633		0.00400082
1700007K09Rik	0.0271347		0.0215423	0.999639	0.226023		0.567384		-0.322827
1700007K13Rik			-0.0104119	0.999639	0.214265				-0.102625
1700008F21Rik	-0.0687784	0.999992	0.0829725	0.999639	0.623386	0.152035	0.802718	0.116274	0.0359673	0.971227
1700008I05Rik									-0.159387
1700008J07Rik	0.0638367	0.999992	-0.0057601	0.999639	-0.441986	0.230346	-0.483701	0.237284	0.505175	0.521045
1700008O03Rik	0.00622305		-0.0271908	0.999639	0.266802		-0.00397623		0.140836
1700008P02Rik			0.0139419	0.999639			0.250342		-0.341717
1700009J07Rik	0.00482041		0.0135707	0.999639	-0.475666		-0.295016		-0.209062
1700009N14Rik									-0.163885
1700010B08Rik			0.0135707	0.999639			0.24385
1700010D01Rik			-0.015519	0.999639	0.28738				-0.195882
1700010I14Rik	-0.0154345	0.999992	-0.167607	0.999639	0.00943664	0.984495	-0.381182	0.31621	0.964195	0.182565
1700011A15Rik	0.00766811		0.0163751	0.999639			0.289781		-0.154879
1700011E24Rik	0.0376377		0.073917	0.999639	-1.45778	0.0678333	-0.736734	0.381337	-0.834831
1700011H14Rik	0.00285262		-0.0241158	0.999639	-0.23576		-0.440996		-0.271538
1700011I03Rik	-0.0115184		-0.0116625	0.999639	-0.358503		-0.633099		0.176743
1700011L22Rik			-0.0130341	0.999639	0.370551		0.231711		-0.136166
1700012A03Rik
1700012B07Rik	0.00741789								-0.00750874
1700012B09Rik									-0.271282
1700012D14Rik	0.0194164	0.999992	0.106536	0.999639	-0.34124	0.292809	-0.188099	0.589651	-0.221359	0.810408
1700012L04Rik	-0.00504427		-0.00519406	0.999639	-0.117386	0.903989	-0.198081		0.435664
1700012P22Rik	-0.0135697				-0.475666		-0.525365		-0.102625
1700013D24Rik									-0.102625
1700013F07Rik	0.0078276		0.0130379	0.999639			0.231711		-0.10944
1700013G24Rik			0.0135707	0.999639			0.24385
1700013H16Rik	0.0078276								-0.272626
1700015E13Rik	0.00599871		0.0130379	0.999639	-0.28926		-0.0482884		0.21227
1700015F17Rik			0.0139419	0.999639			0.250342		-0.159387
1700016C15Rik	-0.0686778		-0.0390478	0.999639	-0.142818	0.872379	-0.458356	0.606531	0.00923872
1700016D06Rik	0.0186566	0.999992	-0.122256	0.999639	-0.185688	0.782374	-0.746676	0.226256	-0.826411	0.329775
1700016H13Rik			-0.0104119	0.999639	0.214265				-0.11894
1700016K19Rik	-0.00737984		-0.0323409	0.999639	0.547252		0.184229		0.0567772
1700017B05Rik	0.00208783	0.999992	-0.0189509	0.999639	0.941805	1.82361e-10	0.880411	1.86664e-06	0.214521	0.695749
1700017D01Rik	0.00766811								-0.275306
1700017N19Rik	-0.00926071		-0.0104119	0.999639	-0.110593		-0.293793		-0.247312
1700018A04Rik	0.0138332		0.0424763	0.999639	-0.318149		0.368218		-0.465637	0.711788
1700018A14Rik	-0.00851142		-0.00183371	0.999639	0.405661		0.394017		-0.155632
1700018B08Rik			-0.0104119	0.999639	0.214265				-0.159387
1700018B24Rik									-0.102625
1700018C11Rik	-0.00162207		0.00383506	0.999639	0.0478029		0.10182		-0.154879
1700018F24Rik
1700018L02Rik	0.00353273		0.0259343	0.999639	0.405077	0.649661	0.564167	0.523171	0.185455
1700019A02Rik	-0.0120718		0.00912478	0.999639	-0.647505	0.456495	-0.45405		-0.42006
1700019B03Rik	0.00764572		0.0119789	0.999639	-0.278774		-0.0604269		-0.393431
1700019D03Rik	-0.00496163		0.0621148	0.999639	-0.979713	0.163363	-0.69859	0.31067	-0.359599
1700019G17Rik	0.0458647	0.999992	0.0115297	0.999639	-0.620841	0.0816467	-0.635461	0.0943515	-0.112666	0.933556
1700019L03Rik	0.0569204		-0.0826406	0.999639	0.244228	0.765234	-0.298771	0.733934	-0.245736
1700019M22Rik
1700019N19Rik									-0.163885
1700019O17Rik			0.0254085	0.999639	0.347533		0.828363
1700020A23Rik	-0.0156892		0.004307	0.999639	-0.0621266		-0.03514		-0.398314
1700020D05Rik	0.0690366	0.999992	0.0817325	0.999639	-1.91281	4.49606e-05	-1.6379	0.000184075	-0.158581
1700020I14Rik	-0.0454955	0.999992	0.126084	0.999639	-0.0911046	0.618358	0.038065	0.88316	-0.249704	0.673822
1700020L24Rik	-0.0219425		-0.0323162	0.999639	0.470514	0.601022	0.195274		-0.387609
1700020N01Rik									-0.188595
1700020N18Rik	-0.069314		-0.0284606	0.999639	-0.802551	0.325938	-1.10524		-0.0807744
1700021F05Rik	-0.023731	0.999992	0.106674	0.999639	1.1823	0.00549283	1.38504	0.000285595	0.233657	0.789937
1700021F07Rik									-0.102625
1700021K19Rik	0.136847	0.999992	0.0390024	0.999639	-0.684562	2.07019e-14	-0.656307	0.00331618	-0.442773	0.421155
1700022A21Rik	-0.00926071				-0.318149		-0.293793		-0.102625
1700022I11Rik	0.03962		0.104823	0.999639	-1.26882	0.0730576	-0.599359	0.415865	-0.102299
1700023E05Rik	0.00741789		-0.00183944	0.999639	0.319138		0.331664		-0.185007
1700024G13Rik
1700024P04Rik
1700024P16Rik	0.0129022		0.0183085	0.999639			0.308003		-0.878626
1700025C18Rik	0.00645832		-0.00113986	0.999639	-0.0729188		-0.10698		-0.0807744
1700025F22Rik									-0.220596
1700025G04Rik	-0.014583	0.999992	-0.260839	0.999639	0.208242	0.66459	-0.373109	0.455329	-1.54218	0.014147
1700026D08Rik	0.00766811								-0.14645
1700026D11Rik	-0.0120958		0.106122	0.999639	0.277751	0.745505	0.912338	0.22811	-0.0318956
1700026L06Rik	0.0254141	0.999992	0.0280387	0.999639	-0.690963	0.302007	-0.5825	0.392765	-1.31875
1700028B04Rik
1700028J19Rik	0.00153288		-0.0172974	0.999639	1.22018	0.131314	1.20821	0.148842	-0.0370585
1700028K03Rik	0.0709542	0.999992	-0.147812	0.999639	-0.314817	0.555709	-0.852113	0.098041	-0.434852	0.713535
1700028M03Rik									-0.102625
1700028P14Rik			0.0250508	0.999639			0.420373		-0.163885
1700029F12Rik	0.0152878				-0.280203		-0.250805		-0.188151
1700029H14Rik	0.0254051	0.999992	0.0314644	0.999639	-1.60554	0.00980277	-1.4908	0.0151623	-0.159999
1700029I15Rik	0.0567776		-0.100287	0.999639	0.0077773	0.993542	-0.539036	0.522508	0.191898
1700029J07Rik	0.0605447	0.999992	-0.0969242	0.999639	-0.696692	0.0657036	-0.966402	0.0537846	-0.53814	0.579101
1700029M20Rik	0.0185071		-0.0272777	0.999639	0.227953		-0.0696553		-0.0202437
1700029P11Rik	0.00830743								-0.17956
1700030C10Rik	-0.0775994		0.0922145	0.999639	-0.870464	0.219714	-0.487262	0.510001	0.763096
1700030F18Rik
1700030J22Rik	0.00601096		0.0607946	0.999639	1.22863	0.124835	1.56961	0.0455509	0.0970461
1700030K09Rik	-0.0133171	0.999992	-0.162737	0.999639	0.315182	0.322446	-0.0169812	0.953399	0.231658	0.79469
1700031F05Rik									-0.217528
1700031M16Rik			0.0130379	0.999639			0.231711		-0.265363
1700034E13Rik
1700034H15Rik	0.0574238	0.999992	0.0647233	0.999639	-0.556463	0.289073	-0.424388	0.392424	-0.20123	0.879847
1700034I23Rik	-0.0315688		0.085809	0.999639	-1.88745	0.0137628	-1.13585	0.110967	-0.545574
1700034J05Rik	-0.0485179		0.00786426	0.999639	-1.34427	0.0917389	-1.37061	0.0839467	-1.08595
1700034O15Rik									-0.202828
1700037C18Rik	0.000265842	0.999992	-0.178271	0.999639	-0.355278	0.216411	-0.668227	0.0179377	-0.127506	0.89384
1700037H04Rik	-0.030503	0.999992	-0.195224	0.999639	1.73376	1.55084e-13	1.44358	8.47951e-10	0.329806	0.617862
1700039E15Rik	0.00678547		0.00715487	0.999639	0.088831		0.122221		-0.668917
1700040L02Rik	-0.019074		0.0538278	0.999639	0.373588	0.610578	0.553019	0.428506	-0.0404313
1700041C23Rik									-0.102625
1700042B14Rik
1700042G07Rik
1700044K03Rik	0.00807885		-0.00855893	0.999639	-0.129744		-0.277935		-0.121915
1700047I17Rik2
1700047M11Rik	9.44981e-05		0.00085654	0.999639	-0.287923		-0.306768		-0.0584491
1700048O20Rik	0.0827708	0.999992	0.0971062	0.999639	-0.566356	0.165931	-0.39766	0.363058	0.626178
1700049E15Rik									-0.117421
1700049G17Rik	0.0675182	0.999992	0.167549	0.999639	-0.464999	0.0577558	-0.258329	0.337651	-0.751857	0.139258
1700049L16Rik
1700052I22Rik			0.0139419	0.999639			0.250342
1700052K11Rik	0.0262651	0.999992	-0.00771876	0.999639	-0.0482515	0.896147	-0.0962468	0.79879	0.167546	0.853529
1700052N19Rik	0.0156749	0.999992	0.0118707	0.999639	-0.0283277	0.876925	-0.0445126	0.830874	-0.138814	0.797476
1700054K19Rik
1700056E22Rik	0.0572471	0.999992	0.0168166	0.999639	-0.955028	0.0927232	-0.894775	0.143006	-0.267727
1700057G04Rik	-0.0100875		-0.0713452	0.999639	-0.639178	0.413465	-1.30957	0.108923	-0.31394
1700060C20Rik									-0.102625
1700061G19Rik	0.0545084	0.999992	0.0838337	0.999639	-0.706603	0.263552	-0.431774	0.461666	-0.0764154
1700065D16Rik	-0.118967	0.999992	-0.141818	0.999639	0.103428	0.859918	-0.324854	0.543808	0.175334	0.886901
1700066B19Rik	-0.0383008		0.0605248	0.999639	-0.605073	0.388017	-0.35038	0.627058	0.308779	0.816077
1700066M21Rik	0.00280831	0.999992	0.0273513	0.999639	0.446271	0.0663978	0.463114	0.3041	-0.504311	0.445278
1700066O22Rik	-0.00813177		0.0135707	0.999639	-0.446996		-0.300109		-0.144167
1700067K01Rik	-0.033721	0.999992	-0.0375701	0.999639	0.0318804	0.958288	-0.0907272	0.880187	0.680447	0.431284
1700067P10Rik
1700069L16Rik	-0.00926071				-0.318149		-0.293793		-0.0807744
1700071K01Rik	0.0279539		0.0250349	0.999639	-0.110593		0.229683		0.0331997
1700073E17Rik	-0.00926071		0.0413236	0.999639	-0.318149		0.351		-0.178833
1700074P13Rik									-0.102625
1700080E11Rik									-0.10944
1700080O16Rik									-0.102625
1700084C01Rik	-0.00967665		0.000894748	0.999639	-1.23954		-1.20027		-0.118464
1700084E18Rik	0.00827727		0.0311823	0.999639	-0.0357279	0.969503	0.1123	0.907764	0.175449
1700084J12Rik	0.0525048		-0.0272777	0.999639	-0.0354991		-0.350681		-0.132765
1700086L19Rik
1700086O06Rik	0.00644618		0.0527437	0.999639	-0.00358301	0.996074	0.137009	0.851346	0.0716477	0.961928
1700088E04Rik	0.00830743		0.0130379	0.999639			0.231711		0.0542741
1700092M07Rik	-0.0104469		-0.0937902	0.999639	0.654261	0.309114	0.318771	0.648943	0.382991	0.75603
1700093K21Rik	0.00741789		0.0010091	0.999639	0.226023		0.24385		-0.250255
1700094D03Rik	0.104962	0.999992	0.138539	0.999639	-0.793715	0.000508358	-0.612286	0.00816124	-0.193051	0.836378
1700096J18Rik	-0.0600265		0.0433141	0.999639	-0.843949	0.315167	-0.575251	0.486338	-0.386382
1700096K18Rik	-0.025255	0.999992	0.0251562	0.999639	-0.593138	0.284294	-0.546167	0.319287	-0.336225
1700101E01Rik	0.0122466		-0.059129	0.999639	0.892861	0.282891	0.552956		0.313432
1700102P08Rik	-0.0230806	0.999992	-0.0999594	0.999639	-0.793875	0.146686	-1.20603	0.0243709	-0.202314
1700106J16Rik	-0.0120687				-0.461579		-0.422754
1700108F19Rik			0.0183085	0.999639			0.308003		-0.190909
1700108J01Rik	-0.0103678		0.00149131	0.999639	-0.162862	0.863669	-0.201723		0.185218
1700109G14Rik
1700109H08Rik	0.0156462	0.999992	-0.00169258	0.999639	-0.596746	0.0976185	-0.64461	0.0509425	-0.404969	0.653349
1700111N16Rik	0.00376065		0.0259873	0.999639	-0.484187		0.0204691		-0.38494
1700112E06Rik	-0.0132956		0.021531	0.999639	1.19488	0.0752077	1.29887	0.0419224	-0.772899
1700113H08Rik	-0.00797549				-0.280203		-0.250805		-0.17956
1700120K04Rik	-0.00031556		0.113664	0.999639	-0.396184	0.610881	0.0908941	0.906021	0.470225
1700121N20Rik									-0.102625
1700123I01Rik	-0.025204	0.999992	0.189871	0.999639	-1.61016	0.00534235	-0.795339	0.15668	-0.460845
1700123K08Rik
1700123L14Rik									-0.17956
1700123O20Rik	-0.12284	0.999992	-0.0450624	0.999639	0.434986	0.0146423	0.341457	0.20408	-0.273479	0.746823
1700125H20Rik	-0.00737984		-0.0104119	0.999639	-0.298967		-0.525365		-0.217528
1700128F08Rik	0.0583891	0.999992	0.06138	0.999639	-0.7579	0.0863463	-0.625374	0.168954	-0.335683	0.780593
1700129C05Rik			0.0179473	0.999639			0.331664		-0.196471
1810009A15Rik	-0.0965861	0.999992	-0.0180157	0.999639	0.795349	0.000669954	0.722539	0.0164623	0.227264	0.740238
1810009J06Rik	-0.0147273		0.0010091	0.999639	-0.799073		-0.87583		0.05312
1810010D01Rik	-0.0395414		0.0144698	0.999639	-0.61596		-0.53348		-0.435651
1810010H24Rik	0.117856	0.999992	0.0277504	0.999639	-0.514597	0.440042	-0.453018	0.490651	-0.367504
1810011H11Rik	0.0522682	0.999992	0.0388668	0.999639	-0.919358	0.1607	-0.74961	0.28554	-0.523427
1810011O10Rik	0.00492549		-0.0275519	0.999639	0.628738	0.461521	0.489577		-0.0725327
1810013L24Rik	0.0238443	0.999992	0.117938	0.999639	-0.363312	0.0789411	-0.215154	0.435244	-0.161477	0.770377
1810014B01Rik	-0.0356333	0.999992	0.0419989	0.999639	0.453054	0.10741	0.499504	0.133053	-0.0440172	0.960712
1810022K09Rik	0.0287118	0.999992	0.130746	0.999639	0.676606	0.00218237	0.906527	0.0397854	-0.556665	0.312149
1810024B03Rik	-0.0919809	0.999992	-0.129339	0.999639	-0.089816	0.862577	-0.425603	0.345642	-0.127119	0.924467
1810026J23Rik	0.040159	0.999992	-0.118285	0.999639	0.7392	1.64575e-05	0.566937	0.00734516	0.224439	0.760972
1810030O07Rik	-0.0178648	0.999992	-0.0972212	0.999639	0.223956	0.208108	0.0755953	0.720034	-0.112006	0.816431
1810032O08Rik	-0.0273482	0.999992	0.0579738	0.999639	0.731254	0.0002794	0.771142	0.000341677	0.259361	0.72384
1810037I17Rik	-0.13729	0.999992	0.015975	0.999639	0.646251	0.0135841	0.633994	0.0468677	-0.227468	0.727046
1810041L15Rik	-0.00926071		0.0154756	0.999639	0.0193078		0.26784		-0.418702
1810043G02Rik	0.0101638	0.999992	0.0457587	0.999639	-0.865244	0.0106205	-0.784784	0.0410355	-0.0180419	0.987338
1810043H04Rik	-0.0483257	0.999992	-0.106414	0.999639	1.13792	0.000386287	0.905069	0.0149144	-0.167894	0.825311
1810046K07Rik	0.060344	0.999992	-0.217126	0.999639	0.219821	0.536286	-0.230647	0.599919	-0.274857	0.798543
1810055G02Rik	-0.0137977		-0.159542	0.999639	0.983043	0.0484403	0.61367	0.244976	-0.144056	0.90622
1810058I24Rik	-0.17436	0.999992	0.235843	0.999639	0.0810525	0.783452	0.35957	0.189896	-0.0869683	0.918793
1810062O18Rik	0.0403153		-0.0483996	0.999639	-0.255869	0.729421	-0.481416	0.508916	0.251039
1810064F22Rik	0.00681098	0.999992	0.163689	0.999639	-0.857223	0.101531	-0.388651	0.46703	-0.275863	0.837466
1810065E05Rik	-0.00797549				-0.280203		-0.250805		-0.159387
2010001E11Rik	0.0247107		-0.0113012	0.999639	0.424264		0.310153		-0.221998
2010002M12Rik	-0.047511		-0.0295253	0.999639	-1.07408	0.0962708	-1.31066	0.0355272	-0.0551475	0.971457
2010003K11Rik									-0.10944
2010005H15Rik	-0.0239912		0.0104488	0.999639	-0.922898		-0.718794		-0.218849
2010012O05Rik	0.0156672	0.999992	0.0668731	0.999639	-0.169557	0.5736	-0.094742	0.795805	-0.205283	0.775959
2010016I18Rik	-0.0554055	0.999992	-0.108527	0.999639	-2.04988	3.0277e-07	-2.51425	4.98988e-07	-0.0324178	0.98094
2010106E10Rik									-0.211557
2010107E04Rik	-0.0357028	0.999992	0.101963	0.999639	1.53824	2.9161e-09	1.65392	2.23001e-05	0.0780595	0.919388
2010107G12Rik	0.0111786		0.0279645	0.999639	-0.143125	0.882316	0.0473876		-0.594979
2010107G23Rik	0.0226622		0.0621649	0.999639	-0.20882		0.44421		-0.241432
2010109I03Rik	0.0219771	0.999992	-0.00811157	0.999639	-0.649052	0.155089	-0.660656	0.197743	-0.361542	0.776315
2010111I01Rik	0.0250266	0.999992	-0.0957269	0.999639	0.201414	0.356664	0.0408567	0.900094	0.748398	0.162469
2010204K13Rik	-0.0129546		-0.145815	0.999639	2.48609	1.80457e-07	2.21613	8.17342e-06	0.0365862	0.974023
2010300C02Rik	0.0297943		0.0149324	0.999639	0.393746	0.662349	0.472105		0.612915
2010320M18Rik	-0.0163432	0.999992	0.178216	0.999639	-0.638998	0.0725068	-0.301435	0.445151	-0.203801	0.828503
2200002D01Rik	-0.0230914	0.999992	0.184967	0.999639	-0.178312	0.779954	0.319282	0.572402	0.690528	0.435267
2200002J24Rik	-0.00462055		0.0259328	0.999639	-0.181581		0.12504		0.989809
2210010C04Rik	0.00466435		0.272061	0.999639	-0.855974		-0.349074	0.720597	-0.0325544
2210013O21Rik	-0.0209085		-0.0786814	0.999639	0.398713	0.52264	0.090563	0.911579	0.525069	0.675541
2210015D19Rik	-0.124618	0.999992	-0.102122	0.999639	0.306269	0.206225	0.142971	0.610953	-0.0309146	0.977337
2210016F16Rik	0.0446052	0.999992	0.168597	0.999639	0.621622	0.000903172	0.799451	0.000223533	0.229124	0.757237
2210016L21Rik	0.0309787	0.999992	-0.0302141	0.999639	0.0100905	0.967833	-0.0717271	0.825987	0.389745	0.39183
2210018M11Rik	-0.0413505	0.999992	-0.214694	0.999639	-0.0496125	0.799722	-0.338525	0.121332	0.228947	0.711571
2210407C18Rik			0.0139419	0.999639			0.250342		-0.159387
2210408I21Rik	0.0248324	0.999992	0.0779534	0.999639	0.180243	0.733548	0.346015	0.478172	-0.17557	0.873315
2210409E12Rik									-0.0950052
2210417A02Rik	-0.0289662		0.00186707	0.999639	-0.959494		-1.01322		-0.947888
2300002M23Rik									-0.0212424
2300005B03Rik	0.0189871		0.00255272	0.999639	-0.4649		-0.501978		-0.186195
2300009A05Rik	-0.0578336	0.999992	0.0445174	0.999639	0.394892	0.297145	0.440961	0.232048	0.185648	0.822792
2310001K24Rik
2310002L09Rik									-0.102625
2310003H01Rik	0.0339219	0.999992	-0.112723	0.999639	-0.0915933	0.678915	-0.297068	0.371202	0.436197	0.460833
2310007B03Rik									-0.183837
2310007L24Rik	-0.0524714	0.999992	-0.0497437	0.999639	-0.468573	0.320518	-0.660093	0.267088	-0.00394835	0.996936
2310009B15Rik	0.028733	0.999992	0.0488332	0.999639	0.436525	0.2562	0.505157	0.241427	-0.197134	0.822792
2310011J03Rik	-0.0760781	0.999992	0.0543287	0.999639	0.393769	0.0375921	0.432167	0.0470801	-0.205486	0.721522
2310014L17Rik	0.00868751	0.999992	0.12024	0.999639	0.642107	0.087775	0.838859	0.0189609	0.125316	0.907518
2310015A10Rik	-0.046218	0.999992	0.0432994	0.999639	-2.44452	1.46852e-32	-2.30501	2.28842e-13	-0.189124	0.87887
2310022A10Rik	0.101107	0.999992	0.0313159	0.999639	0.115713	0.629759	0.128495	0.609623	0.227565	0.680632
2310022B05Rik	0.0910704	0.999992	-0.0139315	0.999639	0.506957	0.0874051	0.450135	0.178708	-0.353666	0.647643
2310030G06Rik									-0.143498
2310033P09Rik	0.0975241	0.999992	0.00800536	0.999639	-0.0677448	0.810032	-0.0903009	0.79605	0.401276	0.653801
2310034C09Rik
2310035C23Rik	0.0941882	0.999992	0.0638857	0.999639	-0.555481	0.000213008	-0.504071	0.00566335	-0.00595489	0.992802
2310036O22Rik	-0.031977	0.999992	-0.0518435	0.999639	0.648926	8.2262e-06	0.546214	0.00791045	0.260339	0.494168
2310039H08Rik	-0.119062	0.999992	0.137879	0.999639	0.638996	0.0288703	0.814132	0.00372837	-0.220693	0.747954
2310045N01Rik	-0.0666653	0.999992	-0.0654828	0.999639	-0.207388	0.465453	-0.348898	0.270339	-0.233966	0.759912
2310047M10Rik	-0.0760736	0.999992	0.0896846	0.999639	-0.607868	0.00697005	-0.512263	0.023587	-0.100475	0.934033
2310050C09Rik
2310057J18Rik									0.451942	0.605552
2310057M21Rik	-0.00369109	0.999992	-0.00761007	0.999639	0.168712	0.600824	0.112805	0.815232	0.167065	0.829356
2310057N15Rik
2310061I04Rik	0.153856	0.999992	0.0560707	0.999639	0.140938	0.589848	0.179254	0.541796	0.196104	0.814428
2310061J03Rik	0.0643494	0.999992	0.303237	0.999639	0.365602	0.379967	0.96241	0.0164992	0.516303	0.503304
2310061N02Rik
2310067B10Rik	0.0287472	0.999992	-0.0968973	0.999639	-0.0634688	0.729421	-0.232586	0.373554	0.47196	0.346858
2310068J16Rik	-0.0165644		0.0072201	0.999639	0.244833	0.770441	0.268373	0.741825	0.822796	0.360062
2310079G19Rik
2410002F23Rik	0.0814412	0.999992	-0.116752	0.999639	0.462567	0.00094948	0.289221	0.0864763	0.156048	0.833164
2410004B18Rik	0.0136063	0.999992	0.10243	0.999639	0.0476062	0.850771	0.1558	0.555042	-0.00164836	0.997468
2410004P03Rik	0.0227602	0.999992	0.13461	0.999639	-0.572724	0.330927	-0.201737	0.743164	-0.968913	0.298377
2410006H16Rik	-0.0404911	0.999992	0.114176	0.999639	0.203426	0.260641	0.325718	0.220557	0.0503099	0.941264
2410012M07Rik			0.00310336	0.999639	0.214265		0.250342		-0.102625
2410015M20Rik	-0.210358	0.999992	0.183805	0.999639	0.907921	0.00136089	1.19594	0.000498537	-0.359652	0.630186
2410016O06Rik	-0.0210147	0.999992	0.00379343	0.999639	1.46955	1.46258e-20	1.43679	1.77846e-14	0.437427	0.507706
2410017I17Rik			-0.0116625	0.999639	0.236952				-0.191361
2410018L13Rik	0.118548	0.999992	0.0607418	0.999639	0.306693	0.664225	0.603836	0.369806	0.760214	0.481914
2410089E03Rik	0.0395575	0.999992	0.134469	0.999639	-0.834233	0.000246746	-0.663737	0.00357339	-0.0282279	0.977337
2410127L17Rik	0.0715402	0.999992	0.0414083	0.999639	1.2315	5.196e-10	1.22715	0.000342688	-0.10725	0.879565
2410131K14Rik	-0.0136404	0.999992	0.00162229	0.999639	-0.138643	0.618358	-0.165189	0.523363	-0.0610592	0.94669
2410137M14Rik									-0.334166
2510002D24Rik	-0.0382012	0.999992	0.0652548	0.999639	-0.761907	0.000163457	-0.705296	0.00154375	-0.239056	0.829741
2510003E04Rik	-0.0726888	0.999992	-0.237945	0.999639	0.257184	0.219351	-0.0918301	0.709518	0.273626	0.717014
2510009E07Rik	0.194755	0.999992	0.0187377	0.999639	-1.71504	0.000459847	-1.67971	0.000649306	0.247641
2510039O18Rik	-0.0764896	0.999992	-0.0152424	0.999639	0.148715	0.314971	0.0967923	0.580068	0.0929703	0.843606
2610001J05Rik	-0.106914	0.999992	0.175111	0.999639	0.0754356	0.829337	0.370455	0.340279	-0.422632	0.507706
2610002J02Rik	-0.0757327	0.999992	-0.0338313	0.999639	-0.0263182	0.929079	-0.108724	0.691116	0.0231005	0.978495
2610002M06Rik	-0.122596	0.999992	0.0994347	0.999639	0.787505	4.96941e-06	0.904383	0.00625364	-0.0727505	0.957536
2610005L07Rik	0.0229556	0.999992	-0.0259409	0.999639	-0.302498	0.0298726	-0.364948	0.0319221	-0.0140702	0.987252
2610008E11Rik	0.0287084	0.999992	0.13787	0.999639	-0.627733	0.000598643	-0.489805	0.0223427	-0.0512015	0.961928
2610015P09Rik	0.07641	0.999992	-0.0952861	0.999639	-0.247032	0.461873	-0.44459	0.190775	0.478973	0.523554
2610020H08Rik	0.108668	0.999992	-0.0778836	0.999639	0.225564	0.564803	0.0567153	0.904073	0.252152	0.78533
2610028E06Rik			-0.0288092	0.999639	0.445315				-0.229039
2610028H24Rik	0.014962		-0.0104119	0.999639	-0.110593		-0.293793
2610034B18Rik	0.0589215		-0.0850022	0.999639	0.0923374	0.924034	-0.759842		-0.221688
2610035D17Rik	-0.0980961	0.999992	-0.0223428	0.999639	-2.0905	3.4742e-10	-2.17981	1.85347e-11	-0.858252	0.390237
2610044O15Rik8	-0.0608495	0.999992	0.0778029	0.999639	0.306443	0.091943	0.376212	0.0776201	-0.171107	0.821715
2610100L16Rik			-0.0104119	0.999639	0.214265
2610203C20Rik	0.0078276		0.0139419	0.999639			0.250342		-0.29796
2610203C22Rik	0.0347421		0.00085654	0.999639	-0.197225		-0.196981		-0.221817
2610301B20Rik	0.0112829	0.999992	0.144603	0.999639	0.739434	0.0215286	0.979475	0.0129479	-0.0638774	0.954134
2610305D13Rik	-0.0322878		0.0296156	0.999639	-0.65438		-0.243451		-0.347888
2610306M01Rik	-0.0707804	0.999992	0.160103	0.999639	-0.348604	0.517912	0.0216611	0.969146	0.518076	0.546985
2610318N02Rik	0.099779	0.999992	0.0817033	0.999639	2.9924	7.24356e-20	3.06331	4.74295e-19	0.463396	0.571267
2610507B11Rik	0.0265539	0.999992	-0.0979604	0.999639	0.11403	0.280987	-0.0295452	0.865892	0.167471	0.53389
2610524H06Rik	-0.0447086	0.999992	0.0459558	0.999639	0.169985	0.595657	0.222357	0.568319	-0.223356	0.823158
2610528J11Rik			-0.0104119	0.999639	0.214265				0.100857
2700029M09Rik	0.0713455	0.999992	-0.0998955	0.999639	0.684673	0.00137727	0.524756	0.0252004	-0.211087	0.785342
2700046A07Rik
2700046G09Rik	0.0295846		0.0463073	0.999639	-0.127581		0.255386		0.337236
2700049A03Rik	0.127436	0.999992	-0.0728052	0.999639	0.134661	0.52062	0.00981274	0.971718	0.280064	0.64035
2700060E02Rik	0.0294568	0.999992	0.0659663	0.999639	0.977578	1.47982e-08	1.02602	0.000301617	-0.183507	0.800978
2700062C07Rik	-0.0655331	0.999992	-0.0933594	0.999639	0.36448	0.245487	0.184568	0.558229	-0.149208	0.842149
2700081O15Rik	0.0517216	0.999992	-0.025078	0.999639	1.00413	9.25156e-11	0.940339	1.35448e-06	0.8056	0.292041
2700089E24Rik	0.036019	0.999992	0.164152	0.999639	0.785976	0.0036921	1.00951	0.00586261	0.0843129	0.944413
2700094K13Rik	-0.151394	0.999992	-0.00437701	0.999639	1.36125	7.04844e-11	1.28525	0.000158463	-0.291613	0.524399
2700097O09Rik	0.050621	0.999992	-0.121225	0.999639	-0.34204	0.326147	-0.580207	0.10939	-0.135186	0.900764
2700099C18Rik	0.0749254	0.999992	0.177732	0.999639	0.914236	0.0252951	1.25339	0.000300629	-0.0929242	0.938107
2810001G20Rik	-0.0213268	0.999992	-0.0217987	0.999639	-0.120691	0.786428	-0.177618	0.750067	-0.11356	0.922086
2810002D19Rik	0.053443	0.999992	0.0640565	0.999639	-0.235709	0.562734	-0.103351	0.848899	0.137767	0.933631
2810004N23Rik	0.00841872	0.999992	-0.0511083	0.999639	0.829554	4.72173e-06	0.737983	0.000155024	-0.030034	0.961752
2810006K23Rik	0.0106009	0.999992	-0.0277556	0.999639	0.0944418	0.750509	0.0188525	0.956527	-0.229439	0.692788
2810007J24Rik			0.0130379	0.999639			0.231711		-0.263797
2810008D09Rik	0.017772	0.999992	0.0591472	0.999639	0.39114	0.374092	0.514333	0.141113	-0.0250022	0.98094
2810021J22Rik	0.0385985	0.999992	0.0105352	0.999639	-0.778961	0.0029722	-0.782961	0.00906032	-0.0811871	0.939111
2810025M15Rik	-0.0945001	0.999992	-0.0756612	0.999639	1.52376	1.49134e-05	1.388	0.000103761	-0.679821	0.546293
2810032G03Rik									-0.17956
2810047C21Rik1	-0.00822279		0.0130379	0.999639	-0.28926		-0.0482884		-0.15023
2810403A07Rik	0.031067	0.999992	-0.0501516	0.999639	-0.156149	0.313841	-0.249249	0.0746051	0.0166479	0.978461
2810403D21Rik	0.000250829	0.999992	0.159573	0.999639	-0.631814	0.0603541	-0.349692	0.336521	-0.377058	0.656573
2810405F15Rik	0.00830743								-0.163885
2810408A11Rik	-0.0476935	0.999992	-0.105813	0.999639	0.572771	0.218034	0.300958	0.552691	0.269143	0.826672
2810408M09Rik	-0.143668	0.999992	-0.115576	0.999639	0.278831	0.312133	0.0988056	0.778376	0.164055	0.825491
2810410L24Rik			-0.0683599	0.999639	0.93235				0.292192
2810417H13Rik	0.0275367	0.999992	0.0694081	0.999639	2.95219	1.34591e-44	2.88157	1.78176e-12	-0.0795313	0.92491
2810428I15Rik	-0.108539	0.999992	-0.262388	0.999639	0.955462	0.000354421	0.526599	0.0732297	0.0857554	0.925398
2810429I04Rik	0.0783727	0.999992	-0.0497889	0.999639	-0.106821	0.680919	-0.206901	0.419663	-0.521611	0.523554
2810433D01Rik	0.00830743								-0.104745
2810454H06Rik	-0.0662578	0.999992	0.0898809	0.999639	-0.318543	0.54998	-0.0408983	0.94664	0.207588	0.851156
2810459M11Rik	-0.00797549		0.0392707	0.999639	-0.0394241		0.501377		-0.2311
2810474O19Rik	0.00721285	0.999992	0.0489934	0.999639	-0.113849	0.448424	-0.0852187	0.667508	-0.164132	0.800053
2900005J15Rik	0.0686563		0.112428	0.999639	0.57505	0.371601	0.982594	0.072866	0.144331	0.920801
2900011O08Rik	0.0078276								0.107082
2900026A02Rik	-0.103504	0.999992	0.0235219	0.999639	3.18942	2.01002e-52	3.18078	1.65542e-45	0.675315	0.552574
2900041M22Rik	0.00154526		0.00771148	0.999639	0.67417	0.439127	0.555003		-1.24083
2900052N01Rik	-0.0441096	0.999992	0.103091	0.999639	-2.70506	4.7957e-05	-1.95701	0.0033862	-0.622967
2900060B14Rik	-0.200529	0.999992	-0.0556716	0.999639	-0.422517	0.28551	-0.573765	0.128202	-0.245988	0.822792
2900079G21Rik	0.0213668		0.0703691	0.999639			1.01386		-0.0446694
2900092C05Rik
2900092D14Rik	-0.023909		0.127073	0.999639	-0.377601		0.519396	0.555304	-1.1388
2900097C17Rik	-0.0521012	0.999992	0.0422072	0.999639	0.477433	0.000737718	0.496659	0.0647855	-0.186309	0.779745
3000002C10Rik	0.0138485	0.999992	0.160849	0.999639	-0.0786872	0.869483	0.209567	0.633688	0.0515471	0.966019
3010026O09Rik	0.115323	0.999992	0.0283264	0.999639	0.825147	0.0467625	0.856878	0.0506733	-0.357195	0.585659
3110001I22Rik	0.151504	0.999992	-0.0335228	0.999639	0.104467	0.69088	0.0242226	0.935322	0.0654496	0.941791
3110002H16Rik	-0.0108847	0.999992	0.0503419	0.999639	-0.536352	0.00242776	-0.508959	0.018077	-0.0297716	0.974023
3110007F17Rik	-0.00505893		-0.0703071	0.999639	1.14342	0.127349	0.743323	0.382574	0.108071
3110009E18Rik	-0.000784079	0.999992	0.0816441	0.999639	0.091334	0.888157	0.290446	0.618755	-0.269948	0.822792
3110021A11Rik	0.00781349		0.0142165	0.999639	-0.0357932		0.163241		-0.113634
3110035E14Rik	-0.00531304		-0.0107874	0.999639	-0.24508		-0.440514		-0.121095
3110039M20Rik									-0.102625
3110040N11Rik	0.0676843	0.999992	0.0301757	0.999639	0.100908	0.806308	0.125638	0.774413	-0.288002	0.711788
3110043O21Rik	0.00439943	0.999992	-0.0467589	0.999639	-0.830266	0.000203438	-0.92892	0.00309102	-0.13348	0.910982
3110052M02Rik	0.100986	0.999992	0.143468	0.999639	-0.647488	0.0039179	-0.429582	0.152793	-0.636957	0.315036
3110057O12Rik	0.00515712	0.999992	0.0965608	0.999639	-0.759278	0.0207072	-0.569929	0.156356	-1.00615	0.0425147
3110062M04Rik	0.0499783	0.999992	0.123219	0.999639	-0.819922	0.00430989	-0.645819	0.0218447	-0.0383461	0.970264
3110070M22Rik	0.000105598		-0.0969567	0.999639	0.15874	0.833279	-0.244261	0.767622	-0.442605
3110079O15Rik
3110082I17Rik	-0.0296977	0.999992	0.122189	0.999639	1.9856	3.41366e-09	2.15845	6.25022e-10	0.179045	0.86242
3110099E03Rik			0.0139419	0.999639			0.250342		-0.202828
3300002I08Rik	0.00560416	0.999992	-0.0809898	0.999639	-0.209679	0.576482	-0.377601	0.366491	-0.115121	0.901183
3425401B19Rik	0.00817865	0.999992	0.115815	0.999639	0.425769	0.42427	0.720177	0.247218	0.0819432	0.953594
3632451O06Rik	0.00741789		-0.0104119	0.999639	0.214265				-0.200245
3830403N18Rik	-0.00416441		0.0254571	0.999639	0.915005	0.278551	0.953242	0.278787	-0.273247
3830406C13Rik	0.0381586	0.999992	0.149428	0.999639	0.00638419	0.985647	0.269497	0.540024	-0.697784	0.414951
3830408C21Rik	0.0325663		-0.138641	0.999639	0.0189787	0.981021	-0.676085	0.335789	-0.155561
3830417A13Rik									-0.159387
3930402G23Rik	0.0459336		0.00594598	0.999639	-0.451879		-0.462593		-0.227992
4430402I18Rik	0.0199521		0.0412577	0.999639	-0.512221		0.0765068		-0.0142352
4632415L05Rik	-0.0192296	0.999992	0.150633	0.999639	-0.318117	0.103772	-0.161519	0.460521	-0.224546	0.716525
4632427E13Rik	0.0767297	0.999992	-0.0026986	0.999639	-0.413173	0.0364706	-0.44825	0.0429479	-0.266843	0.766131
4632428C04Rik	-0.0236707	0.999992	0.066513	0.999639	-1.00146	0.000267117	-0.889136	0.014338	-0.294724	0.820347
4632428N05Rik	-0.0818322	0.999992	-0.0939766	0.999639	-1.08376	4.99281e-06	-1.27134	9.92282e-07	-0.448801	0.711788
4732416N19Rik	0.0193241		-0.0153906	0.999639	0.25898	0.760719	0.143043	0.877945	-0.0247743
4732456N10Rik									0.362047
4732471J01Rik	0.0162592	0.999992	0.0841102	0.999639	-0.5132	0.325629	-0.259517	0.666659	0.425283	0.711788
4831440E17Rik	-0.0283587	0.999992	-0.0942968	0.999639	-0.443811	0.37628	-0.720757	0.152894	-0.281374	0.821715
4833418N02Rik	-0.0391335	0.999992	0.0670454	0.999639	-0.947625	0.104009	-0.767306	0.144788	-0.813239	0.33141
4833420G17Rik	0.123754	0.999992	0.0166613	0.999639	-0.432968	0.00387125	-0.443636	0.00256726	0.179508	0.829181
4833422C13Rik	0.0274595	0.999992	0.0414619	0.999639	-0.880778	0.168705	-0.750183	0.233718	-0.55849
4833423E24Rik									-0.137827
4833427G06Rik			0.00085654	0.999639	0.228199		0.24385		0.0323532
4833439L19Rik	0.00116976	0.999992	-0.128729	0.999639	0.403182	0.0154917	0.219416	0.264993	0.152171	0.746848
4921501E09Rik	-0.00926071				-0.318149		-0.293793		-0.0420852
4921504E06Rik	0.00665474		0.01123	0.999639	-0.4605		-0.36904		-0.400938
4921506M07Rik									-0.0514938
4921507P07Rik	-0.0122648	0.999992	0.116095	0.999639	-0.719979	0.220505	-0.353801	0.551586	0.00800479	0.994474
4921509C19Rik	0.00741789		0.0130379	0.999639			0.231711		-0.0735801
4921511C20Rik			0.00171422	0.999639	0.228199		0.250342		-0.159387
4921511H03Rik			0.0183085	0.999639			0.308003		-0.186195
4921511M17Rik
4921517D22Rik	0.00741789		0.0179473	0.999639			0.331664		-0.324032
4921524J17Rik	-0.0494972	0.999992	-0.0289589	0.999639	0.341381	0.269635	0.264947	0.41898	0.123041	0.905918
4921524L21Rik									-0.188595
4921530L21Rik									-0.10944
4921531C22Rik	0.127551	0.999992	0.0384094	0.999639	-0.157052	0.726752	-0.109603	0.808863	-0.12253	0.922885
4921533I20Rik	-0.00926071				-0.318149		-0.293793
4921536K21Rik	0.00829278		0.040501	0.999639	-0.917537		-0.510798		-0.388629
4921539E11Rik	-0.0115165				-0.406478		-0.461162		-0.307872
4922502D21Rik	0.0163224				-0.318149		-0.293793
4930402F06Rik	-0.000878864		-0.021256	0.999639	-0.114572		-0.37005		-0.268264
4930402H24Rik	0.0950649	0.999992	0.108456	0.999639	-1.59308	4.87455e-12	-1.42138	3.57305e-07	-0.0711521	0.960712
4930404I05Rik	0.110925	0.999992	0.00264612	0.999639	-0.0859624	0.881836	-0.114684	0.838772	-0.0798721	0.958843
4930404N11Rik	0.0690166	0.999992	-0.139373	0.999639	1.0708	5.05598e-05	0.836188	0.00646797	-0.212583	0.721522
4930407I10Rik	0.00872066		0.0262971	0.999639	-0.280203		0.198825		-0.33284
4930412C18Rik	-0.00797549		0.0543142	0.999639	-0.280203		0.610364		-0.4131
4930412O13Rik	-0.000148019		0.0139419	0.999639	-0.280203		0.00217195		-0.0681806
4930415F15Rik	0.039429		0.0170325	0.999639	-0.154406		0.0480036		-0.667251
4930415L06Rik	0.00830743		-0.0104119	0.999639	0.214265				-0.454462
4930415O20Rik	0.000860462				-0.280203		-0.250805		-0.0310776
4930417O13Rik	0.0543488	0.999992	0.0268427	0.999639	-1.21273	0.04675	-1.05347	0.0911719	0.106235	0.946788
4930426L09Rik	0.0123139	0.999992	0.0735267	0.999639	-1.29411	0.0481401	-0.752897	0.309249	-0.572335
4930427A07Rik	-0.0148432	0.999992	-0.29162	0.999639	1.01849	5.07548e-11	0.611448	0.00691189	0.849599	0.0991897
4930428D18Rik
4930429B21Rik	-0.00897948		-0.00527661	0.999639	-0.091414		-0.170207		-0.207277
4930429F11Rik									-0.156755
4930430A15Rik			0.0139419	0.999639			0.250342		-0.229695
4930430F08Rik	0.03452	0.999992	0.0133936	0.999639	0.470846	0.311904	0.47034	0.278355	0.0678672	0.950539
4930432K21Rik	0.0188825	0.999992	0.0832795	0.999639	-0.394636	0.566317	-0.138463	0.845289	0.0634323	0.963611
4930433I11Rik	0.00741789								-0.196471
4930433N12Rik	-0.0776259		-0.0936593	0.999639	-0.614424	0.416128	-1.20934	0.115266	-0.500432
4930435E12Rik	-0.00797549		0.0139419	0.999639	-0.280203		0.00217195		-0.188595
4930442L01Rik									-0.289467
4930444G20Rik	0.0639181	0.999992	-0.0628819	0.999639	-1.14901	0.01565	-1.43512	0.00131692	-0.335844	0.810408
4930447C04Rik	-0.019783		-0.0149073	0.999639	0.169245	0.830674	0.0922333	0.913909	-0.148465
4930448K20Rik	-0.00797549		-0.021116	0.999639	0.122853		-0.250805		-0.364907
4930449I24Rik									-0.102625
4930451I11Rik									-0.14645
4930452B06Rik	0.0078276		0.046548	0.999639			0.727414		-0.410457
4930453N24Rik	0.0124616	0.999992	0.0758629	0.999639	0.368088	0.0389728	0.447698	0.161839	-0.166415	0.775387
4930465K10Rik	0.0122276		0.0332105	0.999639	0.631827		1.01383		-0.0979649
4930467E23Rik	-0.00782424		0.0339477	0.999639	-0.475666		0.0634718		-0.0899926
4930468A15Rik			0.0135707	0.999639			0.24385		-0.201082
4930470P17Rik									-0.159387
4930471G03Rik	-0.00822279		0.0708857	0.999639	-0.0323932		0.889518		-0.808193
4930474M22Rik	-0.00797549				-0.280203		-0.250805
4930474N05Rik	0.00826378		0.026729	0.999639	0.312952		0.648183		-0.865339
4930480E11Rik									-0.163885
4930481A15Rik	0.100107	0.999992	-0.0132086	0.999639	-2.18513	1.81034e-13	-2.25578	2.55246e-14	0.017283	0.98997
4930483J18Rik	-0.00926071		-0.0210601	0.999639	0.234703		-0.0691041		-0.14645
4930486L24Rik	-0.000515292		0.0010091	0.999639	-0.0357932		-0.0268615		0.0911915
4930488L21Rik			0.0240211	0.999639			0.404275		-0.264002
4930502E18Rik									-0.102625
4930503B20Rik	-0.000148019		-0.0112071	0.999639	-0.0182905		-0.250805		0.123154
4930503E14Rik	-0.00797549				-0.280203		-0.250805		-0.211143
4930503E24Rik	0.00688707		0.0772503	0.999639	2.08937	0.000127502	2.31324	8.25323e-06	0.118323	0.92264
4930503H13Rik									-0.102625
4930503L19Rik	0.0983036	0.999992	-0.16693	0.999639	0.0670787	0.781109	-0.199896	0.491475	-0.0601678	0.947793
4930504O13Rik									-0.0212424
4930505A04Rik									-0.102625
4930506M07Rik	0.0648511	0.999992	0.0591916	0.999639	-0.883789	0.187073	-0.584225	0.346606	-1.0835	0.22691
4930507D05Rik	0.0215415		0.0659285	0.999639	0.33872	0.59415	0.540876	0.359276	-0.340704	0.760377
4930511M06Rik	0.110176	0.999992	0.00692785	0.999639	-0.46153	0.0519245	-0.481946	0.0590957	-0.222222	0.803393
4930512B01Rik	0.0153124	0.999992	0.0711936	0.999639	-1.59382	0.00109844	-1.28424	0.0177526	-0.406581	0.759912
4930513N10Rik	0.0369269	0.999992	-0.191784	0.999639	0.872515	0.0117866	0.504738	0.183027	0.453354	0.576204
4930515G01Rik	0.0711634	0.999992	-0.12587	0.999639	0.491131	0.245366	0.175179	0.739363	1.12688	0.0748311
4930515G16Rik	-0.00793835		0.0135707	0.999639	-1.19266		-1.01113
4930519F09Rik	-0.0388177	0.999992	0.150793	0.999639	-0.537878	0.0327733	-0.346259	0.1844	-0.377614	0.607907
4930519F16Rik	0.0179768								-0.268264
4930519G04Rik	0.00807588		-0.0261618	0.999639	-0.727752	0.360722	-1.01097	0.205191	0.363177
4930522H14Rik	0.00766811		0.0139419	0.999639			0.250342		-0.213135
4930523C07Rik	0.00266124	0.999992	-0.00627254	0.999639	-0.786268	3.16706e-13	-0.824377	2.23502e-10	0.118607	0.919116
4930524B15Rik									-0.10944
4930526I15Rik	0.0061832	0.999992	0.131535	0.999639	-0.179169	0.766048	0.12355	0.831795	0.42138	0.745807
4930528A17Rik	0.0639023	0.999992	0.0679509	0.999639	-0.291182	0.626671	-0.140173	0.815788	0.270667	0.822792
4930529C04Rik			0.0148618	0.999639	0.328114		0.537504		-0.370883
4930538K18Rik	-0.0113972		0.0645907	0.999639	-0.267608	0.775204	0.223655		-0.436138
4930539E08Rik	0.0214494	0.999992	0.164528	0.999639	-0.38185	0.347178	-0.0834665	0.876228	-0.0750733	0.946788
4930539J05Rik	-0.0151762		0.0935859	0.999639	-0.622314	0.358316	-0.277174	0.684572	-0.53666
4930544D05Rik	0.00888512		-0.0209456	0.999639	0.119479		-0.250805		-0.01428
4930544G11Rik			0.0139419	0.999639			0.250342		-0.00875167
4930548H24Rik	0.0450816		0.0178721	0.999639	-1.24925	0.12493	-1.02294	0.226377	-0.313882
4930549C01Rik									-0.102625
4930550C14Rik	0.0195575		0.00995415	0.999639	-0.783924		-0.56191		-0.160162
4930550L24Rik			0.0102203	0.999639	0.214265		0.331664		-0.0807744
4930555G01Rik	0.00482041		0.0209279	0.999639	0.0311434		0.257095		-0.851583
4930557A04Rik
4930558C23Rik									-0.0564303
4930562C15Rik	0.0993209	0.999992	0.158774	0.999639	-0.627812	0.07776	-0.341105	0.347954	0.0518332	0.966055
4930563D23Rik	-0.00699339		0.0430509	0.999639	-0.427587		0.0220952		-0.150701
4930563E22Rik	-0.00992276		-0.000355134	0.999639	-0.212742	0.749339	-0.232394	0.778343	-0.0983754
4930567H12Rik			0.0131661	0.999639	0.236952		0.420373		0.0171738
4930567H17Rik	0.00830743								-0.102625
4930568D16Rik
4930571K23Rik									0.123154
4930578C19Rik	0.0240361				-0.461579		-0.422754		-0.186195
4930578I06Rik			0.0179473	0.999639			0.331664
4930579F01Rik	0.00741789								-0.213135
4930579G24Rik	-0.000738326	0.999992	-0.198888	0.999639	2.06961	5.90497e-17	1.7156	4.49819e-07	0.0884772	0.928439
4930579K19Rik	0.00572255		-0.0659982	0.999639	0.550884	0.512807	0.0549062		-0.156802
4930581F22Rik	0.000502863	0.999992	0.0942637	0.999639	-0.947095	0.00288113	-0.809242	0.00606047	0.149452	0.897722
4930583K01Rik	0.0158083		0.0179473	0.999639	-1.17745		-0.773848		-0.383929
4930584F24Rik									-0.186195
4930590J08Rik	0.0200554		-0.0888177	0.999639	0.0280555	0.976732	-0.724342		0.0984174
4930592I03Rik	0.0194981	0.999992	0.103524	0.999639	-0.882179	0.0361474	-0.612613	0.251428	0.441237	0.705195
4930594C11Rik	-0.0240713	0.999992	0.0257184	0.999639	-1.51803	7.45903e-08	-1.45608	4.09218e-06	0.129395	0.92491
4930595M18Rik			0.0130379	0.999639			0.231711		-0.211557
4930596D02Rik
4931406B18Rik	0.144772		0.230979	0.999639	-0.51753	0.541662	0.533346	0.494274	-0.583472	0.629759
4931406C07Rik	0.00729159	0.999992	-0.127066	0.999639	-0.187864	0.615117	-0.453925	0.227744	0.130881	0.887153
4931406H21Rik	-0.110084	0.999992	-0.100942	0.999639	-0.747271	0.00463732	-0.963796	0.0107789	0.353014	0.711788
4931406P16Rik	-0.0714	0.999992	-0.0971088	0.999639	-0.0500517	0.765194	-0.197322	0.289283	0.169397	0.741312
4931408C20Rik			0.0358813	0.999639			0.579729		-0.351366
4931409K22Rik	0.00741789		0.0183085	0.999639			0.308003		-0.270072
4931414P19Rik	-0.0632283	0.999992	0.0119196	0.999639	0.317478	0.328375	0.304872	0.34144	0.176043	0.848302
4931417E11Rik									-0.159387
4931423N10Rik	-0.0139406		-0.00796268	0.999639	-0.00310067		-0.10297		-0.352078
4931428F04Rik	0.0224811	0.999992	0.113782	0.999639	-0.287293	0.517912	-0.0523837	0.920352	0.0794497	0.952627
4931428L18Rik	-0.0256414		-0.00904072	0.999639	-1.12745	0.0822201	-1.20572	0.0743807	-0.776174
4931429I11Rik	0.00450914	0.999992	0.00309528		-0.0656305		-0.0177623		0.081322	0.929297
4931429L15Rik	-0.00686582		-0.0210477	0.999639	-0.91857	0.216804	-1.11879	0.134839	-0.198454
4931431F19Rik			-0.0156179	0.999639	0.289223
4931440F15Rik	-0.018118		-0.0090245	0.999639	-0.633309		-0.791727		-0.774442
4931440P22Rik	-0.0309136	0.999992	-0.0732828	0.999639	-0.218885	0.543432	-0.389654	0.242645	0.164573	0.864285
4932411E22Rik									0.100857
4932411N23Rik	-0.00553828		0.0751864	0.999639	-0.992978	0.23706	-0.389927	0.666845	-0.866655	0.371959
4932414J04Rik									-0.382069
4932414N04Rik	-0.024451		-0.0546894	0.999639	-0.352969	0.690001	-0.895236		0.136801
4932415M13Rik									-0.188595
4932416H05Rik	-0.0364847	0.999992	0.045686	0.999639	0.424444	0.416066	0.514492	0.300682	0.0223306	0.984578
4932418E24Rik			0.0139419	0.999639			0.250342		0.178068
4932429P05Rik	0.0078276								-0.225433
4932435O22Rik			3.69703e-05	0.999639	0.236952		0.24385		-0.037359
4932438A13Rik	-0.0124355	0.999992	-0.0397699	0.999639	-0.856376	1.9693e-12	-0.933955	1.0599e-09	-0.105366	0.897811
4932438H23Rik	0.0286553		0.0235063	0.999639	-0.0216885		0.310153		-0.224618
4932441J04Rik									-0.229695
4932443I19Rik	0.0930176	0.999992	0.174579	0.999639	-0.658025	0.224679	-0.202199	0.699523	-0.266354	0.82212
4933400A11Rik									-0.159387
4933400F21Rik	-0.00322024		-0.160374	0.999639	-0.513594	0.518565	-2.10516		-0.084781
4933401B06Rik
4933402E13Rik			-0.0116625	0.999639	0.236952				-0.186195
4933402J07Rik
4933402N03Rik			-0.0104119	0.999639	0.214265				-0.201082
4933402N22Rik									-0.15023
4933402P03Rik	-0.0184115				-0.677498		-0.600824		-0.202828
4933403O08Rik									-0.102625
4933404O12Rik	0.1272	0.999992	-0.17775	0.999639	1.1859	6.27968e-06	0.91473	0.00171662	0.310801	0.7379
4933405L10Rik			-0.0561433	0.999639	0.913903		0.231711		-0.14298
4933405O20Rik			0.0135707	0.999639			0.24385		-0.261627
4933406F09Rik									-0.10944
4933406I18Rik	-0.0473791	0.999992	0.0186101	0.999639	-1.92994	0.000178797	-1.8881	0.000179257	-0.11491
4933406J08Rik									-0.102625
4933406K04Rik	0.00451886		-0.0116625	0.999639	-0.0729188		-0.293793		-0.159387
4933406M09Rik	-0.00151001		-0.0324415	0.999639	-0.263039		-1.02542		-0.455996
4933407K13Rik	0.0584479	0.999992	-0.00995944	0.999639	-0.182663	0.601022	-0.232841	0.567572	-0.205959	0.882065
4933407L21Rik	0.0617287	0.999992	-0.158567	0.999639	-0.363063	0.576596	-1.0442	0.10506	-0.529548
4933408B17Rik	0.179064	0.999992	-0.0404229	0.999639	-0.0658065	0.905593	-0.201434	0.691547	-0.167821	0.910964
4933409G03Rik	0.00766811		0.0135707	0.999639			0.24385		-0.603388
4933409K07Rik	-0.00851142		0.0135707	0.999639	-0.475666		-0.295016
4933411G11Rik			-0.031031	0.999639	0.61148		0.231711		-0.17049
4933411K16Rik	0.0124613		-0.0111212	0.999639	0.226023				0.213059
4933412E24Rik	-0.00431701		-0.0104857	0.999639	-0.0453611		-0.227008		-0.0970104
4933413G19Rik	-0.0139593		-0.0361172	0.999639	1.0694	0.194471	0.714701		0.307944
4933415F23Rik	-0.00797549		0.00310336	0.999639	-0.0394241		0.00217195		-0.0127132
4933416C03Rik	-0.00162207		0.0130379	0.999639	-0.318149		-0.10698		-0.181909
4933417A18Rik									-0.202828
4933417G07Rik	-0.000515292		0.0139419	0.999639	-0.28926		-0.0118225		-0.190909
4933421I07Rik	0.0117285		-0.0104119	0.999639	0.214265				-0.168258
4933425L06Rik									-0.0274768
4933427D06Rik	-0.0117523		-0.0197164	0.999639	-0.202489		-0.530418		-0.0824745
4933427D14Rik	0.0387914	0.999992	-0.100523	0.999639	0.266798	0.221782	0.0874569	0.777808	0.384466	0.553288
4933427E11Rik	-0.0138065		-0.00740552	0.999639	0.150441	0.865002	0.0881507	0.924056	-0.344606
4933427G17Rik	0.0278399		-0.00221028	0.999639	0.518577		0.591064		-0.102625
4933429O19Rik									-0.186195
4933430I17Rik	0.0385151		0.0396465	0.999639	0.13003	0.890166	0.400939	0.656169	-0.147326
4933431E20Rik	-0.0331341	0.999992	-0.204569	0.999639	-0.358469	0.34827	-0.80424	0.0258824	-0.562258	0.500692
4933432I09Rik	0.0163901		0.00595149	0.999639	-0.744028	0.389095	-0.752661		-0.114533
4933433C11Rik	0.00571283		0.00225269	0.999639	-0.238321		-0.205014		-0.0658626
4933434E20Rik	-0.0188065	0.999992	0.00638312	0.999639	-0.0167281	0.924765	-0.0353604	0.870616	-0.266107	0.582797
4933436I01Rik									-0.0212424
4933439C10Rik	0.0336018	0.999992	0.0898225	0.999639	-0.0363707	0.933348	0.104141	0.836275	0.434618	0.641801
5031410I06Rik	0.0105482		-0.00693891	0.999639	0.188764		0.120979		-0.820937
5031414D18Rik	0.180087	0.999992	0.151311	0.999639	-1.62601	5.39276e-29	-1.39999	1.34291e-07	-1.00501	0.105439
5031425F14Rik	0.0191444		-0.0403869	0.999639	0.0163096	0.987142	-0.429219		-0.121513
5031426D15Rik	0.0487033	0.999992	0.022981	0.999639	-0.280382	0.645802	-0.235946	0.705287	0.797486
5031434O11Rik	-0.00536311	0.999992	-0.133594	0.999639	-0.839496	0.181643	-1.61031	0.0173144	-0.16802
5031439G07Rik	0.0568418	0.999992	-0.0261843	0.999639	0.440953	2.55721e-06	0.37966	0.0103024	-0.0604479	0.942151
5033404E19Rik									-0.102625
5033406O09Rik	-0.0584101		0.00607636	0.999639	-0.478143	0.560653	-0.491384	0.548407	0.286369
5330413P13Rik	0.00741789		0.0118189	0.999639	0.228199		0.308003		-0.201082
5330417C22Rik	0.00471253		0.00534363	0.999639	-0.179396		-0.134641		-0.00416102
5330426P16Rik	0.0567234	0.999992	-0.0872138	0.999639	-2.17343	8.65178e-13	-2.40747	1.89406e-14	-0.919282	0.282685
5330434G04Rik	0.0107188		0.0139419	0.999639	-0.318149		-0.0691041		-0.149063
5330439B14Rik
5430402E10Rik			0.0250508	0.999639			0.420373
5430402O13Rik	-0.0363458		-0.0684165	0.999639	0.0505299	0.949563	-0.328554	0.688115	-0.371513
5430405H02Rik	0.238544	0.999992	-0.0043084	0.999639	-0.46432	0.137075	-0.500292	0.0944187	-0.0301483	0.976389
5430416O09Rik	-0.00980161		-0.0204062	0.999639	-0.538554	0.545324	-0.820968		-0.37353
5430419D17Rik			0.0139419	0.999639			0.250342		-0.128372
5430421N21Rik	0.00175677		0.0368917	0.999639	-0.28926		0.348373		0.0357492
5430427O19Rik	0.0341344	0.999992	0.142797	0.999639	-1.22012	3.44741e-13	-1.03659	1.1694e-05	-1.05826	0.0562415
5430435G22Rik	0.00780669	0.999992	0.0518957	0.999639	-0.744223	0.251294	-0.480677	0.489367	-0.123372	0.939111
5530400C23Rik									-0.159387
5530601H04Rik	0.0518299	0.999992	0.195467	0.999639	-0.354837	0.0719103	-0.140672	0.538799	-0.510276	0.332808
5730408K05Rik	-0.0579239		0.149326	0.999639	1.15734	0.0141995	1.4667	0.0013954	0.182319	0.837314
5730409E04Rik	0.0035439		-0.0898809	0.999639	0.175533	0.792147	-0.156907	0.816382	-1.19647	0.128972
5730416F02Rik	-0.0034378		0.0107078	0.999639	0.102749		0.209439		0.0558408
5730422E09Rik	0.0806729	0.999992	0.0283407	0.999639	-0.770326	0.158857	-0.62889	0.367941	0.0225405	0.987055
5730455P16Rik	0.0264296	0.999992	0.0455242	0.999639	-0.131988	0.602786	-0.103245	0.721545	0.0114548	0.984969
5730507C01Rik	0.155283	0.999992	0.0621022	0.999639	0.599672	0.140052	0.701547	0.122775	0.608968	0.523857
5730508B09Rik	0.0483688	0.999992	-0.0365016	0.999639	0.908752	0.00760477	0.815998	0.040063	0.0674761	0.960342
5730522E02Rik	0.00766811		-0.0363254	0.999639	0.902624		0.30082		-0.0659946
5730559C18Rik	0.00513979		0.00895463	0.999639	0.359005		0.567349		-0.11779
5830411N06Rik	0.0273541		-0.00113162	0.999639	-0.615012		-0.778221		0.096922
5830415F09Rik	-0.0343065	0.999992	-0.0978152	0.999639	-0.240133	0.308212	-0.396654	0.137674	0.0264374	0.97732
5830416P10Rik	0.0399001	0.999992	0.0893186	0.999639	-1.08489	8.07633e-15	-0.918159	0.00644108	0.306541	0.747559
5830417I10Rik	0.0530862	0.999992	-0.065503	0.999639	-0.188234	0.223751	-0.303994	0.132315	0.167878	0.833472
5830432E09Rik	0.0297424	0.999992	0.0523244	0.999639	-1.82096	1.61914e-06	-1.69338	9.9549e-06	-0.211828	0.885896
5930412G12Rik									-0.497309
6030408B16Rik	-0.011219		0.10925	0.999639	2.032	0.00020812	2.22464	0.000172893	0.951593
6030419C18Rik	0.0114645				-0.485581		-0.44427		-0.0206762
6030458C11Rik	0.0661184	0.999992	-0.0797417	0.999639	0.168737	0.34433	0.03821	0.864064	0.23459	0.719166
6030468B19Rik	-0.0106285	0.999992	0.0574747	0.999639	-2.89569	1.70905e-05	-2.26994	0.000545033	-0.0619936
6030498E09Rik
6230400D17Rik	0.0540269	0.999992	0.0203937	0.999639	-0.691218	0.0319251	-0.679704	0.0145534	-0.164852	0.882331
6330403A02Rik	0.125169	0.999992	0.0207682	0.999639	-1.74349	0.0101684	-1.65189	0.0121411	-1.08249
6330403K07Rik	0.0425402		0.0247908	0.999639	0.476312	0.595873	0.689811		-0.0976065
6330407A03Rik	0.0450526	0.999992	0.00204516	0.999639	-1.5315	1.35273e-12	-1.53462	3.94587e-08	-0.420568	0.717911
6330408A02Rik	0.0289321	0.999992	0.0589465	0.999639	-0.312053	0.225024	-0.254202	0.385967	0.0157118	0.987338
6330416G13Rik	0.0776633	0.999992	-0.0663381	0.999639	-0.0876679	0.685555	-0.206091	0.355089	-0.15147	0.859504
6330419J24Rik	0.0163813		0.010158	0.999639	0.249965		0.42678		-1.03363	0.242411
6330549D23Rik	-0.0185861	0.999992	-0.328879	0.999639	1.11473	0.00898666	0.457345	0.384173	0.148988	0.887153
6430411K18Rik
6430531B16Rik	-0.0139593		-0.0121065	0.999639	-0.270543		-0.485281		-0.387758
6430548M08Rik	0.0797773	0.999992	-0.0407647	0.999639	-0.748916	0.138428	-0.9187	0.0764466	0.00473286	0.996936
6430550D23Rik	0.0484973	0.999992	-0.0766506	0.999639	-0.774276	0.201338	-1.10287	0.137208	-0.744235
6430562O15Rik	-0.0666237		-0.0115327	0.999639	0.0607044	0.938009	-0.014761	0.985828	-0.0987722	0.950539
6430571L13Rik	-0.046933		0.0602911	0.999639	-1.42056	0.0426269	-1.08688	0.111477	-0.263169
6430573F11Rik			-0.0112071	0.999639	0.228199				0.126531
6530402F18Rik	-0.0155048	0.999992	0.041644	0.999639	-1.15301	1.27635e-05	-1.07705	0.0010986	0.57463	0.62863
6530411M01Rik	-0.00926071		0.0179473	0.999639	-0.318149		0.0531246		-0.216649
6720489N17Rik	-0.0609101	0.999992	0.0882876	0.999639	0.424289	0.267433	0.690939	0.30628	-0.259951	0.84384
6820408C15Rik	0.00148528		0.0599156	0.999639	-0.198186		0.338741		0.0443762
6820431F20Rik	-0.0126583	0.999992	0.104324	0.999639	-0.0746138	0.61207	0.0265177	0.916687	-0.212685	0.748954
7420426K07Rik
7420461P10Rik									-0.201082
8030411F24Rik									-0.159387
8030462N17Rik	0.0928051	0.999992	-0.13561	0.999639	0.032293	0.863878	-0.164491	0.357856	0.109974	0.868136
8430408G22Rik	0.336791	0.999047	-0.0533634	0.999639	0.623337	0.25248	0.440531	0.338931	-0.916128	0.34343
8430419L09Rik	0.0143632	0.999992	-0.0215429	0.999639	-0.0241276	0.950841	-0.0894268	0.78748	-0.184898	0.899633
8430429K09Rik	0.0591344	0.999992	-0.0886893	0.999639	-0.0330082	0.945096	-0.255304	0.535299	-0.451749	0.544342
8430431K14Rik	0.0173498		0.115115	0.999639	-1.11942	0.178129	-0.1887	0.835319	-0.618942
9030025P20Rik	-0.0537963	0.999992	-0.0724231	0.999639	-0.625429	0.0209859	-0.783119	0.00187073	-0.505585	0.452777
9030612E09Rik			0.0163751	0.999639			0.289781		-0.131051
9030617O03Rik	-0.0137696	0.999992	0.0357832	0.999639	0.0948527	0.771499	0.114456	0.775603	-0.500477	0.587895
9030619P08Rik			0.0135707	0.999639			0.24385		-0.159387
9030624J02Rik	0.0658227	0.999992	-0.0715697	0.999639	-0.376257	0.0224125	-0.50216	0.0123698	-0.0014623	0.997468
9130008F23Rik	-0.00925405		0.11879	0.999639	-0.207142	0.819963	0.388221	0.636999	-0.0189463
9130011E15Rik	0.0562965	0.999992	0.0356193	0.999639	-0.668035	0.00117754	-0.645476	0.0113566	-0.111712	0.879565
9130019O22Rik	-0.103646	0.999992	-0.119426	0.999639	0.20619	0.421489	-0.0059093	0.987364	-0.0524571	0.965208
9130019P16Rik	-0.0259091		0.0241682	0.999639	-1.93038	0.00871125	-1.72074	0.0229906	-0.0296684
9130023H24Rik	0.0591737	0.999992	-0.0110003	0.999639	0.2813	0.466786	0.232255	0.560996	-0.171479	0.859281
9130024F11Rik	0.0318301		0.0952229	0.999639	0.388595		1.05604		1.01243	0.247057
9130204L05Rik			0.0130379	0.999639			0.231711		-0.117421
9130209A04Rik
9130230L23Rik	-0.0615581	0.999992	-0.0836365	0.999639	-0.954283	0.03319	-1.25103	0.00447495	-0.184741	0.884638
9130401M01Rik	0.00634059	0.999992	-0.0942582	0.999639	0.51632	0.0443382	0.3515	0.194693	-0.0927349	0.916955
9130409I23Rik			-0.0104119	0.999639	0.214265				-0.0766352
9230102K24Rik
9230104L09Rik	-0.00926071				-0.318149		-0.293793		-0.159387
9230110C19Rik	-0.0148681		0.185563	0.999639	-0.380195	0.607884	0.374999	0.573709	-0.243689
9230110F15Rik									-0.10944
9230113P08Rik			0.00310336	0.999639	0.214265		0.250342		-0.506917
9230114K14Rik	0.12227	0.999992	-0.00224045	0.999639	0.75849	0.11095	0.731617	0.127233	-0.13574	0.901062
9230116N13Rik	-0.0695218	0.999992	0.0286796	0.999639	-0.209355	0.722413	-0.151036	0.806603	-0.171512	0.895664
9330020H09Rik	-0.0801836	0.999992	0.0419769	0.999639	-0.139293	0.791708	-0.0766307	0.898064	0.398606	0.683435
9330111N05Rik	-0.00748557		-0.0357797	0.999639	-0.0653199		-0.467512		-0.0385122
9330151L19Rik	-0.0779058	0.999992	0.0179135	0.999639	-0.636327	0.0572582	-0.619504	0.103484	0.0821172	0.950539
9330158H04Rik	0.0534619	0.999992	0.144106	0.999639	-0.945789	0.0920402	-0.51494	0.325788	0.114368	0.941758
9330159F19Rik	0.0339805	0.999992	0.119671	0.999639	-1.08606	0.121337	-0.425694	0.54297	-0.635327	0.561776
9330175E14Rik	-0.0150263	0.999992	0.174403	0.999639	-1.33165	0.00122952	-0.866987	0.0411129	0.513396	0.613658
9330182L06Rik	0.0108886		-0.035015	0.999639	2.73255	0.000135913	2.68958	0.000344622	-0.502524
9430007A20Rik	0.00741789		0.0135707	0.999639			0.24385		-0.159387
9430008C03Rik	-0.0151038	0.999992	0.0287599	0.999639	0.319794	0.0311377	0.317084	0.232048	0.227963	0.799237
9430015G10Rik	0.155366	0.999992	-0.172283	0.999639	0.165581	0.425671	-0.0842558	0.768793	0.279866	0.773291
9430016H08Rik	-0.0472984	0.999992	-0.0416354	0.999639	0.841145	0.0179303	0.753519	0.0400176	-0.0742544	0.950539
9430020K01Rik	0.0333049	0.999992	0.102215	0.999639	2.38169	6.89776e-17	2.48806	3.87261e-18	0.0508486	0.974697
9430021M05Rik			-0.0104119	0.999639	0.214265				-0.154879
9430038I01Rik	-0.0748528	0.999992	0.0626775	0.999639	0.193824	0.464404	0.243852	0.347928	-0.0562231	0.950927
9430041J12Rik	0.0563821		0.0339477	0.999639			0.550752		-0.386642
9430060I03Rik	-0.0606397		0.176747	0.999639	-0.312447	0.694155	0.442243	0.491475	-0.43175
9430076C15Rik	-0.00195054		0.00922017	0.999639	-0.664095	0.446949	-0.551051		-0.442954
9430083A17Rik	0.0786661		0.0339031	0.999639	0.598055	0.418176	0.72902	0.304505	-0.628079
9530002B09Rik	0.00766811		0.0139419	0.999639			0.250342		-0.346662
9530003J23Rik	-0.00926071		-0.0112071	0.999639	-0.0888195		-0.293793		-0.172755
9530026P05Rik	0.152792	0.999992	0.0924036	0.999639	-0.565112	0.188805	-0.410783	0.362425	-0.133439	0.904562
9530036O11Rik	0.0406608		0.0182363	0.999639	-0.304045		-0.122281		-0.726084
9530053A07Rik	0.0235785		-0.0609633	0.999639	-0.0689437	0.940642	-0.660322	0.440024	-0.75626
9530059O14Rik	-0.0169501				-0.99948		-1.05641		0.148066
9530068E07Rik	0.0210016	0.999992	-0.136158	0.999639	0.621665	4.17154e-06	0.438182	0.00614741	-0.312415	0.501179
9530077C05Rik	0.107716	0.999992	-0.00100006	0.999639	0.578414	0.147194	0.543722	0.21495	0.271533	0.828503
9530082P21Rik	0.0436769		-0.0317921	0.999639	-0.744312	0.302499	-0.993021	0.16651	-0.587824
9530091C08Rik	-0.0369224	0.999992	0.0350725	0.999639	-0.681682	0.204698	-0.603087	0.264099	-0.164688	0.911381
9630013A20Rik	-0.00691878		-0.00291909	0.999639	-0.305848		-0.252676		-0.102625
9630028H03Rik			0.0139419	0.999639			0.250342		-0.14645
9630033F20Rik	-0.128612	0.999992	-0.17135	0.999639	0.558337	0.00747578	0.302422	0.218764	-0.282266	0.815785
9830107B12Rik	0.00871971		0.0770666	0.999639	-0.362774	0.691619	0.217848	0.810051	0.183857
9830147E19Rik	0.182198	0.999992	0.0268989	0.999639	0.68618	0.0985706	0.719634	0.0795382	0.28557	0.837314
9930012K11Rik	0.00286331	0.999992	0.0942966	0.999639	-1.22647	0.014434	-0.976171	0.0304468	-0.0571826	0.970712
9930014A18Rik	0.0230081	0.999992	0.0946979	0.999639	-0.294748	0.701512	0.106224	0.881178	0.570578	0.631674
9930021J03Rik	0.0680891	0.999992	0.0531178	0.999639	0.270988	0.073555	0.303071	0.098302	0.135487	0.839189
9930104L06Rik	-0.0516536	0.999992	-0.200286	0.999639	-0.534621	0.00464776	-0.84094	9.96273e-05	-0.0488113	0.95069
9930111J21Rik1	0.099551	0.999992	0.0690288	0.999639	-0.730475	8.53776e-10	-0.679879	4.65796e-06	-0.304611	0.703873
9930111J21Rik2	-0.0281509		-0.000132354	0.999639	-0.588907	0.406097	-0.64797	0.347928	-0.431458
a	0.0422322		0.0873565	0.999639	-0.298967		0.662028		-0.560212
A130010J15Rik	0.0090321	0.999992	-0.0183374	0.999639	-0.48184	0.010994	-0.531809	0.0228009	-0.113269	0.873315
A130040M12Rik	0.125037	0.999992	0.166832	0.999639	0.136861	0.344846	0.394939	0.292142	0.192586	0.836555
A1bg									-0.159387
A1cf	0.00930477		0.0179473	0.999639	-0.280203		0.124802		-0.201082
A230020J21Rik	-0.0224446		0.00929602	0.999639	-0.0983832	0.920067	-0.0484301		-0.498431
A230046K03Rik	0.00320455	0.999992	-0.108635	0.999639	-0.24131	0.229238	-0.410091	0.0714023	-0.329875	0.571267
A230050P20Rik	0.059942	0.999992	0.108815	0.999639	0.342415	0.136271	0.445298	0.159792	1.02639	0.0733478
A230056P14Rik	0.0534588		-0.01759	0.999639	0.306545	0.724785	0.187752	0.838772	-0.519411
A230057D06Rik			0.0139419	0.999639			0.250342		-0.171076
A230065H16Rik	0.0263017								-0.10944
A230072C01Rik	0.0225608	0.999992	-0.071446	0.999639	-0.366281	0.235162	-0.52043	0.0868959	-0.218802	0.768657
A230072E10Rik	0.0494594	0.999992	-0.12436	0.999639	-0.379909	0.308464	-0.663569	0.0902067	-0.517824	0.552574
A230073K19Rik	0.0667235	0.999992	-0.05448	0.999639	-0.237938	0.559686	-0.389814	0.322006	-0.423505	0.720077
A2m	0.000453335				-0.280203		-0.250805		-0.460459
A330023F24Rik	0.0789808	0.999992	0.057513	0.999639	-2.929	2.6399e-38	-2.76678	1.5605e-22	-0.260534	0.842149
A330035P11Rik	-0.00642406	0.999992	0.0233474	0.999639	-0.718847	0.112283	-0.65548	0.204409	-0.365383	0.720077
A330040F15Rik	-0.0629912	0.999992	-0.00679323	0.999639	-0.547422	0.194701	-0.576279	0.288259	-0.457995	0.677113
A330050F15Rik	-0.00797549				-0.280203		-0.250805		-0.102625
A330069E16Rik	0.101404	0.999992	0.0810375	0.999639	-0.116855	0.814599	0.052266	0.92494	-0.045837	0.969015
A330076H08Rik			0.0235162	0.999639	0.236952		0.518934		-0.408781
A3galt2	0.0987695	0.999992	0.00669574	0.999639	-1.60811	0.0168168	-1.61013	0.0118832	-0.900781
A430005L14Rik	-0.215225	0.999992	-0.0306282	0.999639	-0.016902	0.964684	-0.0979641	0.788425	-0.135169	0.930117
A430033K04Rik	0.0610775	0.999992	-0.00881311	0.999639	-0.350013	0.1462	-0.39072	0.129424	0.000499837	0.999664
A430078G23Rik	0.0474279	0.999992	-0.0143639	0.999639	-0.810733	2.6209e-09	-0.847631	0.00261924	0.437665	0.529818
A430089I19Rik			0.0135707	0.999639			0.24385		-0.0807744
A430093F15Rik	-0.0370284	0.999992	0.0337374	0.999639	-1.60327	0.0149081	-1.47423	0.0198121	-0.885684	0.359349
A430105I19Rik	0.0286069		0.523889	0.506697	0.780279	0.209735	1.86215	0.000250741	0.627415	0.582797
A4galt	-0.047875	0.999992	0.0452527	0.999639	-1.14861	0.0998934	-0.879714	0.204566	0.268074
A4gnt									-0.163885
A530013C23Rik	0.0461499		-0.044546	0.999639	0.0403716	0.96676	-0.494946		-0.147777
A530016L24Rik	-0.00926071				-0.318149		-0.293793		-0.0950052
A530032D15Rik	0.115725	0.999992	0.106886	0.999639	-1.29422	2.07927e-09	-1.08102	0.00101395	-1.96716	0.000431757
A530053G22Rik									-0.130939
A530054K11Rik	-0.0363116	0.999992	0.0813426	0.999639	-0.126836	0.542258	-0.0278334	0.938052	-0.434773	0.379704
A530058N18Rik	0.00913396								-0.17956
A530064D06Rik	0.00668099	0.999992	0.110907	0.999639	-0.901195	0.138002	-0.514948	0.397453	-0.15564	0.920801
A530088E08Rik	0.0638733	0.999992	-0.00631867	0.999639	-1.14018	0.00600677	-1.16263	0.0177686	-0.467141	0.68737
A530099J19Rik	0.0315139		-0.0140424	0.999639	0.351555		0.269706		0.161972
A630001G21Rik	0.0581713	0.999992	0.103229	0.999639	-0.936084	7.44067e-10	-0.833596	0.000167315	-0.0728513	0.937588
A630010A05Rik	0.0283795	0.999992	0.034211	0.999639	-1.01065	0.0695012	-0.914025	0.0924257	0.117752	0.942151
A630033H20Rik	-0.0557217	0.999992	0.319823	0.999639	-0.449079	0.0257821	0.202225	0.655921	-1.22186	0.0217316
A630066F11Rik	0.0266423		0.158369	0.999639	0.360985	0.584871	0.830215	0.166891	-0.531077	0.646422
A630072M18Rik	0.00706508	0.999992	-0.0322585	0.999639	-0.798206	0.000364051	-0.880533	2.05797e-05	-0.260998	0.694764
A630073D07Rik	-0.0395116	0.999992	-0.0701152	0.999639	-0.45348	0.368712	-0.686033	0.152677	-0.0772253	0.958338
A630075F10Rik	0.0516122	0.999992	-0.104569	0.999639	-0.433929	0.386302	-0.767678	0.115934	-0.260851	0.846942
A630089N07Rik	0.172273	0.999992	0.135956	0.999639	0.225613	0.217642	0.371059	0.0911971	0.0355756	0.96846
A630095E13Rik									-0.25926
A730008H23Rik	0.084763	0.999992	-0.242793	0.999639	1.14088	2.6445e-07	0.744505	0.00513531	-0.141908	0.897811
A730017C20Rik									-0.102625
A730017L22Rik	0.000130839	0.999992	-0.0288831	0.999639	-0.285902	0.105316	-0.352588	0.0722721	-0.203111	0.716525
A730018C14Rik									-0.201082
A730020M07Rik	0.00741789								-0.272626
A830010M20Rik	0.0705238	0.999992	0.0604264	0.999639	1.31182	5.39296e-09	1.35949	2.87235e-07	-0.142249	0.856263
A830018L16Rik	0.0366888		0.0566082	0.999639	-0.572278	0.428585	-0.342768	0.629909	-0.0613106
A830080D01Rik	0.0962068	0.999992	0.133804	0.999639	-0.285217	0.231318	-0.0999677	0.771801	0.225384	0.770645
A830082N09Rik	-0.021134	0.999992	-0.202323	0.999639	-0.250616	0.596523	-0.744568	0.104157	-0.312907	0.729486
A930003A15Rik	-0.00500993				-0.368793		-0.353359		-0.14645
A930003O13Rik	0.0114396		0.0291096	0.999639	-0.863561	0.304505	-0.64376		-0.343405
A930004D18Rik	-0.0226117		0.0483799	0.999639	-0.0270607		0.378262		0.21456
A930005H10Rik	-0.0810043	0.999992	-0.0322377	0.999639	-0.367885	0.198806	-0.452347	0.112688	-0.200063	0.820347
A930007I19Rik	-0.0460828	0.999992	0.145421	0.999639	-0.592543	0.134784	-0.276637	0.575185	-0.198061	0.803893
A930011G23Rik	0.0279318		0.0139419	0.999639	-0.875059		-0.690338		-0.665504
A930012L18Rik	0.00339691		0.03504	0.999639	-0.970426	0.216384	-0.742596	0.345677	-0.988575
A930013F10Rik	0.0897785	0.999992	0.127693	0.999639	-0.980153	0.000490757	-0.770789	0.0320839	-0.452881	0.611927
A930015D03Rik	0.0285852	0.999992	-0.0308477	0.999639	-1.18923	0.00197337	-1.30224	0.000731476	0.216832	0.854108
A930017M01Rik	0.00741789		0.0240211	0.999639			0.404275		-0.0935831
A930018P22Rik			0.0135707	0.999639			0.24385
AA387883									-0.120935
AA388235	0.0961034	0.999992	0.244783	0.999639	-0.293666	0.381525	0.0810802	0.813127	-0.956197	0.056284
AA415398	0.0757944	0.999992	0.00314925	0.999639	-0.994328	0.0624466	-1.01956	0.0599492	-0.136723	0.931611
AA465934	-0.0186736		0.0942002	0.999639	1.20289	0.0550198	1.52461	0.00831976	0.125105	0.934033
AA467197	0.0224948		-0.0503784	0.999639	-0.430893	0.530276	-0.699947	0.29543	-0.395618
AA474331	-0.0980305		0.0106567	0.999639	0.200523	0.771284	0.203425	0.769391	0.0162973	0.989437
AA543186	0.0672777		0.0819613	0.999639	-0.101484	0.886588	0.155125	0.815135	-0.583709
AA545190
AA619741									-0.159387
AA792892	-0.0139593				-0.62836		-0.684342		-0.102625
AA986860	0.0299474		0.132078	0.999639	-0.0253656	0.979804	0.743584	0.366065	-0.934542
Aaas	-0.0133488	0.999992	-0.159233	0.999639	0.654353	4.35842e-05	0.428239	0.0268445	0.289411	0.455166
Aacs	-0.076108	0.999992	-0.145321	0.999639	-0.0105462	0.964543	-0.268997	0.337621	0.261201	0.620492
Aadac			0.0139419	0.999639			0.250342		-0.183837
Aadacl2									-0.151476
Aadacl3	0.0078276								-0.125491
Aadat									0.144442
Aaed1	-0.229312	0.999992	-0.0589577	0.999639	0.0306352	0.937125	-0.115543	0.783826	-0.760143	0.099242
Aagab	0.049681	0.999992	-0.0598194	0.999639	0.218559	0.175694	0.118019	0.565675	-0.208412	0.674253
Aak1	0.0281944	0.999992	-0.0981568	0.999639	-0.808181	1.68146e-10	-0.955955	1.10286e-07	0.154508	0.845077
Aamdc	-0.0123457	0.999992	-0.043759	0.999639	1.09079	0.00742292	0.977668	0.0221071	-0.367508	0.696161
Aamp	-0.102612	0.999992	-0.0293513	0.999639	0.330933	0.0342151	0.263376	0.109252	-0.092474	0.89307
Aanat	0.0462896	0.999992	0.0566711	0.999639	-1.75128	0.00143916	-1.32594	0.0255056	-0.790972
Aar2	-0.102061	0.999992	-0.1431	0.999639	0.226581	0.203816	0.0162098	0.949366	0.0621224	0.945376
Aard	0.00994505		0.0183085	0.999639			0.308003		0.0371303
Aars	-0.0174066	0.999992	-0.171349	0.999639	0.913064	1.74684e-08	0.671914	0.000171528	0.351338	0.402659
Aars2	0.0375281	0.999992	-0.107005	0.999639	0.44019	0.0265355	0.268156	0.299902	0.575911	0.280994
Aarsd1	-0.0363107	0.999992	-0.234582	0.999639	1.24871	3.69664e-11	0.931463	4.03139e-06	0.322203	0.428195
Aasdh	0.0414469	0.999992	-0.0125009	0.999639	-0.182621	0.367776	-0.234356	0.346053	0.0510222	0.957334
Aasdhppt	-0.149513	0.999992	0.168786	0.999639	0.4927	0.0175704	0.748556	0.0507629	-0.343718	0.630146
Aass			0.00224104	0.999639	0.214265		0.24385		-0.175594
Aatf	0.115093	0.999992	-0.169683	0.999639	0.857869	2.85455e-07	0.606522	0.00339472	0.388828	0.484574
Aatk	0.0307062	0.999992	0.0395446	0.999639	-1.52483	0.00775247	-1.39533	0.0149932	0.315611	0.79096
AB124611	-0.0656089	0.999992	0.178548	0.999639	-0.097016	0.587736	0.081917	0.65649	-0.187205	0.80014
Abat	0.0294892	0.999992	0.0302917	0.999639	-0.509452	0.430314	-0.430993	0.49947	-0.96049
Abca1	-0.0159631	0.999992	0.121064	0.999639	-2.24285	1.82939e-48	-2.05239	2.26093e-19	-0.980147	0.292978
Abca12	0.0586163	0.999992	0.0470595	0.999639	-0.647114	0.00820204	-0.609067	0.0151891	-0.252868	0.79096
Abca13	0.0166984		0.138983	0.999639	0.323427	0.722988	1.23625	0.105548	-0.152141	0.920545
Abca14	-0.00162207				-0.318149		-0.293793		-0.547048
Abca15	0.0129022								-0.223394
Abca16	0.0078276		0.0456583	0.999639			0.717429		-0.480522
Abca17	0.0426219		-0.00443614	0.999639	-0.736766	0.382032	-0.852376	0.314227	-0.788487
Abca2	0.0192455	0.999992	0.0614417	0.999639	-0.765239	1.352e-07	-0.707583	0.00119246	-0.579963	0.481914
Abca3	-0.00361992	0.999992	-0.0106637	0.999639	-0.849804	7.25169e-10	-0.886573	0.000430264	-0.495611	0.605814
Abca4	-0.00926071		0.0179473	0.999639	-0.318149		0.0531246		-0.768741
Abca5	0.0593082	0.999992	0.0775278	0.999639	-1.45632	0.0070787	-1.20558	0.0201276	-1.12129
Abca6	-0.129534	0.999992	0.012522	0.999639	-1.69239	0.00180878	-1.6042	0.00698553	-0.744648
Abca7	0.0284316	0.999992	0.0768059	0.999639	-1.16618	3.70843e-16	-1.05349	0.000230909	0.00596984	0.994556
Abca8a	0.016566		0.0469117	0.999639	-0.204718	0.830762	0.13897		-0.163465
Abca8b	0.0568382	0.999992	0.112246	0.999639	-0.844669	0.149457	-0.475668	0.392151	-0.411817
Abca9	-0.0858994	0.999992	0.0419334	0.999639	-1.94857	0.000135801	-1.82316	0.000292779	-0.152959	0.921537
Abcb10	-0.0210079	0.999992	0.011988	0.999639	-0.75566	4.36753e-05	-0.770852	0.000128775	-0.488245	0.66559
Abcb11	0.00913396		0.0179473	0.999639			0.331664		-0.328207
Abcb1a	-0.0157003		-0.0555954	0.999639	-1.58298	0.0325704	-2.15021	0.00641189	-0.805621	0.439967
Abcb1b	0.0185428	0.999992	-0.128548	0.999639	0.0601819	0.902506	-0.223201	0.635861	-0.955093	0.298006
Abcb4	0.180796	0.999992	0.256417	0.999639	0.395412	0.299138	0.853261	0.00625797	-0.253117	0.829076
Abcb5	0.0144904		-0.0295375	0.999639	0.370984		-0.033824		0.0332887
Abcb6	0.0434134	0.999992	-0.0105638	0.999639	1.49674	3.17796e-10	1.44375	1.44177e-07	0.35436	0.611983
Abcb7	0.0482918	0.999992	0.0802653	0.999639	0.594577	9.06026e-05	0.676108	0.0209611	-0.177453	0.859281
Abcb8	0.0518987	0.999992	-0.102494	0.999639	1.17869	1.74201e-10	1.00503	1.22792e-05	0.247755	0.653419
Abcb9	0.0351801	0.999992	-0.116921	0.999639	-0.768218	0.0741457	-1.11875	0.00782565	0.0488888	0.971104
Abcc1	0.0418194	0.999992	0.0160756	0.999639	-1.12538	1.36443e-10	-1.10447	0.000327506	-0.466784	0.695749
Abcc10	0.0310025	0.999992	0.100516	0.999639	-1.17605	7.3762e-08	-0.935954	0.0150334	0.23176	0.81711
Abcc12			0.0339477	0.999639			0.550752		-0.319169
Abcc2	0.0163444		-0.00971358	0.999639	0.348113		0.250342		-0.403671
Abcc3	0.00522874	0.999992	-0.0102567	0.999639	-1.19713	0.0865077	-1.46487	0.0034512	0.0179483	0.989154
Abcc4	0.0511426	0.999992	-0.00416949	0.999639	-0.228156	0.231318	-0.268709	0.38879	-0.15225	0.882783
Abcc5	-0.00343721	0.999992	-0.115538	0.999639	-0.176275	0.417651	-0.362174	0.120086	-0.0203097	0.982188
Abcc6	-0.018429				-0.62836		-0.684342		-0.172755
Abcc8	-0.00609304		0.0106201	0.999639	-0.0685803		0.0925395		-0.291917
Abcc9	0.0609773	0.999992	0.0448438	0.999639	-0.730057	0.156587	-0.648284	0.163657	-0.32014	0.780593
Abcd1	0.0854531	0.999992	-0.0367802	0.999639	0.0380204	0.782662	-0.039713	0.845801	-0.139022	0.729486
Abcd2	0.14637	0.999992	0.00697522	0.999639	-0.568485	0.184468	-0.578682	0.194153	0.0557044	0.966141
Abcd3	-0.00238993	0.999992	-0.1098	0.999639	0.450915	0.0314941	0.269617	0.313334	-0.343183	0.726956
Abcd4	0.0899564	0.999992	0.154618	0.999639	-0.778021	0.000910059	-0.556366	0.0623313	0.312658	0.775182
Abce1	-0.0405887	0.999992	0.105048	0.999639	1.1404	4.04848e-23	1.24133	7.51955e-05	-0.177442	0.803893
Abcf1	0.0337278	0.999992	-0.0198274	0.999639	0.738973	1.51798e-11	0.681404	6.00715e-07	0.413588	0.406587
Abcf2	-0.0799237	0.999992	-0.059638	0.999639	1.24255	8.36212e-16	1.11452	7.591e-07	0.205197	0.687731
Abcf3	0.0304975	0.999992	-0.0476911	0.999639	-0.188391	0.169747	-0.278955	0.0946927	0.125921	0.854108
Abcg1	-0.116971	0.999992	-0.0078496	0.999639	-1.06445	4.57948e-10	-1.10583	1.37413e-07	-0.352326	0.776105
Abcg2	-0.00255618		-0.0856348	0.999639	0.987695	0.0742728	0.694182	0.295361	-0.654915	0.56604
Abcg3	0.0328686	0.999992	-0.0281224	0.999639	-1.29674	1.31699e-05	-1.3656	0.000214569	-0.234189	0.865615
Abcg4	0.0191088		0.0266954	0.999639	0.969229	0.249562	1.43969	0.0822851	0.172989
Abcg5	0.00766811								-0.0137882
Abcg8	0.0220487		0.131713	0.999639	-0.758628		0.314518	0.737651	-0.206211
Abhd1	4.68158e-05		-0.0269499	0.999639	-0.556412	0.47941	-0.77878	0.32283	0.139424
Abhd10	-0.0254425	0.999992	-0.056931	0.999639	-0.035466	0.914158	-0.1508	0.69169	-0.344344	0.548887
Abhd11	0.084847	0.999992	0.0417605	0.999639	0.433024	0.0381716	0.4547	0.0275552	-0.0344902	0.973192
Abhd11os	0.027839		-0.0355702	0.999639	0.290341	0.705422	0.0688109	0.940902	0.0883527
Abhd12	-0.0401127	0.999992	0.161192	0.999639	-0.659911	6.20559e-05	-0.482221	0.0200722	-0.165916	0.886546
Abhd13	-0.0195115	0.999992	0.0208735	0.999639	0.366013	0.0136855	0.360934	0.190662	-0.202378	0.730477
Abhd14a	-0.0543815	0.999992	-0.0388412	0.999639	2.57635	2.22603e-17	2.50527	1.57587e-16	0.110873	0.90273
Abhd14b	-0.0103409	0.999992	-0.110047	0.999639	-0.359654	0.343753	-0.636871	0.128787	-0.332157	0.746848
Abhd15	-0.0240984	0.999992	0.0912345	0.999639	-0.393075	0.328481	-0.1913	0.74176	0.64665	0.336929
Abhd16a	-0.0298417	0.999992	-0.0167701	0.999639	-0.233135	0.23471	-0.288629	0.155621	0.106527	0.886546
Abhd16b	-0.0297581		0.0325484	0.999639	-0.779835		-0.365779		0.237246
Abhd17a	0.0151928	0.999992	-0.0464173	0.999639	0.729059	6.99152e-06	0.629833	0.00664823	0.0444061	0.960712
Abhd17b	0.0204353	0.999992	0.142469	0.999639	-0.327838	0.0265113	-0.158293	0.545267	-0.685974	0.186547
Abhd17c	-0.0359557	0.999992	-0.145976	0.999639	1.26061	9.71131e-08	1.04785	0.000611042	0.225435	0.780593
Abhd2	0.0179162	0.999992	0.0495511	0.999639	-0.82985	5.79661e-12	-0.797441	1.64652e-06	-0.0734838	0.943796
Abhd3	-0.00926071				-0.318149		-0.293793		-0.320516
Abhd4	-0.0049991	0.999992	-0.0797263	0.999639	-0.38252	0.288039	-0.576451	0.1801	-0.35112	0.711512
Abhd5	0.0243662	0.999992	0.0714701	0.999639	-0.249298	0.502366	-0.155681	0.705643	-0.7851	0.201299
Abhd6	0.0793605	0.999992	0.0484966	0.999639	-1.38983	0.000119666	-1.22153	0.00921352	-1.0633	0.242135
Abhd8	-0.0400713	0.999992	-0.156471	0.999639	0.589495	0.00530795	0.36088	0.146406	0.22021	0.829076
Abi1	-0.0245188	0.999992	0.182385	0.999639	0.0577272	0.710746	0.308416	0.347841	-0.276923	0.68902
Abi2	0.033398	0.999992	0.256835	0.999639	-0.563449	0.102668	-0.0967829	0.825131	-0.945367	0.292978
Abi3	0.0614982	0.999992	-0.149153	0.999639	-0.539666	0.0261168	-0.814272	0.00596149	0.030565	0.96846
Abi3bp	0.0207252	0.999992	0.0206315	0.999639	-0.51263	0.43915	-0.46877	0.479645	-0.836451	0.39241
Abl1	0.057448	0.999992	-0.105708	0.999639	0.267478	0.0138645	0.109544	0.552051	0.618303	0.0625187
Abl2	0.0266745	0.999992	-0.00760253	0.999639	-0.172422	0.183614	-0.212102	0.133488	0.210983	0.658247
Ablim1	0.0274325	0.999992	-0.0206809	0.999639	-0.545129	1.96309e-09	-0.59882	0.000468959	0.0643876	0.928439
Ablim2	0.0136342		-0.000261986	0.999639	-0.0354991		-0.076279		-1.09688	0.197481
Ablim3	0.0170203		0.00310336	0.999639	0.214265		0.250342		-0.15446
Abo			0.0139419	0.999639			0.250342		-0.00750874
Abr	0.0319205	0.999992	0.00449026	0.999639	-1.64475	2.09663e-21	-1.64284	8.6643e-10	-0.731824	0.481083
Abra	0.0106135		-0.00243992	0.999639	-0.480834	0.569523	-0.554383	0.488168	-0.00986459
Abracl	-0.00777277	0.999992	0.200981	0.999639	0.549818	0.00933383	0.936747	0.0325987	-0.355703	0.544342
Abt1	0.0605683	0.999992	-0.0387784	0.999639	0.343268	0.0826153	0.256078	0.313639	0.240418	0.613658
Abtb1	0.0308077	0.999992	0.0628996	0.999639	-0.36438	0.0359834	-0.318443	0.0884587	0.105272	0.891254
Abtb2	0.0431168	0.999992	-0.0227827	0.999639	-1.09353	1.56835e-05	-1.15615	0.000397388	0.0661582	0.961928
Acaa1a	0.0321991	0.999992	-0.0547581	0.999639	0.145638	0.53041	0.0332978	0.919634	0.111687	0.878605
Acaa1b	0.00513979		-0.0681389	0.999639	0.596175		-0.293793		0.0772404
Acaa2	0.012592	0.999992	-0.0441837	0.999639	1.21576	2.16672e-08	1.12799	2.36726e-08	-0.148127	0.879319
Acaca	0.0430221	0.999992	-0.153262	0.999639	1.20503	8.2476e-25	1.00034	1.39742e-15	0.168073	0.760761
Acacb	0.0135205		0.190992	0.999639	1.6695	0.00336084	2.04001	0.00250641	0.59909	0.605955
Acad10	-0.09333	0.999992	-0.0528929	0.999639	-0.857198	0.00263983	-0.988614	0.00516077	0.0436205	0.961928
Acad11	-0.202837	0.999992	-0.187885	0.999639	-0.160949	0.608188	-0.496966	0.086938	-0.0411285	0.96846
Acad12	0.0147821	0.999992	0.133589	0.999639	-1.06831	0.0157894	-0.667856	0.172671	-0.170445	0.888528
Acad8	0.0966645	0.999992	-0.146095	0.999639	1.48448	1.01667e-05	1.2178	0.000233413	0.154921	0.908238
Acad9	0.166992	0.999992	0.125726	0.999639	-0.276867	0.0455702	-0.148588	0.533829	-0.166666	0.766707
Acadl	0.108212	0.999992	-0.0237693	0.999639	0.305928	0.183924	0.244006	0.32372	0.12948	0.91605
Acadm	0.0430257	0.999992	-0.12505	0.999639	0.0780728	0.732695	-0.117414	0.57587	-0.160945	0.79096
Acads	-0.117421	0.999992	0.00233202	0.999639	1.08861	4.57838e-07	1.0544	8.89293e-05	-0.10262	0.901062
Acadsb	0.00426056	0.999992	-0.0181528	0.999639	-0.762479	0.0173375	-0.835488	0.00843774	-0.651001	0.418933
Acadvl	-0.0348908	0.999992	-0.0339827	0.999639	0.176089	0.373858	0.100437	0.647919	-0.08819	0.901183
Acan	0.00687538				-0.280203		-0.250805		-0.309931
Acap1	0.06111	0.999992	0.0991661	0.999639	-0.907685	1.27557e-13	-0.815776	4.62113e-05	0.34519	0.591944
Acap2	0.0612641	0.999992	-0.0408127	0.999639	-0.580687	9.44771e-07	-0.65867	1.49894e-06	-0.112452	0.895694
Acap3	0.0422964	0.999992	-0.0383823	0.999639	0.396898	0.0320315	0.305449	0.239291	0.216732	0.803633
Acat1	0.0201381	0.999992	0.149604	0.999639	0.729733	9.70071e-05	0.903896	6.77923e-05	0.0133987	0.987338
Acat2	0.016097	0.999992	-0.172117	0.999639	0.973344	0.000526495	0.659015	0.0240137	-0.0658173	0.941264
Acat3	-0.114984	0.999992	0.137712	0.999639	0.347679	0.490839	0.632442	0.193168	-0.620883	0.458812
Acbd3	0.0051619	0.999992	0.0126404	0.999639	-0.354271	0.037903	-0.369293	0.0315852	0.127179	0.800755
Acbd4	0.0111667	0.999992	0.0459327	0.999639	-0.834257	4.3648e-05	-0.792987	0.00148441	0.30304	0.715996
Acbd5	0.0289683	0.999992	0.126882	0.999639	-0.855276	3.6814e-07	-0.730387	0.000108546	-0.589386	0.127852
Acbd6	0.0352109	0.999992	0.0583087	0.999639	0.954836	0.000117528	1.0022	0.000228125	0.482409	0.317171
Acbd7			-0.0289926	0.999639	0.698798		0.331664		-0.109832
Accs	-0.149491	0.999992	0.0578355	0.999639	-1.14385	0.000559948	-1.05034	0.00213979	-0.0231308	0.981065
Accsl									-0.188595
Acd	0.0816412	0.999992	-0.0958923	0.999639	-0.0309184	0.865351	-0.184563	0.382213	0.19545	0.768657
Ace	-0.124436	0.999992	-0.0578949	0.999639	-0.762032	0.151385	-0.955392	0.0784592	0.43615	0.72695
Ace2									-0.321618
Acer1	0.0723215	0.999992	0.0669743	0.999639	-0.288653	0.652679	-0.113542	0.861028	-0.565605	0.617549
Acer2	0.0083653	0.999992	0.202601	0.999639	0.176261	0.565341	0.442609	0.129786	-0.0833179	0.937675
Acer3	0.0324939	0.999992	-0.0502805	0.999639	-0.644379	0.128739	-0.795312	0.0437206	-1.20991	0.0867832
Ache	0.00904833		0.1315	0.999639	0.665905	0.343223	1.32203	0.086587	-0.467084
Acin1	0.0826352	0.999992	0.0454197	0.999639	0.112819	0.368808	0.131173	0.490651	0.441595	0.477257
Ackr1	0.0147766		0.0661263	0.999639	0.110512		1.0079		0.1473
Ackr2	-0.00811935	0.999992	0.00705307	0.999639	-2.1042	7.54351e-10	-2.06588	1.44082e-06	-1.09362	0.18871
Ackr3	-0.00483699	0.999992	-0.0062672	0.999639	-1.78018	0.0010791	-1.80983	0.0022312	-0.0611005
Ackr4	0.000323947	0.999992	0.14353	0.999639	-1.67098	0.00183428	-1.17165	0.0174491	0.0210436	0.987464
Acly	-0.125086	0.999992	-0.0262952	0.999639	0.737335	1.53244e-07	0.671251	6.12348e-05	0.0439138	0.951041
Acmsd	0.026172	0.999992	0.192935	0.999639	-0.263465	0.669142	0.279611	0.635481	-0.309792	0.796532
Acn9	0.0105837	0.999992	0.055848	0.999639	0.397504	0.425671	0.524106	0.34828	0.132081	0.914647
Acnat1	0.123449	0.999992	-0.0757291	0.999639	-0.719123	0.0783637	-0.936962	0.0156165	-0.79225	0.312149
Acnat2	0.0078276		0.0262971	0.999639			0.440974		-0.211557
Aco1	-0.144849	0.999992	0.0354425	0.999639	-0.0134677	0.955777	-0.0048943	0.987364	0.245454	0.750115
Aco2	-0.0945898	0.999992	-0.043099	0.999639	0.805567	1.594e-07	0.717432	5.32624e-05	0.123327	0.836827
Acot1	0.0902034		0.112683	0.999639	0.561373	0.44297	1.00396	0.152011	0.294028	0.833386
Acot10	0.00803081		-0.130474	0.999639	0.650339	0.3358	0.176201	0.829635	-0.570179
Acot11	-0.0410875	0.999992	-0.0430726	0.999639	-0.989409	0.00194075	-1.11561	0.00110699	-0.138743	0.918793
Acot12	0.0078276								-0.440787
Acot13	-0.110709	0.999992	0.160871	0.999639	0.425057	0.267014	0.649929	0.0646173	-0.240549	0.746823
Acot2	-0.0557008	0.999992	0.0871241	0.999639	0.0366651	0.881855	0.118573	0.642328	0.63265	0.305026
Acot3			-0.0104119	0.999639	0.214265				-0.186195
Acot4	0.00180108		0.0308315	0.999639	0.389709		0.622266		-0.00232517
Acot5									-0.201082
Acot6	0.0356208		0.193194	0.999639	0.583437	0.307609	1.07089	0.0485679	0.222821	0.851156
Acot7	0.0172138		-0.211578	0.999639	2.8106	8.16859e-14	2.42595	7.57074e-11	-0.198905	0.815785
Acot8	-0.0216301	0.999992	-0.0865172	0.999639	-0.303034	0.220674	-0.462597	0.0690929	-0.10793	0.911381
Acot9	-0.113803	0.999992	-0.0380894	0.999639	-0.2311	0.343223	-0.309221	0.291789	-0.404111	0.613658
Acox1	0.0180989	0.999992	0.0369115	0.999639	-0.743203	0.000176274	-0.721912	0.00221826	-0.0189209	0.980091
Acox2	0.00461538				-0.475666		-0.525365
Acox3	-0.00454559	0.999992	0.037617	0.999639	-1.03478	9.36892e-18	-0.984744	0.000578165	-0.716369	0.358505
Acoxl	-0.00967255		-0.0361366	0.999639	0.221228	0.815868	-0.185535		0.607371
Acp1	-0.062313	0.999992	0.121592	0.999639	0.902953	5.68802e-07	1.06237	0.00180413	-0.233233	0.729486
Acp2	0.0280433	0.999992	-0.0395699	0.999639	-1.04482	1.75855e-06	-1.12397	0.000351519	-0.403673	0.711567
Acp5	-0.180162	0.999992	0.0930025	0.999639	-0.296929	0.501637	-0.133911	0.761758	-0.710301	0.242244
Acp6	-0.0850691	0.999992	-0.100951	0.999639	0.382026	0.0798235	0.215041	0.388274	0.284522	0.767453
Acpp	-0.0619794	0.999992	0.0982649	0.999639	-0.495542	0.207286	-0.326185	0.423413	-0.226235	0.841085
Acr			0.0130379	0.999639			0.231711		0.0294212
Acrbp	0.0643131	0.999992	0.0550204	0.999639	-1.13392	0.000743435	-0.991748	0.0146015	0.246933	0.850639
Acrv1	0.00664		0.0324935	0.999639	0.0619133	0.950526	0.341764		-0.360013
Acsbg1	0.0254228		0.215819	0.999639	-1.02828	0.197693	0.302198	0.703515	-0.921376	0.312982
Acsbg2	-0.0888158		-0.026599	0.999639	-0.846937	0.246907	-1.06095	0.154472	-0.207347
Acsf2	-0.0678658	0.999992	0.0510568	0.999639	-0.804415	5.10605e-08	-0.727296	0.0243017	0.144994	0.90622
Acsf3	-0.000374794	0.999992	0.017804	0.999639	-0.420441	0.0609236	-0.435012	0.0870638	0.124473	0.896733
Acsl1	0.053749	0.999992	0.0261379	0.999639	-0.0134942	0.957424	-0.0133402	0.961062	0.00717114	0.993835
Acsl3	-0.104334	0.999992	-0.14234	0.999639	0.495304	0.0725068	0.237861	0.497254	0.0704444	0.960967
Acsl4	-0.0879027	0.999992	0.15528	0.999639	-0.230261	0.219498	-0.0422881	0.889638	-0.255907	0.79743
Acsl5	-0.0816085	0.999992	-0.0923014	0.999639	0.996241	4.62409e-12	0.840516	8.57487e-05	-0.28473	0.619326
Acsl6	-0.00926071				-0.318149		-0.293793		-0.219367
Acsm1	-0.00797549		-0.0104119	0.999639	-0.0394241		-0.250805		0.101583
Acsm2	0.0670984	0.999992	0.101869	0.999639	-0.715179	0.295077	-0.318954	0.610917	-0.91721	0.33267
Acsm3	0.0206885		-0.159784	0.999639	0.838977	0.199249	0.184079	0.813034	-0.41894	0.729951
Acsm4	0.0347035		0.026779	0.999639	0.25362		0.466766		-0.00812854
Acsm5	0.0078276								-0.209805
Acss1	0.0476556	0.999992	-0.00102989	0.999639	-0.275053	0.010706	-0.30989	0.0705409	0.272931	0.524204
Acss2	0.111933	0.999992	0.0389004	0.999639	-0.747312	0.0245938	-0.687666	0.0982518	0.365359	0.746848
Acss3	0.0393168	0.999992	0.0945188	0.999639	-0.889594	0.139417	-0.585078	0.314488	-0.858924	0.357601
Acta1	-0.00346423		0.0226247	0.999639	-0.345118		-0.0456323		0.256649	0.833987
Acta2	0.131608	0.999992	0.228714	0.999639	-0.252792	0.625745	0.275447	0.629198	0.644248	0.527914
Actb	0.190977	0.999992	0.196434	0.999639	0.0467666	0.805213	0.367767	0.359069	0.255608	0.714314
Actbl2
Actc1	-0.00797549				-0.280203		-0.250805		0.418314
Actg1	0.0714198	0.999992	0.147511	0.999639	0.317041	0.0374557	0.493534	0.102633	0.025987	0.970231
Actg2	-0.0179905		-0.0190614	0.999639	-0.0111146		-0.244262		-0.253296
Actl10	-0.0151887		-0.168695	0.999639	1.24243	0.0420837	0.6907	0.314338	0.203186	0.878314
Actl11	0.0078276								-0.0137882
Actl6a	-0.038028	0.999992	-0.144248	0.999639	1.11768	9.99742e-12	0.893423	1.44386e-06	-0.120141	0.870292
Actl6b	-0.000365809		0.0183085	0.999639	-0.475666		-0.0604269		0.101583
Actl7a	-0.0218979		-0.0516854	0.999639	-0.172544	0.827555	-0.435077	0.563335	-0.161249
Actl7b	0.0146041		-0.00613522	0.999639	-0.486484	0.588467	-0.619284		-0.0257842
Actl9			0.0139419	0.999639			0.250342		-0.151476
Actn1	-0.0193438	0.999992	-0.218939	0.999639	-1.28847	7.52382e-07	-1.6881	1.03479e-06	0.689714	0.428195
Actn2	0.0435635		0.0856777	0.999639	-0.932839	0.179574	-0.540305	0.435592	0.180096	0.900434
Actn3	0.00994505		-0.0463068	0.999639	0.858126		0.250342		0.0389154
Actn4	-0.00953008	0.999992	-0.0369847	0.999639	0.857395	6.56487e-14	0.779287	4.10722e-08	0.427186	0.210489
Actr10	-0.144244	0.999992	0.0679534	0.999639	0.375731	0.0608814	0.435632	0.0779367	-0.124124	0.895664
Actr1a	-0.0849631	0.999992	-0.0574618	0.999639	0.387691	0.00354702	0.283107	0.145864	-0.0199005	0.978461
Actr1b	-0.082077	0.999992	-0.112991	0.999639	0.128988	0.416887	-0.0503331	0.843282	-0.158101	0.792496
Actr2	-0.0233481	0.999992	0.06504	0.999639	0.0828852	0.576482	0.137392	0.59486	-0.29293	0.580889
Actr3	0.0440918	0.999992	0.108017	0.999639	-0.113114	0.393047	0.0145738	0.968932	-0.3254	0.579101
Actr3b	-0.025003	0.999992	0.194128	0.999639	-0.0669572	0.903247	0.349405	0.411222	-0.113278	0.938107
Actr5	0.0725131	0.999992	-0.0327191	0.999639	-0.028358	0.888077	-0.105951	0.65649	0.503314	0.442696
Actr6	0.0572833	0.999992	-0.0130325	0.999639	0.766183	0.0104072	0.696723	0.110336	-0.27714	0.775387
Actr8	0.0238271	0.999992	-0.200539	0.999639	-0.0817377	0.713598	-0.362241	0.11284	-0.0596484	0.94136
Actrt1
Actrt2
Actrt3	-0.0191401		-0.0116625	0.999639	-0.430882		-0.704399		0.0294034
Acvr1	-0.0467563		-0.00681616	0.999639	-0.753452	0.374979	-0.967157	0.24044	-0.711135
Acvr1b	-0.0317437	0.999992	0.147453	0.999639	-1.02184	2.55196e-08	-0.824497	0.000511806	0.299573	0.694629
Acvr1c	-0.0152428		-0.00057384	0.999639	-0.303398		-0.275855		-0.477143
Acvr2a	0.189186	0.999992	0.168682	0.999639	-0.290028	0.259184	-0.0558728	0.875259	-0.728107	0.282685
Acvr2b	0.0296009		-0.129282	0.999639	2.21184	0.000114141	1.76103	0.00693839	1.06974	0.107924
Acvrl1	-0.0344044	0.999992	0.0836298	0.999639	-1.18956	0.0306966	-0.837095	0.220342	-1.19823	0.146594
Acy1	0.103658	0.999992	-0.000474804	0.999639	1.52938	2.79781e-12	1.49507	2.7288e-11	-0.230039	0.746848
Acy3	-0.00797549		0.0250349	0.999639	-0.0394241		0.310153		0.281309
Acyp1	-0.092405	0.999992	0.0811917	0.999639	0.512063	0.114307	0.616999	0.0315682	-0.0365849	0.975523
Acyp2	-0.050968		-0.0767871	0.999639	0.58742	0.447882	0.225474	0.794842	-0.0779223
Ada	0.179595	0.999992	-0.0647864	0.999639	-0.396343	0.115428	-0.542788	0.131269	0.395153	0.646424
Adad1	0.00741789		-0.0104119	0.999639	0.214265				-0.233942
Adad2	0.00830743								-0.224574
Adal	0.0352395	0.999992	-0.133446	0.999639	-0.0338069	0.883524	-0.239045	0.336617	-0.184646	0.797949
Adam10	-0.0177402	0.999992	0.0935513	0.999639	0.125529	0.468479	0.22455	0.39373	-0.0860282	0.941264
Adam11	-0.0707947		0.0213541	0.999639	-2.20564	0.00187403	-1.80657	0.0213531	0.318721	0.822792
Adam12	-0.0195751	0.999992	0.0458602	0.999639	-0.59461	0.0513939	-0.547731	0.0711568	-0.08811	0.942433
Adam15	-0.0128152	0.999992	0.0547971	0.999639	-0.159586	0.776398	-0.0374237	0.953273	-0.0200302	0.987338
Adam17	-0.0710665	0.999992	-0.0902464	0.999639	-0.22453	0.121504	-0.363258	0.00810636	-0.333006	0.519657
Adam18	0.00830743								-0.549965
Adam19	0.099979	0.999992	0.0430438	0.999639	-0.114012	0.492351	-0.0820318	0.772072	-0.889165	0.217037
Adam1a	0.0467644	0.999992	-0.0224401	0.999639	-0.774922	0.0460344	-0.853289	0.0523287	0.43327	0.697887
Adam1b	0.00518206		-0.0222069	0.999639	0.225388		-0.0557434		-0.521071
Adam2			-0.0104119	0.999639	0.214265				-0.184548
Adam20									-0.159387
Adam21	0.00897709		0.0165541	0.999639	-0.0623773	0.947986	0.0443374	0.964351	-0.283073
Adam22	-0.0835259	0.999992	0.0386846	0.999639	-1.53765	1.24458e-08	-1.49773	4.30718e-08	-0.00465533	0.996767
Adam23	0.00399505	0.999992	-0.0531973	0.999639	-2.29144	2.51034e-05	-2.67661	5.87824e-06	-1.09602	0.190768
Adam24									-0.0807744
Adam25									-0.211557
Adam26a									-0.279809
Adam26b									-0.14645
Adam28	-0.048052	0.999992	0.0971946	0.999639	-1.73422	0.000135065	-1.43394	0.00260582	-0.189807	0.889659
Adam29
Adam3	0.0131278		-0.0341146	0.999639	1.0333	0.207203	0.820326		-0.228559
Adam30	0.042609		-0.00901154	0.999639	-0.047209		-0.208456		-0.676004
Adam32	-0.035306		-0.0222997	0.999639	-0.679875	0.435725	-1.05068		-0.835784
Adam33	0.0182412		0.0236594	0.999639	-0.419105		-0.190539		0.665498
Adam34			0.0139419	0.999639			0.250342		-0.0848926
Adam39			0.0139419	0.999639			0.250342		-0.159387
Adam4	0.140867	0.999992	-0.127851	0.999639	-0.113052	0.730591	-0.415119	0.340338	-0.116152	0.937675
Adam5	-0.00222397		0.0183085	0.999639	-0.318149		0.091591		-0.298607
Adam6a	0.0114232		0.00885547	0.999639	-0.920852	0.273479	-0.87732		-0.31303
Adam6b	0.030143	0.999992	0.123006	0.999639	-1.70007	0.000701316	-1.30645	0.00525144	-1.23793	0.11769
Adam7									-0.57295
Adam8	-0.00235	0.999992	-0.0689192	0.999639	-0.507051	0.376387	-0.798733	0.160201	-0.259917	0.80078
Adam9	-0.0136748	0.999992	-0.0883089	0.999639	-0.644375	0.000863486	-0.802195	0.000979514	-0.121495	0.894052
Adamdec1	-0.100103	0.999992	-0.0373562	0.999639	-2.69926	8.02937e-07	-2.9404	9.06706e-07	-0.315937
Adamts1	0.0117285		0.0435319	0.999639	0.445315		1.08753		0.102662
Adamts10	-0.0288315	0.999992	-0.087317	0.999639	-0.765671	3.4857e-05	-0.920732	0.000661494	0.256157	0.80014
Adamts12	0.00741789		0.046548	0.999639			0.727414		-0.464056
Adamts13	0.0403216	0.999992	-0.0143814	0.999639	-0.914309	5.43113e-05	-0.965057	0.000201743	-0.0678906	0.951762
Adamts14	-0.107013	0.999992	0.123757	0.999639	0.674617	0.0939802	0.915747	0.0081464	-0.0378375	0.978701
Adamts15	0.00740223		-0.00954455	0.999639	-0.650992	0.456413	-0.954246		-0.57487
Adamts16	-0.00667758		-0.0112071	0.999639	-0.220275		-0.461162		-0.511333
Adamts17	-0.02093		-0.00149061	0.999639	-0.238405	0.786598	-0.292726	0.737627	-0.368579
Adamts18	-0.0216373		-0.0228775	0.999639	-0.648619	0.423864	-0.879188	0.281906	-0.754572
Adamts19			0.00474859	0.999639	0.277251		0.308003		-0.21614
Adamts2	0.0263432		-0.021116	0.999639	0.328114				-0.248378
Adamts20			-0.0029386	0.999639	0.550717		0.583833		-0.0331113
Adamts3	0.0239373		0.0338142	0.999639	0.435384		0.798771		-0.0764051
Adamts4	0.0225397		-0.0156179	0.999639	0.289223				0.191453
Adamts5	0.0498438		-0.00957346	0.999639	0.190963	0.842494	0.106857		0.0041575
Adamts6	0.102146	0.999992	0.126332	0.999639	-1.09412	1.77911e-07	-0.910735	0.000176466	-0.441143	0.664463
Adamts7	-0.00475212		-0.0147873	0.999639	0.0294615		-0.104146		-0.000573654
Adamts8	-0.0167891		0.119324	0.999639	-0.894097	0.239361	-0.233629	0.768793	-0.127381
Adamts9	0.0229836		-0.0760713	0.999639	0.768247		-0.250805		0.217738
Adamtsl1	-0.000148019		0.00819885	0.999639	-0.0182905		0.104006		-0.607099
Adamtsl2	0.00605406		-0.00826724	0.999639	0.00559128	0.995787	-0.0923734		0.274735
Adamtsl3	-0.00121867		0.0179473	0.999639	-0.318149		0.0531246		0.0259448
Adamtsl4	0.0806367	0.999992	0.101283	0.999639	-1.33774	0.000350718	-1.13049	0.0151876	-0.0887811	0.946788
Adamtsl5	0.0138638		0.0235162	0.999639	0.236952		0.518934		-0.21956
Adap1	0.0147169	0.999992	-0.0228195	0.999639	0.131507	0.565537	0.0696343	0.808915	-0.0560465	0.956461
Adap2	-0.0115979	0.999992	0.0201337	0.999639	-1.83544	3.7859e-05	-1.7307	0.00110432	0.0066479	0.995879
Adar	0.097815	0.999992	-0.0175467	0.999639	-0.46143	9.29341e-05	-0.513528	0.0240139	0.0736383	0.936856
Adarb1	-0.0518699	0.999992	-0.235609	0.999639	1.94411	2.38014e-15	1.60404	1.33144e-09	0.683671	0.454861
Adarb2	-0.0433633	0.999992	0.0676798	0.999639	0.670306	0.0666592	0.746842	0.0293764	0.116959	0.896733
Adat1	0.0157015	0.999992	-0.141882	0.999639	0.0513237	0.847557	-0.195662	0.56947	0.280832	0.761562
Adat2	0.0427622	0.999992	-0.13533	0.999639	0.398144	0.381429	0.0402456	0.947037	-0.444342	0.624474
Adat3	-0.0943499	0.999992	-0.0354622	0.999639	-0.161135	0.594575	-0.250821	0.438193	0.160397	0.886546
Adck1	0.080015	0.999992	-0.158128	0.999639	0.112104	0.691669	-0.152064	0.637591	0.291611	0.758607
Adck2	-0.00818709	0.999992	0.109639	0.999639	-0.996321	1.36582e-06	-0.861577	0.000482824	-0.192454	0.780061
Adck3	0.00683562	0.999992	-0.0718283	0.999639	-1.31584	1.0233e-17	-1.44244	2.62477e-09	-0.136331	0.894052
Adck4	-0.0411184	0.999992	0.065552	0.999639	-0.555912	0.00799137	-0.499786	0.0189599	0.213011	0.739373
Adck5	0.183404	0.999992	0.0112087	0.999639	-0.180772	0.563593	-0.178732	0.717451	0.305873	0.705195
Adcy1	-0.00848143		0.0443207	0.999639	-0.544139		-0.21311		-0.253917
Adcy10	0.0484251		0.079089	0.999639	-0.378823		0.510274		-0.182104
Adcy2	-0.00813177		0.0142027	0.999639	-0.287126		-0.0669048		-0.193941
Adcy3	0.180841	0.999992	0.0512485	0.999639	-0.100039	0.673139	-0.0453104	0.918718	0.351641	0.705195
Adcy4	0.0151066		0.00597251	0.999639	-0.34278	0.698234	-0.344059	0.702649	-0.491877
Adcy5	0.00114541		0.0301483	0.999639	-0.756631	0.278725	-0.625404	0.386791	0.121555
Adcy6	-0.0190943	0.999992	0.17767	0.999639	-0.605614	0.408356	0.425034	0.594748	1.04578	0.247057
Adcy7	0.0739354	0.999992	0.0870729	0.999639	-0.907654	9.00175e-12	-0.814664	8.69055e-05	-0.253247	0.759912
Adcy8	0.0171366		-0.0232536	0.999639	-0.368114		-0.785225		0.570671
Adcy9	0.157303	0.999992	0.00291204	0.999639	-0.242354	0.517104	-0.273811	0.455456	0.174386	0.906411
Adcyap1									-0.159387
Adcyap1r1	0.0260522		0.0147968	0.999639	-0.330184	0.709232	-0.243681	0.794274	-0.0109452
Add1	-0.0253842	0.999992	-0.021997	0.999639	-0.334847	0.00122085	-0.392545	0.00167873	-0.130068	0.785084
Add2	0.0306257		0.155962	0.999639	1.23239	0.109848	2.05608	0.00415024	-0.256593
Add3	0.0421142	0.999992	0.0236231	0.999639	-0.776386	1.35599e-17	-0.779357	3.34601e-07	-0.268178	0.575524
Adh1	0.00643735		0.00085654	0.999639	-0.0323932		-0.0268615		0.0145384
Adh4									-0.0807744
Adh5	-0.0154038	0.999992	0.0123166	0.999639	1.28761	3.65024e-16	1.24324	2.79851e-05	-0.166549	0.812507
Adh6-ps1	0.0583442		0.177929	0.999639	-0.0439365		1.16096	0.152251	-0.47073
Adh6a									-0.188595
Adh7	0.0078276								-0.163885
Adhfe1	0.116544		0.121929	0.999639	-0.668085	0.378413	-0.128797	0.872245	0.229779
Adi1	-0.0659305	0.999992	0.0585394	0.999639	0.862724	5.95756e-05	0.903419	0.000410819	-0.0786322	0.925398
Adig	0.0273126		-0.0104119	0.999639	-0.691378		-0.935771		-0.0137882
Adipoq	-0.00797549		-0.0146971	0.999639	0.0859594		-0.250805		0.0166954
Adipor1	-0.123284	0.999992	-0.075392	0.999639	0.0636441	0.701821	-0.0518581	0.786698	0.130507	0.789675
Adipor2	-0.0165813	0.999992	-0.0775705	0.999639	0.462381	0.000104627	0.341879	0.0141149	-0.393341	0.250555
Adk	0.0641035	0.999992	0.0126516	0.999639	2.16237	8.26032e-23	2.1219	2.74116e-14	-0.374372	0.630146
Adm	-0.0386743	0.999992	-0.0600152	0.999639	0.436643	0.410179	0.15397	0.836063	-0.106026
Adm2									-0.102625
Adnp	0.0275681	0.999992	0.0184723	0.999639	0.144262	0.278622	0.134058	0.357728	-0.0168097	0.979094
Adnp2	0.140413	0.999992	0.02514	0.999639	0.215408	0.266284	0.207378	0.369991	0.150418	0.842035
Ado	-0.0389036	0.999992	-0.0145631	0.999639	0.743592	1.15725e-06	0.694527	0.00164072	0.0693525	0.937675
Adora1	0.00830743		-0.0104119	0.999639	0.214265				0.0504492
Adora2a	-0.106302	0.999992	0.245978	0.999639	-1.04738	0.00102882	-0.454888	0.296534	-1.07449	0.202138
Adora2b	0.044277		0.101969	0.999639	-1.04269	0.207643	-0.296096	0.738486	-0.521104	0.677117
Adora3	0.0131344	0.999992	0.0565947	0.999639	-1.73593	0.00810147	-0.95132	0.24755	-0.780246
Adpgk	0.00125755	0.999992	0.0943294	0.999639	-0.0793084	0.629215	-0.00344613	0.987436	0.00551886	0.992802
Adprh	-0.0356396	0.999992	-0.112211	0.999639	0.356677	0.0574835	0.182442	0.394724	-0.0707587	0.91147
Adprhl1	0.00389372		-0.0310812	0.999639	-0.0662339		-0.633099		-0.172289
Adprhl2	0.0298711	0.999992	-0.0159543	0.999639	0.457425	0.00711394	0.406605	0.038384	-0.00534018	0.993835
Adprm	-0.0317041	0.999992	-0.113221	0.999639	-0.0266421	0.936328	-0.241462	0.384656	0.0348423	0.968686
Adra1a	0.0811421		0.249675	0.999639	-0.828623	0.305358	0.420822	0.559731	-0.856389	0.39241
Adra1b	-0.00717744		0.0891296	0.999639	-0.508333	0.565686	0.094563	0.917744	-0.477065
Adra1d									-0.217528
Adra2a	0.0163813		0.00595149	0.999639	0.175543		0.257418		0.224104
Adra2b	-0.0327744		0.00281071	0.999639	-0.433361		-0.478526		-0.466695
Adra2c	0.00730539		0.0579496	0.999639	0.0845242		0.678618		0.223024	0.826673
Adrb1	0.0163967	0.999992	-0.0284164	0.999639	-1.54763	0.0168168	-1.66229	0.0224518	-0.660218
Adrb2	0.0178963	0.999992	0.201532	0.999639	-1.97525	9.3655e-40	-1.50692	3.58434e-05	0.166754	0.874857
Adrb3	0.00994505		0.0240211	0.999639			0.404275		-0.0145254
Adrbk1	0.0901611	0.999992	0.0577067	0.999639	0.0799878	0.523639	0.115172	0.582704	0.26858	0.591944
Adrbk2	-0.0196051	0.999992	0.0106549	0.999639	-1.67371	3.15289e-11	-1.68498	3.8385e-11	-0.928827	0.332808
Adrm1	-0.0628104	0.999992	-0.121264	0.999639	0.690103	5.11152e-05	0.511382	0.00987042	0.16947	0.779267
Adsl	-0.0344848	0.999992	-0.107773	0.999639	0.979625	5.71527e-09	0.814036	7.80599e-06	0.171756	0.701216
Adss	0.0610686	0.999992	0.0873968	0.999639	0.991856	1.06506e-11	1.06562	1.50275e-05	-0.132447	0.874857
Adssl1	-0.0156023	0.999992	0.212488	0.999639	0.561128	0.183039	0.90703	0.025755	0.302336	0.787121
Adtrp	0.0374939		0.151594	0.999639	-0.653306	0.43913	0.271701	0.747206	-0.181921
Aebp1	0.0222227		-0.202528	0.999639	1.09851	0.0546354	0.462194	0.492902	0.290616	0.819948
Aebp2	0.047579	0.999992	0.0973316	0.999639	0.297513	0.0485087	0.386499	0.026611	0.0697867	0.86959
Aen	-0.00832684	0.999992	-0.170369	0.999639	0.798687	2.15406e-08	0.568221	0.000569029	0.230659	0.746848
Aes	-0.123305	0.999992	-0.0844746	0.999639	0.131686	0.484214	-0.00294898	0.990135	-0.157787	0.842149
AF067063	-0.000515292		0.0130379	0.999639	-0.28926		-0.0482884		-0.243696
AF251705	-0.0386165	0.999992	-0.0481415	0.999639	-1.35763	0.0068683	-1.47896	0.0225948	-0.575518
AF357355			0.0360427	0.999639			0.591064		-0.159387
AF357359
AF357399	0.0497413		-0.0234647	0.999639	1.20864	0.0669347	1.12117	0.10915	-0.0260286	0.982188
AF366264	-0.000462107	0.999992	0.107753	0.999639	-1.58972	0.000500012	-1.16751	0.0157475	-0.542161	0.659139
AF529169	0.00741789								-0.102625
Afap1	-0.124944	0.999992	0.237924	0.999639	-0.181591	0.653555	0.282626	0.450693	-0.0390708	0.978701
Afap1l1	-0.0320437		0.000795729	0.999639	-0.280457	0.76443	-0.30324		0.0343725
Afap1l2	0.0413773		0.175908	0.999639	-0.0992625		1.18787	0.148724	-0.160182
Aff1	0.0629772	0.999992	0.0570502	0.999639	0.39043	7.53941e-05	0.421968	0.00966034	0.415129	0.437259
Aff2	-0.0164545	0.999992	-0.0287681	0.999639	-0.5195	0.403795	-0.672816	0.265817	-0.158478	0.919127
Aff3	0.0918932	0.999992	0.0133805	0.999639	-0.142376	0.245651	-0.160983	0.430496	0.206075	0.75603
Aff4	-0.0159612	0.999992	0.0455207	0.999639	-1.05146	5.26188e-27	-1.01233	8.32583e-07	-0.0373818	0.955859
Afg3l1	0.0900448	0.999992	-0.103644	0.999639	0.312501	0.0854779	0.148851	0.523547	-0.0649765	0.927461
Afg3l2	0.0322979	0.999992	0.0412629	0.999639	0.315696	0.0882254	0.343072	0.284542	0.349516	0.378951
Afm	-0.00162207		0.0139419	0.999639	-0.318149		-0.0691041		-0.225238
Afmid	0.028126	0.999992	-0.0138426	0.999639	-1.46439	4.50278e-11	-1.49979	1.72097e-07	-0.216329	0.828779
Afp	-0.0341877		-0.0659529	0.999639	-0.990316	0.155188	-1.62415	0.0228042	-0.110759
Aftph	0.0350593	0.999992	0.0121721	0.999639	-0.22938	0.0534726	-0.245642	0.14878	-0.0120508	0.978495
Aga	0.0271212	0.999992	0.0398973	0.999639	-0.542321	0.185327	-0.494479	0.210242	-0.210465	0.858459
Agap1	-0.0142866	0.999992	-0.0206187	0.999639	-0.763741	0.0400941	-0.806857	0.109348	0.454612	0.677113
Agap2	-0.0236533	0.999992	0.0112718	0.999639	-0.963396	1.24285e-11	-0.974989	8.97746e-06	0.16406	0.879565
Agap3	-0.00635456	0.999992	-0.127047	0.999639	0.707858	6.02887e-05	0.51194	0.03381	0.587858	0.214228
Agbl1	0.116385	0.999992	0.305282	0.999639	0.0677849	0.883471	0.605702	0.185858	-0.197422	0.888528
Agbl2	-0.000148019		0.013595	0.999639	0.463052		0.556816		0.222255
Agbl3	0.0344764	0.999992	0.0855718	0.999639	-0.930551	0.00222347	-0.805598	0.00642472	-0.321389	0.729486
Agbl4	-0.000148019				-0.280203		-0.250805		-0.102625
Agbl5	0.0977143	0.999992	-0.0457558	0.999639	-0.108607	0.613053	-0.208837	0.491873	0.0364386	0.961928
Ager	-0.101447	0.999992	0.0283833	0.999639	-0.996079	0.0128481	-0.931504	0.0305509	0.208334	0.873315
Agfg1	0.0726597	0.999992	0.0626594	0.999639	-0.0515949	0.795769	-0.000996563	0.997549	0.272497	0.518822
Agfg2	0.0129788	0.999992	-0.0598247	0.999639	0.904501	1.62487e-06	0.801178	8.15458e-05	0.233319	0.761042
Aggf1	0.0244045	0.999992	-0.102117	0.999639	0.171144	0.245366	0.00885557	0.97369	0.207411	0.687744
Agk	-0.0371039	0.999992	-0.115752	0.999639	0.696032	0.00010762	0.501845	0.0516392	0.112845	0.898578
Agl	-0.0877425	0.999992	0.11373	0.999639	-0.925993	1.00643e-05	-0.768422	0.000274364	-0.704167	0.260728
Agmat	0.00938609		0.00283589	0.999639	-0.0401236		-0.0308087		-0.136943
Agmo	-0.0229005		0.0171479	0.999639	-0.833771	0.320082	-0.620458	0.498059	-0.0538862
Ago1	-0.0289817	0.999992	-0.0242566	0.999639	-0.339064	0.0139031	-0.399456	0.0718783	0.189289	0.646545
Ago2	-0.0725298	0.999992	-0.0853814	0.999639	-0.276329	0.0777673	-0.414048	0.0227493	0.259656	0.646422
Ago3	0.0469659	0.999992	-0.105343	0.999639	-0.563149	0.00221182	-0.730352	0.000711898	0.00359382	0.995857
Ago4	-0.157189	0.999992	0.0256133	0.999639	-1.23505	7.93662e-10	-1.21202	8.11429e-06	-0.224966	0.823158
Agpat1	-0.03973	0.999992	-0.0137431	0.999639	-0.0194851	0.925893	-0.0689882	0.751742	-0.0669251	0.943796
Agpat2	-0.0102969	0.999992	0.0797021	0.999639	-0.659488	0.13494	-0.524776	0.22371	0.407136	0.682494
Agpat3	-0.162999	0.999992	0.0864018	0.999639	-0.699453	4.97583e-07	-0.619968	0.00251747	-0.111178	0.827656
Agpat4	-0.107964	0.999992	0.0150071	0.999639	-0.445443	0.11241	-0.459701	0.126352	-0.00629137	0.995857
Agpat5	0.0338624	0.999992	-0.15034	0.999639	1.86912	3.29342e-24	1.64887	2.29841e-15	-0.225549	0.759202
Agpat6	0.0698064	0.999992	-0.116587	0.999639	0.319063	0.0513393	0.135987	0.580895	-0.00387606	0.994318
Agpat9	0.036453	0.999992	0.178631	0.999639	0.409509	0.115134	0.644453	0.0039016	0.0878407	0.957923
Agps	0.044917	0.999992	0.0356014	0.999639	0.565185	1.35112e-05	0.5714	0.0196497	-0.371893	0.453904
Agr2	0.0447271		0.0132841	0.999639	0.214265		0.308003		-0.375458
Agr3	0.0078276								-0.186195
Agrn	0.0713565	0.999992	0.114869	0.999639	-0.622469	0.0522332	-0.467482	0.182073	0.905414	0.308503
Agrp	0.0864587	0.999992	-0.00822961	0.999639	-0.502878	0.100291	-0.556919	0.145167	0.67063	0.357601
Agt	-0.00800606		-0.0112071	0.999639	-0.489998		-0.850724		0.462933
Agtpbp1	0.0424623	0.999992	-0.0458776	0.999639	-0.541797	0.000265177	-0.633976	0.00398563	0.159302	0.813121
Agtr1a	0.00213656		-0.0225967	0.999639	0.280861		-0.250805		-0.183964
Agtr1b									-0.143404
Agtr2									-0.186195
Agtrap	-0.0419292	0.999992	-0.110886	0.999639	-0.336936	0.161957	-0.5246	0.0271886	-0.145285	0.901062
Agxt									-0.159387
Agxt2	0.0117285		0.0139419	0.999639			0.250342		-0.229695
Ahctf1	0.0103302	0.999992	-0.0195644	0.999639	0.116728	0.329699	0.0640545	0.729396	-0.0714035	0.920676
Ahcy	-0.0217143	0.999992	0.0502473	0.999639	1.95206	4.21676e-30	1.94265	4.53155e-11	0.155247	0.837314
Ahcyl1	-0.0973553	0.999992	0.0621761	0.999639	0.359113	0.0181445	0.412021	0.0687022	-0.020312	0.974023
Ahcyl2	0.0328452	0.999992	-0.0798185	0.999639	-1.15561	1.317e-11	-1.29629	1.79068e-11	0.152782	0.864546
Ahdc1	0.0641484	0.999992	-0.0284392	0.999639	-0.229039	0.315815	-0.304291	0.354862	0.683195	0.282685
Ahi1	0.0896555	0.999992	-0.143387	0.999639	0.385111	0.118967	0.139018	0.676337	-0.00629408	0.994794
Ahnak	-0.0528659	0.999992	0.23479	0.999639	0.697094	1.38616e-09	0.943445	1.45513e-10	-0.505293	0.518422
Ahr	-0.0751271	0.999992	-0.110797	0.999639	-1.45392	1.29666e-05	-1.74	5.82283e-06	-0.0210441	0.987338
Ahrr	0.102483	0.999992	0.0600482	0.999639	-0.452984	0.422266	-0.324818	0.569292	-0.329564	0.76922
Ahsa1	-0.197281	0.999992	-0.142319	0.999639	1.25243	7.45821e-16	1.00888	1.50488e-05	0.150597	0.819455
Ahsa2	-0.152467	0.999992	-0.265598	0.999639	-0.389398	0.279547	-0.946834	0.00359023	-0.134138	0.86242
Ahsg									-0.186195
AI118078	-0.00397167		0.0162787	0.999639	-0.0814563		0.119155		-0.627789
AI182371	0.0675682		0.0164432	0.999639	-0.466293	0.592409	-0.407994	0.645279	-0.723988
AI314180	0.0783269	0.999992	0.0111828	0.999639	0.606371	1.35483e-08	0.584704	5.46311e-05	0.223369	0.742365
AI317395	-0.00926071		-0.0508994	0.999639	0.64366		0.0884007		0.0594663
AI413582	0.131745	0.999992	0.0102801	0.999639	0.197601	0.461905	0.179172	0.519146	-0.29692	0.631608
AI414108	0.0189973		0.0360961	0.999639	-1.13267		-0.484181		-0.341302
AI427809	-0.0146772		0.139197	0.999639	1.60445	0.0073629	2.03485	0.00119559	-1.25282	0.099242
AI429214	0.0236866		0.0471239	0.999639	-0.0611104	0.942854	0.120143	0.886305	0.0649641
AI450353	0.029797	0.999992	-0.102103	0.999639	0.794805	0.0629603	0.584333	0.246192	-0.136383	0.919388
AI464131	-0.0327931		-0.0075356	0.999639	-1.13996	0.140398	-1.23925	0.119349	1.16765
AI467606	-0.135466	0.999992	0.0875374	0.999639	-0.0292866	0.894146	0.0526335	0.77479	-0.375492	0.451098
AI504432	0.0854176	0.999992	0.166006	0.999639	-0.569511	0.000618842	-0.298974	0.386288	-0.217011	0.853529
AI506816	0.21569	0.999992	0.043606	0.999639	0.963001	6.308e-08	0.97656	0.000236	-0.0871386	0.945376
AI507597									-0.165634
AI593442			0.0109668	0.999639	0.236952		0.308003		-0.273494
AI597479	-0.110558	0.999992	-0.144581	0.999639	0.353003	0.0734531	0.118428	0.684572	-0.0787987	0.938107
AI661453	-0.00797549		0.0677978	0.999639	-0.280203		0.838419		-0.507314
AI662270	0.00615183	0.999992	0.026394	0.999639	0.863165	6.68737e-09	0.848434	0.00568757	-0.28536	0.527914
AI837181	-0.105372	0.999992	-0.123989	0.999639	0.0224809	0.927447	-0.172192	0.411571	-0.0318997	0.966055
AI846148	0.113498	0.999992	0.128593	0.999639	-0.219946	0.343974	-0.0645641	0.845939	0.698291	0.194271
AI854703	0.0514385		0.182316	0.999639	1.64311	0.0100372	2.18505	0.000184226	0.231346	0.879565
AI987944	0.0414105	0.999992	0.012208	0.999639	-0.108257	0.625267	-0.109044	0.74132	-0.494603	0.360978
Aicda	0.0525363	0.999992	0.249584	0.999639	-3.23641	3.09464e-15	-2.38479	1.41356e-09	0.16942
Aida	0.0618231	0.999992	0.0542079	0.999639	-0.0425103	0.806464	-0.00611443	0.981813	-0.500164	0.242135
Aif1	0.0933948	0.999992	-0.00988214	0.999639	-0.760763	0.104727	-0.792144	0.170339	-0.297137	0.834747
Aif1l	0.0398178		-0.0192222	0.999639	0.28478	0.760385	0.127046		-0.00466513
Aifm1	-0.0541164	0.999992	-0.000189967	0.999639	0.593735	0.00441006	0.557987	0.017098	0.0243943	0.978701
Aifm2	-0.0175892		0.0899288	0.999639	-0.885017	0.177944	-0.534403	0.39928	-0.0726881	0.961928
Aifm3	0.0162244		0.0600133	0.999639	-0.359506		0.233425		-0.440146
Aig1	0.0583257	0.999992	0.0633293	0.999639	-1.30474	1.49133e-09	-1.22884	1.37973e-06	-0.489003	0.579101
Aim1	0.0136319	0.999992	0.226318	0.999639	-1.21917	1.14493e-20	-0.940308	8.20249e-06	-0.0855186	0.941675
Aim1l	-0.0523547	0.999992	-0.00870359	0.999639	-0.938237	0.00119448	-0.985398	0.00130566	-0.123523	0.909005
Aim2	0.0716626	0.999992	0.0685483	0.999639	-0.914078	2.00361e-09	-0.860798	1.46898e-07	-0.818492	0.280086
Aimp1	-0.203851	0.999992	-0.00358654	0.999639	1.08144	2.57199e-07	1.03673	4.23918e-05	-0.124526	0.871927
Aimp2	-0.0292459	0.999992	-0.18491	0.999639	1.53177	7.48522e-12	1.25512	2.46838e-08	0.159975	0.829181
Aip	-0.00383134	0.999992	0.00948371	0.999639	0.0990164	0.693217	0.0795113	0.848604	0.633402	0.062952
Aipl1	-0.00822279		-0.00207112	0.999639	0.750416		0.831923		-0.0623353
Aire	-0.0779201		-0.00113986	0.999639	-2.63484	0.000387111	-2.6786	0.000506237	0.221426
Airn	0.0254423	0.999992	0.153352	0.999639	0.663472	0.135906	0.960794	0.0489521	0.779392	0.33267
Ajap1	0.00632683		0.0262971	0.999639	-0.280203		0.198825		-0.201082
Ajuba	0.0441098		0.0983629	0.999639	0.244532	0.786428	0.716226	0.384457	0.450818
AK010878	-0.122091	0.999992	0.0652745	0.999639	0.499443	0.0673935	0.56903	0.0638174	0.222825	0.780593
Ak1	0.00915052		-0.00113162	0.999639	0.000112589		-0.0446913		0.132996
AK129341	0.0024326		0.127071	0.999639	0.0988661		1.23107		0.0319299
Ak2	0.11335	0.999992	-0.122568	0.999639	1.26702	6.49011e-20	1.08836	1.2069e-13	0.1766	0.803772
Ak3	-0.0602681	0.999992	0.103591	0.999639	0.875568	1.79783e-11	0.966637	1.64664e-07	-0.10555	0.885023
Ak4	0.00643735		-0.014196	0.999639	1.52559	0.0577489	1.32246		-0.576749	0.63013
Ak5	-0.00208262	0.999992	0.140153	0.999639	-0.868063	0.179574	-0.373907	0.546055	-0.326785
Ak7	0.0341904		0.111343	0.999639	0.838107	0.301276	1.4516	0.0547566	0.365943
Ak8	0.0355789		0.0160373	0.999639	-0.726412	0.318412	-0.676967	0.358537	-1.96364	0.00157647
Akap1	0.272359	0.999992	0.0544093	0.999639	4.09265	8.77962e-48	4.10748	6.43896e-42	0.414162	0.282685
Akap10	0.0373502	0.999992	0.131472	0.999639	-0.429593	0.00438755	-0.304522	0.0613285	-0.0477047	0.943065
Akap11	0.0694743	0.999992	0.0104377	0.999639	0.0047092	0.979145	-0.0116033	0.962305	-0.121773	0.838501
Akap12	0.0547749	0.999992	-0.0798307	0.999639	2.67174	7.93053e-110	2.53348	2.0901e-61	0.636344	0.5792
Akap13	0.058919	0.999992	0.0308929	0.999639	-0.833754	6.35284e-17	-0.80667	0.000989608	0.0889073	0.91952
Akap14	0.032953		0.144844	0.999639	-0.77983	0.340811	0.12135	0.881186	0.105664
Akap17b	0.0584281	0.999992	0.13501	0.999639	1.13522	2.06127e-08	1.27788	1.00308e-09	-0.449988	0.558891
Akap2	0.144589	0.999992	-0.0271352	0.999639	-0.680288	0.000175188	-0.744424	0.00889315	-0.179734	0.854461
Akap3	0.0201434		0.0135707	0.999639			0.24385		-0.182811
Akap4									-0.156755
Akap5	0.247204	0.999992	-0.0224461	0.999639	-1.41487	2.27399e-07	-1.48376	7.68484e-07	0.460432	0.646545
Akap6	-0.0284831		0.0262971	0.999639	-2.08869	0.00692824	-1.56262		-0.368868
Akap7	0.0422091	0.999992	0.0841093	0.999639	-0.63702	0.0311377	-0.518229	0.101815	0.0221165	0.985707
Akap8	0.0478412	0.999992	-0.071549	0.999639	-0.315596	0.00784172	-0.427326	0.00114528	0.245517	0.598638
Akap8l	0.0884791	0.999992	0.0295662	0.999639	-1.0941	3.78145e-12	-1.05532	0.000205113	0.198769	0.828503
Akap9	0.0486278	0.999992	0.0242098	0.999639	-0.571456	5.02306e-06	-0.561401	0.0278822	0.166933	0.837314
Akip1	-0.0133519	0.999992	0.132324	0.999639	1.06381	0.00780373	1.28489	0.00245318	0.235915	0.81711
Akirin1	0.00321076	0.999992	0.0551653	0.999639	0.201747	0.191903	0.243595	0.346053	-0.162318	0.816077
Akirin2	0.19198	0.999992	0.0140659	0.999639	0.373688	0.0620197	0.363461	0.0699168	0.131044	0.862742
Akna	0.033611	0.999992	-0.0842517	0.999639	-0.458515	0.00213762	-0.612176	0.0190447	0.379627	0.633674
Aknad1	0.028672		0.00602195	0.999639	-0.799912	0.313229	-0.834838	0.28617	-0.186743
Akp3			0.0179473	0.999639			0.331664
Akr1a1	-0.0121437	0.999992	0.0640906	0.999639	0.706355	1.51214e-05	0.750904	0.00540465	-0.115191	0.820347
Akr1b10	-0.0224202	0.999992	0.0332384	0.999639	-0.847269	0.00218625	-0.814728	0.0148553	-0.246211	0.822792
Akr1b3	-0.00926071				-0.318149		-0.293793
Akr1b7	0.0120342		0.109918	0.999639	-0.548864		0.416916	0.653571	-0.0807744
Akr1b8	-0.00780758		-0.00672778	0.999639	-0.133109		-0.238172		0.0414568
Akr1c12	-0.000148019				-0.280203		-0.250805		0.111896
Akr1c13	-0.00136193		0.00837	0.999639	-0.338479	0.712751	-0.317562		-0.316316
Akr1c14	-0.00926071		0.0163751	0.999639	-0.318149		0.0330577		-0.390299
Akr1c18									-0.153822
Akr1c19
Akr1c20	0.022552		0.0191036	0.999639	0.123392		0.385873		-0.166969
Akr1c21			-0.00953618	0.999639	0.328114		0.24385		0.106276
Akr1c6									-0.102625
Akr1cl	0.00175677		-0.00726429	0.999639	0.29683		0.149815		-0.125728
Akr1d1	0.0236648		0.0135906	0.999639	-0.316706		-0.153923		0.0693855
Akr1e1	0.071536	0.999992	0.202646	0.999639	0.931409	0.0330702	1.35645	0.00116754	-0.125301	0.941423
Akr7a5	-0.0614739	0.999992	-0.00825367	0.999639	0.393563	0.115971	0.338695	0.295991	0.317854	0.705195
Akt1	-0.0331659	0.999992	-0.0153818	0.999639	0.958616	1.52451e-13	0.906551	6.63885e-08	0.291206	0.533679
Akt1s1	0.0437895	0.999992	-0.0145211	0.999639	0.482773	0.0276452	0.4292	0.0970943	0.432872	0.332808
Akt2	-0.0623935	0.999992	0.0185122	0.999639	-0.001888	0.992304	-0.013086	0.952671	-0.0641709	0.910613
Akt3	0.0368116	0.999992	0.0871945	0.999639	-0.573858	0.000395799	-0.496545	0.0051142	-0.0367059	0.976801
Aktip	-0.132845	0.999992	-0.22674	0.999639	-0.422677	0.0857933	-0.79545	0.0018056	-0.312591	0.648806
Alad	-0.065742	0.999992	-0.113807	0.999639	0.753506	0.000385856	0.570839	0.0161543	0.1449	0.87288
Alas1	-0.0190098	0.999992	-0.00230586	0.999639	0.372839	0.113343	0.324298	0.250412	-0.0182487	0.981499
Alas2	-0.0537013	0.999992	0.220261	0.999639	-1.26728	0.000201872	-0.764631	0.033378	-0.0532271	0.96846
Alb	0.0853083	0.999992	-0.0344435	0.999639	-0.295261	0.620106	-0.424732	0.490438	0.242054	0.780264
Alcam	0.0348201	0.999992	0.0559229	0.999639	-3.75073	8.10619e-39	-3.57355	1.00135e-30	-0.67687	0.521045
Aldh16a1	0.0321858	0.999992	-0.0631826	0.999639	0.445725	0.00447458	0.343295	0.0841186	0.0781319	0.905918
Aldh18a1	-0.0214037	0.999992	-0.142818	0.999639	1.39092	1.28198e-19	1.17539	1.91571e-09	0.303662	0.445278
Aldh1a1	0.0365091		-0.00397346	0.999639	-0.306977	0.74075	-0.406097		-0.0926043
Aldh1a2	-0.0135697		0.0199065	0.999639	-0.0685803		0.186332		0.218846
Aldh1a3	0.0425662		0.0274197	0.999639	0.202074	0.833147	0.360168		-0.775454
Aldh1a7			-0.0156179	0.999639	0.289223				-0.216649
Aldh1b1	0.00768303	0.999992	0.151905	0.999639	0.427406	0.350994	0.728888	0.0505613	0.524563	0.656573
Aldh1l1	0.0404718		-0.0205861	0.999639	-0.575816	0.505104	-0.769356		0.0646812
Aldh1l2	-0.0081095	0.999992	-0.102199	0.999639	-1.0845	0.00379337	-1.35489	0.00143998	-1.08362	0.116637
Aldh2	-0.0121982	0.999992	0.128836	0.999639	0.772772	2.62781e-06	0.904982	1.81122e-08	0.165487	0.855757
Aldh3a1	-0.00462055		0.0135707	0.999639	-0.368793		-0.196981		-0.208416
Aldh3a2	-0.0791124	0.999992	0.123902	0.999639	-0.482781	0.00280858	-0.364587	0.0632697	0.105904	0.881403
Aldh3b1	-0.0557429	0.999992	0.00181899	0.999639	-0.0807169	0.760486	-0.121305	0.743164	-0.532735	0.272141
Aldh3b2	-0.00926071		0.0130379	0.999639	-0.318149		-0.10698		-0.151476
Aldh4a1	0.0953183	0.999992	-0.157941	0.999639	0.214922	0.422218	-0.0506418	0.880187	-0.099564	0.915435
Aldh5a1	0.0246929		0.129037	0.999639	0.283405	0.761559	1.17919	0.139121	-0.523838	0.677207
Aldh6a1	0.000286887	0.999992	-0.139225	0.999639	-0.584602	0.0570911	-0.868019	0.0049437	0.167659	0.85595
Aldh7a1	-0.0301216	0.999992	0.0359768	0.999639	-0.0107222	0.98481	0.0487608	0.926047	-0.945217	0.102618
Aldh8a1	0.0544792		0.0669271	0.999639	-0.244733		0.494647		-0.287704
Aldh9a1	-0.0574924	0.999992	-0.0853736	0.999639	1.19364	6.85241e-14	1.05402	1.05464e-07	0.1154	0.885023
Aldoa	-0.104401	0.999992	0.0364952	0.999639	0.36375	0.0475303	0.374087	0.0540446	0.16505	0.840498
Aldoart1	-0.00851142		-0.0176192	0.999639	0.396951		0.208453		-0.253667
Aldoart2	0.00830743								0.634929	0.581257
Aldob	-0.00885837		-0.0762318	0.999639	-0.00766482	0.994298	-0.739673		-0.138107
Aldoc	-0.0902524	0.999992	-0.0506295	0.999639	-0.523044	0.335828	-0.686426	0.260335	-0.388577	0.721522
Alg1	-0.0236383	0.999992	-0.0321144	0.999639	-0.330124	0.188353	-0.412818	0.156311	-0.278289	0.694505
Alg10b	0.0137281	0.999992	0.119916	0.999639	0.394251	0.0171348	0.544718	0.0640169	-0.181611	0.837314
Alg11	-0.12008	0.999992	0.0312821	0.999639	-0.03812	0.905456	-0.00993059	0.981835	-0.34187	0.698438
Alg12	-0.0475895	0.999992	-0.0819007	0.999639	-0.526577	0.012136	-0.681925	0.00838609	-0.201936	0.780712
Alg13	0.0674283	0.999992	0.195632	0.999639	0.161761	0.622368	0.432344	0.133053	-0.441101	0.364132
Alg14	-0.0480045	0.999992	0.0449881	0.999639	-0.34985	0.407268	-0.27833	0.531244	-0.42689	0.626214
Alg2	-0.0598287	0.999992	-0.0826909	0.999639	-0.367185	0.0631567	-0.519363	0.0509415	0.0425563	0.950539
Alg3	-0.0479772	0.999992	-0.0538704	0.999639	0.709467	0.010999	0.584103	0.0638174	-0.151684	0.847806
Alg5	0.0302569	0.999992	0.152235	0.999639	0.672036	0.0077888	0.8612	0.00186901	-0.578016	0.152862
Alg6	0.125873	0.999992	0.0498055	0.999639	0.496022	0.0731458	0.543578	0.0769139	-0.658155	0.322718
Alg8	0.0679183	0.999992	-0.16012	0.999639	1.3879	6.8077e-10	1.14341	4.36069e-05	-0.0914489	0.928439
Alg9	0.0561385	0.999992	-0.0408415	0.999639	0.0201873	0.940705	-0.0790251	0.823292	-0.0234802	0.979012
Alk	0.00741789		0.00784732	0.999639	0.502593		0.679384		-0.424481
Alkbh1	0.0082383	0.999992	-0.0996137	0.999639	0.38491	0.00996233	0.232165	0.175915	0.101883	0.909753
Alkbh2	-0.0238172	0.999992	-0.144518	0.999639	-0.0015777	0.996714	-0.293773	0.434499	0.59014	0.359695
Alkbh3	0.109647	0.999992	-0.0296961	0.999639	-0.124324	0.579188	-0.196208	0.359823	-0.152591	0.922086
Alkbh4	-0.0145514	0.999992	-0.0998634	0.999639	-0.0897475	0.737661	-0.267529	0.296013	-0.245877	0.735936
Alkbh5	0.0303594	0.999992	-0.0870137	0.999639	0.447872	4.32725e-05	0.318652	0.0060604	0.0444038	0.958795
Alkbh6	-0.0615802	0.999992	-0.0806934	0.999639	-0.168471	0.671515	-0.361752	0.281513	0.195372	0.79961
Alkbh7	-0.126804	0.999992	-0.0534765	0.999639	0.149004	0.722116	-0.0150448	0.978381	-0.00671458	0.994318
Alkbh8	0.0415929	0.999992	-0.117779	0.999639	0.48779	0.00930927	0.311002	0.142106	0.0417416	0.963611
Allc	0.00741789		0.0139419	0.999639			0.250342		-0.102625
Alms1	0.043213	0.999992	-0.0467409	0.999639	1.64473	7.28857e-34	1.52338	1.23797e-10	0.410616	0.470774
Alox12	0.0448378	0.999992	0.0362939	0.999639	0.0787849	0.903636	0.193458	0.779897	-0.363989	0.767545
Alox12b									-0.186195
Alox12e			0.0139419	0.999639			0.250342		-0.41067
Alox15	0.00263508		0.0611963	0.999639	-0.0547447		0.56402		-0.263213
Alox5	-0.0332363		0.0108215	0.999639	-0.500879	0.574936	-0.472738		-0.591509	0.620492
Alox5ap	-0.00604849		-0.013509	0.999639	0.225775	0.734108	0.138359	0.864627	-0.520802	0.666353
Alox8	0.0484409	0.999992	0.0670934	0.999639	-0.364566	0.471615	-0.226753	0.653926	0.0774081	0.951041
Aloxe3	0.00864317		0.0337609	0.999639	-0.493901		0.0416361		-0.230716
Alpi	-0.00162207				-0.318149		-0.293793		-0.186195
Alpk1	0.0372634	0.999992	0.122865	0.999639	-1.21255	0.00105193	-0.945811	0.0093829	-0.0209375	0.986182
Alpk2	-0.138934	0.999992	0.00613631	0.999639	-1.34989	3.75154e-07	-1.3557	4.17566e-05	-0.550246	0.605955
Alpk3	-0.03983		0.0182493	0.999639	-1.71187	0.0202571	-1.61145	0.0270636	-0.0239145
Alpl	-0.0344507	0.999992	-0.0300763	0.999639	3.34775	6.94755e-45	3.24069	8.45346e-31	0.713561	0.521727
Alppl2			0.0135707	0.999639			0.24385		-0.163885
Als2	-0.101038	0.999992	-0.0130393	0.999639	-1.2916	6.95863e-09	-1.34213	5.29408e-08	-0.920529	0.212764
Als2cl	-0.081274	0.999992	-0.0745041	0.999639	-2.28967	3.2506e-06	-2.70049	6.32274e-08	0.541922	0.657655
Als2cr11	-0.00797549		-0.0116625	0.999639	-0.00259576		-0.250805		-0.280876
Als2cr12	-0.0545373		0.077958	0.999639	-1.47996	0.0505113	-0.938665	0.193854	-0.53096
Alx1	-0.00222397		0.0139419	0.999639	-0.318149		-0.0691041		-0.102625
Alx3	0.00938951		0.0139419	0.999639			0.250342		-0.0212424
Alx4	0.0118901	0.999992	0.0687517	0.999639	-1.22459	0.0155175	-1.02023	0.0400998	-0.550621	0.616285
Alyref	0.0535921	0.999992	0.132229	0.999639	1.61518	4.08157e-15	1.75447	4.02837e-08	0.233759	0.57322
Alyref2	-0.0532161	0.999992	-0.0412217	0.999639	0.623704	0.0367902	0.530956	0.0713538	0.259275	0.786888
Amacr	0.0106278	0.999992	-0.0841253	0.999639	-0.189026	0.698551	-0.450395	0.306617	0.592508	0.585806
Ambn	0.00976927				-0.318149		-0.293793		-0.203568
Ambp									-0.0413603
Ambra1	0.0747494	0.999992	0.0300026	0.999639	-0.420377	0.00122137	-0.412319	0.0480427	0.365217	0.553988
Amd1	-0.0631494	0.999992	-0.0263324	0.999639	1.02094	1.43618e-15	0.936319	0.000737733	-0.174125	0.79961
Amdhd1	-0.00560165		-0.0851444	0.999639	2.06502	0.0056401	1.73005	0.0315465	0.750617
Amdhd2	0.0215248	0.999992	-0.058575	0.999639	-0.392198	0.0588275	-0.506907	0.0249799	0.257688	0.735936
Amelx	-0.00812598		0.00274037	0.999639	-1.22837	0.134147	-1.21661		-0.375458
Amer1	0.0419432	0.999992	-0.0638009	0.999639	0.0980391	0.59677	-0.013453	0.958428	0.596062	0.208977
Amer2	0.00715025		-0.0123094	0.999639	0.12208		-0.0514962		-0.430506
Amer3	0.0264205		0.00171422	0.999639	-0.448244		-0.458134		-0.0890416
Amfr	-0.0972729	0.999992	0.034269	0.999639	-0.545727	9.62874e-06	-0.539133	0.00185783	-0.38987	0.571267
Amh	-0.0507522	0.999992	-0.061541	0.999639	0.0243585	0.967766	-0.206652	0.748265	0.580558	0.548868
Amhr2	-0.0359157		-0.000512745	0.999639	-1.67343	0.0350074	-1.69491	0.0403922	-0.6517
Amica1	0.110033	0.999992	0.0350323	0.999639	-1.37368	0.0011349	-1.29094	0.00305177	-1.02127	0.267126
Amigo1	0.0248633	0.999992	-0.110288	0.999639	-0.061227	0.858282	-0.270681	0.435533	0.135827	0.929398
Amigo2	-0.000789032	0.999992	0.0489917	0.999639	-0.73936	0.00688799	-0.68825	0.0305341	1.18408	0.131531
Amigo3	0.0506509	0.999992	0.151474	0.999639	-0.860756	4.87883e-05	-0.652785	0.0217056	-0.222514	0.820347
Ammecr1	0.0712343	0.999992	0.0458838	0.999639	0.983326	5.95441e-08	1.00949	4.27608e-06	-0.068009	0.955884
Ammecr1l	-0.0342736	0.999992	-0.0117683	0.999639	-0.0311489	0.871099	-0.078917	0.750406	-0.0721427	0.925549
Amn	0.137005	0.999992	-0.00198762	0.999639	-1.46414	0.0382701	-1.53391	0.0309793	0.0776059
Amn1	-0.0867791	0.999992	0.153811	0.999639	-0.820397	0.0212617	-0.551934	0.100971	-0.0441187	0.971227
Amot	-0.0134775		-0.0819787	0.999639	0.448159	0.525471	0.0716104	0.928627	-0.0925099
Amotl1	0.144093	0.999992	-0.00406052	0.999639	1.17249	0.016377	1.17951	0.00540755	-0.877718	0.242411
Amotl2	-0.018874		0.0326478	0.999639	-0.274175	0.745505	-0.156612	0.856143	0.0137171
Ampd1	-0.0217484		-0.00501297	0.999639	-0.828463	0.331939	-0.916733		0.121019
Ampd2	0.0278361	0.999992	-0.0980668	0.999639	1.15129	1.40326e-15	1.00102	8.67327e-11	0.160487	0.85056
Ampd3	0.127602	0.999992	0.106928	0.999639	-0.588745	0.0136632	-0.42154	0.152793	0.232529	0.814558
Amph	0.0331336		0.105276	0.999639	-0.105727	0.913826	0.840854	0.34528	-1.07993	0.235024
Amt	0.0899949	0.999992	-0.0792694	0.999639	-0.593726	0.270984	-0.944984	0.113419	0.281809	0.837314
Amtn									-0.0950052
Amy1	0.00492309		0.0116927	0.999639	-0.127461		0.0220582		0.648155	0.519858
Amy2a3
Amy2a4
Amy2a5
Amy2b	0.00233947		0.0164922	0.999639	-0.62457		-0.424683		-0.211557
Amz1	0.00759735	0.999992	0.229773	0.999639	-0.426961	0.28947	0.107789	0.821233	0.309623	0.707763
Amz2	-0.0569717	0.999992	-0.0666356	0.999639	-0.241328	0.248648	-0.360874	0.133307	-0.271361	0.682915
Anapc1	0.0104351	0.999992	-0.137698	0.999639	0.591352	4.70533e-09	0.409636	0.00104319	0.0538697	0.943796
Anapc10	-0.0355822	0.999992	0.00512266	0.999639	0.226031	0.517673	0.211451	0.595487	-0.490636	0.44506
Anapc11	-0.182891	0.999992	-0.169271	0.999639	0.647512	0.00527306	0.387642	0.150798	-0.357945	0.505541
Anapc13	0.0584317	0.999992	0.0780965	0.999639	1.3507	0.000109399	1.47939	7.82609e-07	0.215109	0.802446
Anapc15	-0.0392206	0.999992	-0.0464386	0.999639	1.06924	1.42101e-05	0.955451	0.00147245	-0.231874	0.673543
Anapc16	-0.152745	0.999992	-0.0756238	0.999639	0.0281368	0.892068	-0.0942422	0.671835	-0.09754	0.891686
Anapc2	0.0714474	0.999992	-0.153071	0.999639	-0.130944	0.421194	-0.375526	0.132032	0.117855	0.837314
Anapc4	-0.121765	0.999992	-0.00234122	0.999639	0.0188076	0.934295	-0.0149822	0.956157	-0.148425	0.848411
Anapc5	0.0229264	0.999992	-0.0342279	0.999639	0.755729	8.0794e-13	0.673246	0.00111374	-0.132434	0.746848
Anapc7	-0.0128351	0.999992	-0.03297	0.999639	0.234131	0.228624	0.15445	0.559664	0.29649	0.544342
Ang	0.0284035		0.0778776	0.999639	1.13079		1.85426		-0.227669
Ang2
Ang3
Ang4
Ang5
Ang6
Angel1	0.0239343	0.999992	0.0563685	0.999639	-0.798218	0.00520108	-0.701381	0.0371784	0.0532253	0.971104
Angel2	0.00212772	0.999992	0.0854036	0.999639	-0.062982	0.675295	0.00360476	0.986666	-0.0513558	0.92491
Angpt1	0.0567542		0.0480485	0.999639	-0.851807	0.312133	-0.370147	0.682057	-0.592088
Angpt2	0.076704	0.999992	-0.228486	0.999639	0.84676	0.00344145	0.451768	0.153677	-0.171098	0.893237
Angpt4	-0.0472596		0.0101641	0.999639	-1.45378	0.072147	-1.38846		-0.395287
Angptl1	-0.0050134	0.999992	-0.0441814	0.999639	-1.19699	9.53443e-09	-1.28864	4.76191e-07	-0.690159	0.372684
Angptl2	-0.0301119	0.999992	-0.0320979	0.999639	-1.38749	5.27415e-06	-1.45612	0.000332995	-0.662372	0.544342
Angptl3	0.0368259		0.159792	0.999639	-0.416895		0.70517	0.388275	-0.350329
Angptl4	0.0341054	0.999992	-0.164928	0.999639	2.14032	4.03699e-08	1.80949	1.74371e-05	0.021515	0.982888
Angptl6	0.0127528		0.0380817	0.999639	0.46698	0.507056	0.594393	0.377133	0.137715
Angptl7	0.0356796	0.999992	0.017925	0.999639	-0.474489	0.274018	-0.459625	0.401203	-0.170042	0.911546
Ank	0.127054	0.999992	0.010797	0.999639	-1.3358	7.88047e-09	-1.32256	1.24372e-05	-0.129498	0.912557
Ank1	0.130358	0.999992	0.132789	0.999639	0.520355	0.481483	1.78499	0.00865183	-1.01183
Ank2	0.0318663	0.999992	0.0816551	0.999639	-1.01943	0.0599769	-0.777302	0.15922	-0.356432	0.792496
Ank3	0.111897	0.999992	0.100842	0.999639	-0.453803	0.440673	0.0640051	0.939134	-0.714355	0.481914
Ankar			-0.0166954	0.999639	0.319138				-0.202686
Ankdd1b	0.101198	0.999992	0.0724508	0.999639	-0.18292	0.73288	-0.0352149	0.954064	-0.188693	0.880302
Ankef1									-0.131051
Ankfn1	0.00741789								-0.186195
Ankfy1	0.0180749	0.999992	-0.0505257	0.999639	-0.150791	0.261424	-0.240178	0.10241	-0.0805685	0.875668
Ankhd1	0.0144851	0.999992	-0.0919177	0.999639	-0.336689	0.00136219	-0.474835	0.00404234	0.286409	0.520686
Ankib1	-0.0573512	0.999992	0.0600993	0.999639	-0.340253	0.0138109	-0.302147	0.0258974	-0.101464	0.865513
Ankk1									-0.159387
Ankle1	0.121698	0.999992	-0.0875138	0.999639	2.70718	2.02257e-26	2.50014	2.57069e-16	0.185472	0.863281
Ankle2	-0.0569745	0.999992	0.0253603	0.999639	0.0595147	0.671219	0.0548262	0.728416	-0.25858	0.533679
Ankmy1	-0.0155824		0.0277681	0.999639	-1.16105		-0.81574		-0.215272
Ankmy2	0.0332394	0.999992	-0.00367798	0.999639	-0.14222	0.587069	-0.176703	0.597189	-0.0858765	0.929297
Ankra2	-0.114371	0.999992	-0.0190411	0.999639	-0.387613	0.0822501	-0.442887	0.0608921	-0.362776	0.546293
Ankrd1	0.000453335		-0.0146971	0.999639	0.0859594		-0.250805		-0.159387
Ankrd10	0.10489	0.999992	-0.0888339	0.999639	0.367387	0.00293187	0.233669	0.131473	0.179123	0.711217
Ankrd11	0.093593	0.999992	0.021586	0.999639	-0.456679	6.91393e-05	-0.450808	0.0788927	0.552073	0.439967
Ankrd12	0.0532829	0.999992	0.0395518	0.999639	-1.22199	2.49202e-18	-1.19768	2.60788e-14	0.621541	0.099242
Ankrd13a	-0.0717557	0.999992	-0.0500635	0.999639	0.453756	0.000571798	0.36375	0.00774767	0.580655	0.105439
Ankrd13b	-0.0037111		-0.0171058	0.999639	4.09329	2.21928e-37	4.04472	1.12334e-34	0.855059	0.144404
Ankrd13c	0.133748	0.999992	-0.101973	0.999639	-0.0236638	0.911933	-0.183228	0.422957	0.118523	0.801599
Ankrd13d	0.0863393	0.999992	-0.0485083	0.999639	-0.573811	0.0292436	-0.682489	0.117319	0.723027	0.360062
Ankrd16	-0.03399	0.999992	0.0170642	0.999639	-0.819866	4.32688e-06	-0.796721	0.0161455	0.204457	0.827656
Ankrd17	0.0362144	0.999992	-0.0454135	0.999639	0.195498	0.0822822	0.112299	0.446594	0.128053	0.76922
Ankrd2	0.0138894		0.0117658	0.999639	0.324002		0.581339		0.0815178
Ankrd22			0.0240211	0.999639			0.404275		-0.0230857
Ankrd23	0.149448	0.999992	-0.0314159	0.999639	-0.551247	0.0509052	-0.631935	0.0392669	0.322745	0.787649
Ankrd24	0.106267	0.999992	0.0427032	0.999639	-0.533739	0.161788	-0.465564	0.284671	0.511769	0.579101
Ankrd26	0.068331	0.999992	-0.0355679	0.999639	0.473859	0.0260446	0.375376	0.260098	0.697445	0.272754
Ankrd27	0.0118082	0.999992	-0.0696344	0.999639	0.217051	0.225367	0.0949801	0.669186	0.168724	0.767545
Ankrd28	0.148826	0.999992	-0.064279	0.999639	0.597335	0.000249176	0.470899	0.0520862	-0.223368	0.827388
Ankrd29	-0.0060102				-0.406478		-0.461162		-0.793927
Ankrd32	0.0848909	0.999992	0.0739348	0.999639	0.494847	0.0211593	0.587412	0.0815991	-0.109577	0.930416
Ankrd33	0.0078276								-0.0137882
Ankrd33b	0.0292072	0.999992	-0.330068	0.999639	-1.71313	1.18991e-06	-2.61426	5.63599e-11	-0.0700085	0.963611
Ankrd34a	0.0365222		-0.03408	0.999639	0.371117		-0.0294721		-0.0755509
Ankrd34b	0.0193696		0.00666031	0.999639	0.139076		0.267681		-0.283659
Ankrd34c			0.0456583	0.999639			0.717429
Ankrd35	0.0101724		0.0263532	0.999639	1.10912	0.182287	1.47139	0.0769348	-0.0989747
Ankrd36	0.00444849		0.0139419	0.999639	-0.280203		0.00217195		-0.340174
Ankrd37	0.0598066	0.999992	0.119244	0.999639	0.669764	0.13403	0.896362	0.0380216	-0.786301	0.250555
Ankrd39	-0.0316992	0.999992	-0.00381917	0.999639	-0.554808	0.0370096	-0.586375	0.0408553	-0.120294	0.914467
Ankrd40	0.034773	0.999992	-0.0399344	0.999639	0.395144	0.0077406	0.320972	0.0696728	0.068357	0.915266
Ankrd42	-0.026649		-0.0523319	0.999639	-0.291823	0.721542	-0.641464	0.455733	0.31433
Ankrd44	0.064777	0.999992	0.00279345	0.999639	-0.93538	1.50368e-15	-0.958934	9.33007e-09	-0.3368	0.535498
Ankrd45	-0.00797549		0.00106322	0.999639	-0.0394241		-0.033824		-0.125551
Ankrd46	-0.063727	0.999992	-0.0409671	0.999639	-0.484676	0.0160018	-0.572187	0.00462649	-0.0903354	0.920477
Ankrd49	0.0799868	0.999992	0.0678286	0.999639	0.663953	0.000806862	0.724404	0.00343768	-0.297814	0.519657
Ankrd50	-0.0466106	0.999992	0.00904952	0.999639	-0.566753	0.00342122	-0.585815	0.00866177	-0.244288	0.858339
Ankrd52	0.0804892	0.999992	-0.111148	0.999639	-0.0763554	0.701143	-0.27325	0.342055	0.107516	0.843779
Ankrd53	0.0316066		-0.0294927	0.999639	-0.100949	0.892319	-0.266327	0.727935	-0.324931	0.816077
Ankrd54	-0.049967	0.999992	0.0173903	0.999639	0.298976	0.0796304	0.283823	0.170602	0.194351	0.677961
Ankrd55	-0.0422572	0.999992	-0.121892	0.999639	-0.0634389	0.935777	-0.663085	0.384173	-0.855955
Ankrd6	0.00990476	0.999992	0.253676	0.999639	0.322656	0.588169	0.817216	0.114915	-0.156373	0.922086
Ankrd60	-0.0156892		-0.0106276	0.999639	-0.492301		-0.734333		-0.153375
Ankrd61	0.0517842	0.999992	0.0127207	0.999639	-0.828596	0.0168618	-0.83372	0.0290618	-0.30405	0.749981
Ankrd63	0.0246553		0.0831787	0.999639	0.346675	0.702372	0.984316	0.18878	-0.15735
Ankrd7	0.00032387		0.0130379	0.999639	-0.360294		-0.197759		0.179344
Ankrd9	-0.119014	0.999992	-0.170656	0.999639	0.842491	0.00232737	0.563945	0.0708343	0.400984	0.627881
Anks1	0.0462571	0.999992	0.0180975	0.999639	0.0370905	0.831126	0.0260127	0.941346	0.869166	0.00425663
Anks1b	0.0548697		0.0884786	0.999639	-0.91665		-0.138203		-0.785151
Anks3	0.0305854	0.999992	-0.0566563	0.999639	-0.773258	3.20644e-06	-0.881628	0.000519469	0.0164608	0.981216
Anks4b			0.0130379	0.999639			0.231711		-0.217528
Anks6	-0.0280175		0.0281595	0.999639	-0.420425	0.623622	-0.201961	0.831795	0.0107341
Ankub1	-0.0198538		-0.0744349	0.999639	-0.667768	0.311904	-1.08678	0.0968052	-0.37
Ankzf1	0.0703	0.999992	0.0126001	0.999639	-0.279515	0.133202	-0.293947	0.212187	0.215826	0.749028
Anln	0.118078	0.999992	-0.0867745	0.999639	3.18629	2.45172e-57	2.9733	1.185e-25	0.12639	0.839189
Ano1	-0.00275894		-0.0220454	0.999639	-0.4134		-0.600824		0.501691
Ano10	0.0396523	0.999992	0.120753	0.999639	-1.23663	3.15805e-08	-1.09017	1.71429e-07	-0.767348	0.390762
Ano2	0.0078276		-0.0104119	0.999639	0.214265				-0.184387
Ano3	0.00830743		0.0139419	0.999639			0.250342		-0.273494
Ano4	0.00807885		0.0287115	0.999639	-0.298967		0.109567		-0.486761
Ano5			0.00959026	0.999639	0.214265		0.289781		-0.491684
Ano6	0.0048349	0.999992	0.144632	0.999639	-0.431434	0.000471011	-0.292371	0.0834075	0.329367	0.692226
Ano7	0.0732599		0.0833816	0.999639	-0.622546	0.473082	0.0535343	0.956559	-0.128825
Ano8	0.0248368	0.999992	-0.100555	0.999639	0.0351437	0.90427	-0.152775	0.669163	0.72067	0.325544
Ano9	0.00175022		0.0360427	0.999639	-0.406478		0.0832473		0.0310891
Anp32a	-0.0893422	0.999992	-0.0517831	0.999639	1.20136	1.16178e-14	1.09733	1.16642e-09	-0.0429157	0.94893
Anp32b	0.103276	0.999992	-0.0942371	0.999639	0.831807	5.59771e-07	0.669127	0.00144606	0.264789	0.662941
Anp32e	-0.0227462	0.999992	-0.0576195	0.999639	1.72925	1.46949e-38	1.61487	4.76203e-16	-0.0969417	0.922086
Anpep	0.0460664		-0.0307658	0.999639	-1.1856	0.122763	-1.64279	0.0324415	-0.0471902	0.975285
Antxr1	-0.0337844	0.999992	0.197977	0.999639	-0.235879	0.640061	0.213423	0.65203	-0.0378776	0.978701
Antxr2	0.0197417	0.999992	-0.115264	0.999639	-2.31972	1.37157e-16	-2.66321	2.46019e-22	-0.628375	0.514862
Antxrl	0.00994505		0.0139419	0.999639			0.250342		-0.163598
Anxa1	0.0195292	0.999992	0.14515	0.999639	0.168508	0.698094	0.544691	0.316904	0.0951487	0.94893
Anxa10									-0.159387
Anxa11	-0.0909768	0.999992	0.0198239	0.999639	-0.264557	0.118913	-0.268624	0.283722	0.0117529	0.990426
Anxa13									-0.159387
Anxa2	0.0336513	0.999992	0.309972	0.999639	0.845158	0.00546139	1.39666	0.000564363	-0.36034	0.777867
Anxa3	0.015		-0.0507726	0.999639	-0.615491	0.446868	-1.13998	0.157517	0.311524	0.818842
Anxa4	0.0264534	0.999992	0.0261941	0.999639	-0.949129	0.0132955	-0.936675	0.00859456	-0.764167	0.47529
Anxa5	-0.157387	0.999992	-0.09142	0.999639	-1.45124	3.00448e-05	-1.69458	1.73801e-05	-0.7226
Anxa6	-0.0251179	0.999992	0.120169	0.999639	-0.390409	0.00851824	-0.272766	0.246333	-0.359988	0.738935
Anxa7	-0.0968928	0.999992	0.000811885	0.999639	-0.0677896	0.699627	-0.100145	0.574747	-0.287349	0.571267
Anxa8	0.0122276								0.146542
Anxa9	0.0823447	0.999992	0.182418	0.999639	-1.02077	0.028918	-0.558296	0.245865	0.297173	0.746131
Aoah	0.0111706	0.999992	0.0492362	0.999639	-1.4862	0.0394559	-0.99165	0.21423	-0.195574	0.897007
Aoc1			0.0135707	0.999639			0.24385		-0.18139
Aoc2	0.0748557	0.999992	-0.189315	0.999639	0.055618	0.863137	-0.345874	0.357384	-0.0556432	0.960712
Aoc3	0.0464775		-0.0175936	0.999639	0.344423		0.197685		-0.21247
Aox1	0.00938951		0.0344818	0.999639			0.567384		-0.0510493
Aox2	0.0117093		0.0507861	0.999639	-0.16016	0.867667	0.252392	0.793912	-0.458647	0.716607
Aox3	0.0078276		0.00835117	0.999639	0.226023		0.289781		-0.351503
Aox4	0.00863568		0.00152166	0.999639	-0.347448		-0.391456		-0.157119
Ap1ar	-0.113588	0.999992	-0.138916	0.999639	0.747898	2.55196e-08	0.549005	0.00112223	0.36088	0.659139
Ap1b1	-0.0472696	0.999992	-0.0287728	0.999639	-0.17296	0.224679	-0.244226	0.27842	0.314809	0.46697
Ap1g1	-0.050848	0.999992	-0.110748	0.999639	-0.00689467	0.964257	-0.162348	0.276542	-0.0175175	0.976389
Ap1g2	0.0284769	0.999992	0.0808483	0.999639	-0.402697	0.00731593	-0.322485	0.171539	0.093025	0.91423
Ap1m1	-0.0251359	0.999992	0.0593228	0.999639	0.038368	0.817112	0.0761903	0.748215	0.0419251	0.957334
Ap1m2	-0.060027	0.999992	0.13467	0.999639	-0.789204	0.0904188	-0.44406	0.360096	-0.27187	0.842149
Ap1s1	-0.0675332	0.999992	0.037787	0.999639	1.88721	4.69645e-11	1.8825	1.41271e-07	0.156667	0.834747
Ap1s2	0.0134117	0.999992	0.133082	0.999639	-0.890826	0.000527805	-0.56877	0.190321	-0.783875	0.40413
Ap1s3	0.0360814	0.999992	-0.0683277	0.999639	-0.262047	0.122235	-0.381361	0.0381598	-0.3731	0.39241
Ap2a1	0.0162477	0.999992	-0.0215536	0.999639	0.146101	0.32305	0.0824981	0.74065	0.435299	0.190579
Ap2a2	0.00518323	0.999992	-0.00793914	0.999639	0.0811824	0.65242	0.0388371	0.877994	-0.0285517	0.971457
Ap2b1	-0.0397879	0.999992	-0.101348	0.999639	-0.0185353	0.887507	-0.161934	0.198099	-0.07457	0.90423
Ap2m1	-0.121826	0.999992	-0.0156937	0.999639	0.49448	0.000514352	0.439066	0.0432294	0.00119942	0.997468
Ap2s1	-0.189183	0.999992	-0.135926	0.999639	0.914092	8.36758e-08	0.716634	9.54694e-05	-0.0896994	0.918105
Ap3b1	-0.0600596	0.999992	-0.0516719	0.999639	-0.11599	0.431967	-0.218586	0.354196	0.447924	0.0529294
Ap3b2	0.00806397		-0.000166378	0.999639	-0.200633		-0.220631		-0.333624
Ap3d1	0.0551164	0.999992	-0.0675468	0.999639	-0.50674	1.76303e-05	-0.622242	0.00237971	0.249242	0.685773
Ap3m1	-0.0357778	0.999992	0.0719333	0.999639	0.151847	0.350185	0.21712	0.442145	-0.378203	0.534241
Ap3m2	0.0828263	0.999992	0.0809433	0.999639	-1.402	2.14411e-13	-1.27043	2.63621e-06	-0.0102701	0.992802
Ap3s1	0.0564984	0.999992	0.0615867	0.999639	1.04845	0.00283417	1.1228	0.0116024	-0.0512426	0.965445
Ap3s2	-0.00404651	0.999992	-0.117993	0.999639	0.527041	0.001703	0.350413	0.0518158	-0.0540828	0.942151
Ap4b1	0.0113322	0.999992	-0.00696397	0.999639	-0.751478	1.11823e-06	-0.792479	1.35537e-05	-0.174191	0.797949
Ap4e1	0.0661268	0.999992	-0.0927593	0.999639	-0.161643	0.31647	-0.304138	0.0765582	-0.0417245	0.956166
Ap4m1	-0.020221	0.999992	-0.0991386	0.999639	0.388953	0.0701754	0.222072	0.351273	0.22554	0.77003
Ap4s1	0.0625432	0.999992	-0.0120543	0.999639	0.170914	0.456596	0.126844	0.649958	0.111043	0.870281
Ap5b1	0.0340459	0.999992	-0.0804086	0.999639	-0.732052	2.51661e-06	-0.8689	4.8122e-05	0.238787	0.727099
Ap5m1	-0.101643	0.999992	-0.0446603	0.999639	-0.213069	0.214726	-0.292361	0.214061	-0.570702	0.275675
Ap5s1	-0.120957	0.999992	-0.126568	0.999639	-0.261812	0.465672	-0.517756	0.143914	0.024043	0.980995
Ap5z1	0.141259	0.999992	-0.00506981	0.999639	-0.551846	0.000840704	-0.58622	0.0116136	0.137211	0.91431
Apaf1	-0.0277841	0.999992	-0.101327	0.999639	0.489035	0.000206109	0.331888	0.0993307	-0.194698	0.738935
Apba1	-0.0522602	0.999992	0.0689356	0.999639	-0.995517	0.0639127	-0.773034	0.148536	-1.04393	0.214228
Apba2	0.0104666		0.0949462	0.999639	-0.581393	0.484741	-0.0126414	0.989726	-0.175307
Apba3	-0.0253668	0.999992	-0.116406	0.999639	0.208034	0.302841	0.0164215	0.956559	0.0469948	0.961928
Apbb1	0.0131895	0.999992	0.0101435	0.999639	0.04125	0.931898	0.030675	0.954335	0.00576565	0.995857
Apbb1ip	0.0745207	0.999992	0.0834205	0.999639	-0.630217	0.00022283	-0.538348	0.0181587	0.0512194	0.939111
Apbb2	0.071781	0.999992	-0.0572398	0.999639	-0.0286236	0.963521	-0.222813	0.707269	0.16442	0.920216
Apbb3	-0.012604	0.999992	-0.0140651	0.999639	-0.740467	0.000297192	-0.785825	0.00300234	0.181137	0.848302
Apc	0.0269668	0.999992	0.0168957	0.999639	-0.162683	0.178515	-0.176403	0.294053	0.244354	0.591944
Apc2	0.0048502	0.999992	0.0944152	0.999639	-1.09104	9.58603e-05	-0.883419	0.026776	0.392456	0.696161
Apcdd1	-0.0169071		0.0331969	0.999639	0.531788		0.781212		0.0047047
Apcs			-0.0104119	0.999639	0.214265
Apeh	0.0167628	0.999992	0.148908	0.999639	-0.141783	0.352388	0.00146505	0.994938	0.105718	0.887279
Apex1	-0.181799	0.999992	-0.0341904	0.999639	1.41244	2.74894e-08	1.3095	3.42942e-05	0.0526048	0.950539
Apex2	0.0887592	0.999992	-0.0460308	0.999639	0.0372494	0.887572	-0.0722048	0.830587	-0.0920105	0.922086
Aph1a	0.0498834	0.999992	-0.0150781	0.999639	0.68769	0.000128994	0.639455	0.00137132	-0.252571	0.563666
Aph1b	0.015365	0.999992	-0.224845	0.999639	0.442955	0.33738	-0.0942174	0.863695	-0.769823	0.343431
Aph1c	-0.0503912	0.999992	0.0399686	0.999639	-1.08727	0.100949	-0.949331	0.140437	-0.944606	0.282685
Api5	-0.0659453	0.999992	0.0679985	0.999639	0.971285	2.44407e-15	1.01629	0.000397388	-0.205235	0.776105
Apip	8.34033e-05	0.999992	-0.0442053	0.999639	1.23383	0.00422452	1.10243	0.00679428	-0.534294	0.465623
Apitd1	0.0341782	0.999992	-0.0150989	0.999639	1.32542	1.09205e-05	1.26914	0.000210324	0.517827	0.411192
Aplf	0.0929398	0.999992	-0.0412131	0.999639	0.0460932	0.882808	-0.0462068	0.904068	-0.15785	0.829181
Apln	0.0507523		0.151042	0.999639	-0.69544		0.439936	0.614304	-0.862574
Aplnr	0.0372028		-0.0885324	0.999639	0.244248	0.796081	-0.436051		0.152494
Aplp1	-0.0359375		0.0285026	0.999639	-0.736503		-0.364875		-0.329727
Aplp2	-0.168214	0.999992	-0.147504	0.999639	0.0755512	0.760719	-0.144469	0.624506	-0.246678	0.792819
Apmap	-0.0308468	0.999992	-0.126354	0.999639	0.491105	0.0210754	0.285333	0.277519	-0.227474	0.682915
Apoa1	0.00872066		-0.0116625	0.999639	-0.00259576		-0.250805
Apoa1bp	-0.0122273	0.999992	-0.150573	0.999639	0.559798	0.00625951	0.322852	0.206126	-0.214402	0.741312
Apoa2	-0.00420767		0.00267319	0.999639	0.179459		0.216171		-0.0190597
Apoa4									0.123154
Apoa5	0.0239088								-0.205739
Apob	-0.000740746		0.0803868	0.999639	-0.291677		0.69275		-0.427178
Apobec1	0.183864	0.999992	0.105401	0.999639	0.77601	1.29088e-06	0.884687	0.000609386	0.263933	0.780593
Apobec2	-0.0362808	0.999992	0.14375	0.999639	0.181739	0.661429	0.421012	0.240811	-0.559983	0.591873
Apobec3	-0.145052	0.999992	0.277216	0.999639	-0.688696	2.52513e-06	-0.375756	0.011662	0.306214	0.746216
Apobec4	0.0387924		-0.024838	0.999639	-0.683256		-1.05184		0.111318
Apobr	0.0272686	0.999992	0.172092	0.999639	-0.749207	0.159119	-0.350333	0.533598	-0.000167015	0.999765
Apoc1	-0.0028195		0.0459342	0.999639	-0.611138	0.484214	-0.212066	0.82851	-0.102625
Apoc2	-0.0120263		0.00321449	0.999639	-0.767143		-0.692436		-0.0682395
Apoc3									-0.102625
Apoc4	0.00766811								-0.102625
Apod	0.0301627		-0.0975231	0.999639	0.470947	0.593741	-0.389515		-0.00667559
Apoe	-0.0170107	0.999992	0.0902962	0.999639	-1.04612	2.14535e-06	-0.89949	0.0106527	0.310549	0.746848
Apof	0.0317942	0.999992	0.144808	0.999639	-0.320216	0.599121	0.0847986	0.894611	-0.874948
Apoh			0.0232495	0.999639	0.228199		0.591064		-0.0766352
Apol10a	0.00540141		0.122912	0.999639	-0.0327867		1.14052		-0.241192
Apol10b	-0.0507135		-0.032625	0.999639	-1.00345	0.224679	-1.50034		-0.0126124
Apol11a			0.0130379	0.999639			0.231711		-0.224689
Apol11b	0.0727867	0.999992	0.155502	0.999639	-0.295477	0.698094	0.554182	0.509322	-0.390189
Apol6	0.0947085		0.0283096	0.999639	-0.837793	0.231579	-0.728291	0.301612	-0.366637
Apol7a									0.257019
Apol7b									-0.102625
Apol7c	-0.0951862	0.999992	-0.0852108	0.999639	-1.02956	0.0933821	-1.55046	0.0296104	0.364179	0.790442
Apol7e	0.00952614		0.0153195	0.999639	-1.48468	0.0552696	-1.37203	0.0847848	0.227629	0.881403
Apol8	0.0691779		0.131879	0.999639	-0.380889	0.675675	0.6314	0.461666	-0.163101
Apol9a	0.00766811								-0.0212424
Apol9b	0.0434235		-0.0111212	0.999639	-0.0216885		-0.250805		0.230464
Apold1	0.00738029		0.0446306	0.999639	1.1246	0.147049	1.42554	0.0556315	0.00249848
Apom	-0.0909814	0.999992	-0.101729	0.999639	-0.647179	0.295321	-1.21566	0.0550033	-0.209509
Apon	0.015821		-0.0286799	0.999639	1.06754	0.186	1.01214	0.22188	-0.120521
Apoo	0.00610415	0.999992	-0.0241231	0.999639	1.57548	8.82986e-05	1.39282	0.0139049	-0.331608	0.738935
Apool	-0.0516865	0.999992	0.0604053	0.999639	0.799196	0.00509008	0.863835	0.0269132	-0.512118	0.372684
Apopt1	-0.0194566	0.999992	-0.0498009	0.999639	-0.0487035	0.849161	-0.148023	0.515915	0.32029	0.584305
App	0.0458284	0.999992	0.0409464	0.999639	-1.10932	0.0223748	-0.929728	0.121898	-0.0611226	0.96757
Appbp2	0.00289852	0.999992	-0.137561	0.999639	0.340596	0.0518247	0.131384	0.594339	0.0709471	0.921632
Appbp2os	-0.012452		0.00618306	0.999639	-0.695176	0.289825	-0.71198	0.268124	-0.13617
Appl1	-0.019559	0.999992	0.0179713	0.999639	-0.0283211	0.879332	-0.0301264	0.921459	-0.538433	0.387142
Appl2	-0.00612586	0.999992	0.0267561	0.999639	-1.17083	4.44522e-07	-1.15077	3.31365e-05	0.00242138	0.997468
Aprt	-0.0633411	0.999992	-0.0560031	0.999639	1.32122	1.16148e-12	1.19782	1.3216e-05	-0.0648069	0.935984
Aptx	0.0471447	0.999992	0.154401	0.999639	-0.740984	0.000191889	-0.557614	0.0159818	-0.159248	0.822792
Aqp1	0.082629		0.0908634	0.999639	1.92471	0.00161337	2.30705	0.000134626	0.487365
Aqp11	0.0172749		-0.0191956	0.999639	0.808151	0.23726	0.742536	0.288302	0.276052
Aqp12	0.00830743
Aqp2	0.0078276		-0.0104119	0.999639	0.214265				0.164063
Aqp3	-0.0344084		0.080297	0.999639	-0.988699	0.191366	-0.587216	0.468756	-0.023586
Aqp4	0.00288063		0.0139419	0.999639	-0.406478		-0.227008		-0.190909
Aqp5									0.520845
Aqp6	0.000860462		0.0358813	0.999639	-0.280203		0.349716		-0.431276
Aqp7	0.0392881	0.999992	0.196287	0.999639	-1.0879	0.0801417	-0.366053	0.560197	-0.747319	0.466383
Aqp8			0.0130379	0.999639			0.231711		0.123154
Aqp9	-0.0223226		-0.0279141	0.999639	0.00630601	0.995664	-0.396076		-0.289169
Aqr	0.00805017	0.999992	-0.139884	0.999639	0.283975	0.0175704	0.0833107	0.674345	0.0994661	0.843606
Ar	-0.00403547		0.0135707	0.999639	-1.14631		-0.959154		0.264281
Araf	0.0412363	0.999992	-0.0444652	0.999639	-0.654209	5.22102e-08	-0.738627	1.78004e-05	-0.00801598	0.989521
Arap1	0.060537	0.999992	0.0526328	0.999639	-0.609076	1.74625e-07	-0.560562	0.0149774	0.413077	0.435267
Arap2	0.0241901	0.999992	0.11376	0.999639	-1.47879	2.3251e-31	-1.36097	1.80656e-16	-0.324962	0.797245
Arap3	-0.00836427	0.999992	0.0300601	0.999639	-0.829684	0.0808632	-0.771222	0.105695	0.752349	0.385306
Arc	-0.0317575	0.999992	-0.0022273	0.999639	0.719616	0.132234	0.701616	0.114183	0.400942	0.759912
Arcn1	-0.117844	0.999992	-0.0599502	0.999639	0.504567	2.98525e-05	0.391208	0.0778157	-0.206882	0.697887
Areg			0.0130379	0.999639			0.231711		-0.346662
Arel1	0.0665124	0.999992	0.0758129	0.999639	0.161531	0.172246	0.214047	0.206658	0.192704	0.746848
Arf1	-0.139027	0.999992	0.00431516	0.999639	0.606706	3.6556e-07	0.57728	0.00260099	-0.077766	0.907518
Arf2	-0.0328268	0.999992	-0.103803	0.999639	0.331425	0.129688	0.169366	0.510509	-0.401189	0.646424
Arf3	0.014259	0.999992	-0.0444822	0.999639	-0.146373	0.307251	-0.227442	0.204705	-0.205177	0.745807
Arf4	0.0441459	0.999992	-0.0185731	0.999639	0.44768	0.00183447	0.391759	0.0990114	-0.47	0.518422
Arf5	-0.0900018	0.999992	-0.112896	0.999639	0.579923	0.00228206	0.405378	0.0490525	-0.275754	0.582797
Arf6	0.0781411	0.999992	0.160892	0.999639	0.466103	0.00023372	0.678846	0.030958	0.0807279	0.91952
Arfgap1	0.0128372	0.999992	-0.0357435	0.999639	-0.236486	0.122834	-0.31515	0.154206	0.188772	0.789687
Arfgap2	-0.0709304	0.999992	-0.0910145	0.999639	-0.128835	0.532664	-0.283716	0.229218	0.129509	0.851094
Arfgap3	-0.0493414	0.999992	0.0890862	0.999639	-0.953456	0.00446652	-0.799132	0.0213156	-0.0151102	0.987338
Arfgef1	0.00151927	0.999992	0.0764085	0.999639	-0.619517	2.25834e-06	-0.549614	0.00128927	-0.0332691	0.960712
Arfgef2	0.0975789	0.999992	-0.0441815	0.999639	-0.11105	0.411151	-0.201497	0.447179	-0.354228	0.496636
Arfgef3	0.0409864		-0.0281455	0.999639	0.0184171		-0.524805		0.1279
Arfip1	0.0835571	0.999992	0.0570909	0.999639	0.221726	0.250041	0.273643	0.342368	-0.276915	0.727046
Arfip2	0.0181646	0.999992	0.0578588	0.999639	0.392778	0.0380695	0.428367	0.0395235	0.0468138	0.958795
Arfrp1	-0.0157809	0.999992	0.0140596	0.999639	-0.477887	0.00645273	-0.487962	0.0394856	-0.0177577	0.981979
Arg1	0.113284	0.999992	-0.00934872	0.999639	0.31045	0.607884	0.259461	0.665094	-0.502188	0.680719
Arg2	-0.0280667	0.999992	0.148535	0.999639	-1.50759	0.0145968	-0.855835	0.143478	-0.00770722
Arglu1	0.102606	0.999992	0.0977806	0.999639	0.280782	0.0514933	0.359482	0.0260342	0.384306	0.575524
Arhgap1	-0.0452091	0.999992	-0.126832	0.999639	-0.368986	0.00940519	-0.550179	0.000220186	-0.191454	0.711116
Arhgap10	0.0114882	0.999992	0.000628321	0.999639	0.530011	0.234818	0.507846	0.268095	0.77038	0.431284
Arhgap11a	0.015399	0.999992	0.0191384	0.999639	1.62192	7.66339e-30	1.60779	1.95627e-19	0.0366937	0.956635
Arhgap12	-0.0467176	0.999992	0.0509233	0.999639	-0.104894	0.539446	-0.0642942	0.802783	0.122587	0.870608
Arhgap15	0.00984733	0.999992	0.211284	0.999639	-0.482566	7.63227e-05	-0.232141	0.353605	-0.460664	0.197481
Arhgap17	0.10842	0.999992	0.0267163	0.999639	-0.728518	6.01372e-07	-0.705142	0.0120057	-0.177152	0.822792
Arhgap18	-0.0379786	0.999992	0.0414079	0.999639	0.0513634	0.868427	0.0874124	0.814678	-0.152836	0.917667
Arhgap19	0.0494273	0.999992	-0.174544	0.999639	1.91256	3.80246e-19	1.63736	4.76706e-08	-0.121631	0.865513
Arhgap20	-0.00468123		0.0182816	0.999639	0.0638769		0.271027		-0.0737015
Arhgap20os	-0.010666				-0.360294		-0.34326		-0.17956
Arhgap21	0.151566	0.999992	-0.0371984	0.999639	0.370096	0.0335714	0.279477	0.263702	0.265857	0.739536
Arhgap22	0.0343		0.0859868	0.999639	-0.385982	0.646052	0.051809	0.953939	-0.555208	0.655182
Arhgap23	0.134667	0.999992	0.285561	0.999639	0.556291	0.274941	1.18299	0.0047205	0.635445	0.5246
Arhgap24	0.0174816	0.999992	-0.0626433	0.999639	-2.3415	5.28536e-35	-2.45471	2.6969e-23	-0.267811	0.835076
Arhgap25	0.0757698	0.999992	0.120889	0.999639	-1.26732	1.1459e-33	-1.12116	3.99863e-07	-0.0587659	0.948106
Arhgap26	0.0841751	0.999992	0.0829985	0.999639	-1.80302	2.15336e-54	-1.61818	5.55134e-07	0.418086	0.469993
Arhgap27	0.086973	0.999992	0.0934752	0.999639	-0.27053	0.0500883	-0.178242	0.430415	0.191103	0.778508
Arhgap28	0.0231582		0.0113196	0.999639	0.201586		0.433983		-0.273492
Arhgap29	-0.0134855		0.204846	0.999639	1.47215	0.000822886	1.81444	0.000138755	-0.269297	0.822792
Arhgap30	0.109267	0.999992	0.0659797	0.999639	-0.253019	0.0204972	-0.215308	0.0982518	-0.149987	0.780593
Arhgap31	-0.00341222	0.999992	0.0329115	0.999639	-1.79651	6.64547e-13	-1.75882	2.14252e-11	0.286419	0.827388
Arhgap32	0.0803624	0.999992	0.133362	0.999639	-0.628119	0.201571	-0.325603	0.505006	-0.100033	0.952627
Arhgap33	0.141902	0.999992	-0.0360065	0.999639	1.28096	8.6548e-09	1.14978	0.000548419	0.578054	0.553988
Arhgap35	0.100069	0.999992	-0.132937	0.999639	0.0712679	0.668262	-0.12801	0.57753	0.394685	0.518822
Arhgap36	0.0078276								-0.211557
Arhgap39	0.0312478	0.999992	-0.0168655	0.999639	-0.111021	0.665405	-0.172857	0.589511	-0.087148	0.950471
Arhgap4	0.166971	0.999992	0.0637063	0.999639	-0.930136	4.34443e-14	-0.865705	0.000146102	-0.283937	0.746848
Arhgap40									-0.0413603
Arhgap42	0.0078276		0.0456583	0.999639			0.717429		0.358666
Arhgap44	-0.0511258		-0.0627362	0.999639	0.0282098	0.974028	-0.424489	0.612737	-0.0495839
Arhgap5	0.0374731	0.999992	0.205753	0.999639	-0.953478	0.00184173	-0.515849	0.203485	-1.91977	0.00074788
Arhgap6	-0.0994558	0.999992	-0.096506	0.999639	-2.20423	1.94456e-10	-2.56186	5.11963e-13	-0.597937	0.596073
Arhgap8	0.122002	0.999992	-0.124841	0.999639	-0.0186	0.984199	-1.29564	0.0944797	0.537406
Arhgap9	-0.00767789	0.999992	0.0661792	0.999639	-0.344418	0.0045559	-0.302486	0.0447597	0.33188	0.631674
Arhgdia	-0.0757684	0.999992	0.0100716	0.999639	0.390352	0.00464776	0.368283	0.0212509	-0.0134482	0.980256
Arhgdib	-0.0286731	0.999992	0.122323	0.999639	0.204125	0.231364	0.345498	0.206203	0.00620491	0.991743
Arhgdig	0.0240207		0.0525174	0.999639	1.94604	0.00779064	2.06534	0.007904	-0.154022
Arhgef1	0.1412	0.999992	0.0552319	0.999639	-0.792829	8.6548e-09	-0.729334	0.00692337	0.552528	0.495966
Arhgef10	-0.0964022	0.999992	-0.0209535	0.999639	-1.86885	1.62487e-06	-1.94888	3.97332e-06	-0.13008	0.938107
Arhgef10l	-0.0540005		0.0264284	0.999639	0.561447	0.40539	0.561193	0.493805	0.260984	0.805856
Arhgef11	-0.0146571	0.999992	-0.0272191	0.999639	-0.68639	9.54501e-05	-0.751145	0.0081464	-0.219515	0.803811
Arhgef12	0.0968121	0.999992	0.112004	0.999639	-0.499008	0.0104192	-0.375785	0.0894816	-0.422988	0.701216
Arhgef15	0.104851	0.999992	0.140449	0.999639	-0.468276	0.214331	-0.248153	0.51577	0.0861759	0.943796
Arhgef16			0.0135707	0.999639			0.24385		0.180038
Arhgef17	0.0125282		0.0446117	0.999639	0.959493	0.234818	1.31985	0.0732297	0.31599
Arhgef18	0.0565414	0.999992	0.0331408	0.999639	-0.603359	7.3072e-06	-0.586837	0.00447755	0.388815	0.554969
Arhgef19	0.0078276								0.12108
Arhgef2	0.0648234	0.999992	0.00713508	0.999639	-0.551518	4.10571e-06	-0.566172	0.0136711	-0.0575188	0.945996
Arhgef25	0.043477		0.0430399	0.999639	-0.868841		-0.536257		-0.0913841
Arhgef26	0.124611	0.999992	-0.124101	0.999639	-0.0110558	0.984328	-0.360662	0.452618	-0.553249	0.606132
Arhgef28	0.020525		0.0283625	0.999639	0.548533		1.3383		0.418257
Arhgef3	-0.103065	0.999992	0.154381	0.999639	-1.13122	5.05546e-19	-0.973113	3.33219e-09	-0.75293	0.275675
Arhgef33	0.0593218		0.108156	0.999639	-0.280203		1.12034		0.131891
Arhgef37	-0.0327671		0.0821496	0.999639	-1.39869	0.0454136	-0.798018	0.295205	0.707097
Arhgef38	0.00741789		0.0139419	0.999639			0.250342		0.0894742
Arhgef39	-0.0086658	0.999992	-0.114378	0.999639	1.48815	8.18268e-06	1.2145	0.0064386	-0.0793297	0.94893
Arhgef4	0.108683	0.999992	0.0671547	0.999639	-0.537906	0.024753	-0.456588	0.136467	-0.19325	0.833386
Arhgef40	-0.00928228	0.999992	0.21984	0.999639	-0.976768	0.0372753	-0.454063	0.334388	0.644808	0.476779
Arhgef5	-0.0110751		0.0324693	0.999639	-0.866177	0.287406	-0.634597	0.455329	-0.391871
Arhgef6	-0.01744	0.999992	0.013617	0.999639	-0.200781	0.0994435	-0.219545	0.184367	-0.592399	0.143827
Arhgef7	-0.00619073	0.999992	-0.087817	0.999639	-0.269531	0.115167	-0.433545	0.151485	0.146043	0.800053
Arhgef9	0.039889		0.001429	0.999639	-0.566151	0.483124	-0.583673	0.489367	-0.250673
Arid1a	0.0473979	0.999992	-0.0553238	0.999639	-0.116503	0.30329	-0.217876	0.316944	0.439385	0.286526
Arid1b	0.0436325	0.999992	-0.00620604	0.999639	0.334098	0.000770804	0.290128	0.106622	0.591211	0.0307334
Arid2	0.0536384	0.999992	0.0352298	0.999639	0.380925	0.000622743	0.388167	0.00629428	0.0868937	0.901409
Arid3a	0.0020312	0.999992	-0.00306157	0.999639	1.07216	1.18133e-15	1.03413	9.73448e-12	-0.675582	0.312122
Arid3b	0.0474634	0.999992	0.148129	0.999639	-1.3974	2.4214e-19	-1.12487	0.000292154	-0.79957	0.382418
Arid3c	-0.00797549		0.00186707	0.999639	-0.0216885		0.00217195		-0.283017
Arid4a	0.108165	0.999992	0.00891173	0.999639	-0.71793	8.57313e-09	-0.723742	0.0080981	0.539113	0.335331
Arid4b	0.0803443	0.999992	0.0627027	0.999639	-0.765194	3.32064e-09	-0.719174	4.35074e-06	0.0276355	0.961928
Arid5a	0.00737429	0.999992	0.0823092	0.999639	-0.729178	1.30458e-07	-0.648277	0.00379903	0.229257	0.799192
Arid5b	0.056054	0.999992	0.145949	0.999639	-1.42167	1.40666e-22	-1.21542	8.84571e-07	0.268811	0.805763
Arih1	0.0539325	0.999992	0.0580998	0.999639	0.0899425	0.43087	0.133702	0.593158	-0.0796994	0.909535
Arih2	0.0480526	0.999992	-0.0741363	0.999639	-0.422433	0.000722272	-0.539917	0.000145348	0.0607327	0.922219
Arl1	-0.174916	0.999992	-0.0754925	0.999639	0.885518	8.01039e-05	0.729449	0.0228119	-0.196197	0.822792
Arl10	-0.0724151	0.999992	0.00336367	0.999639	-0.744053	0.0253453	-0.766503	0.0322145	-0.0097765	0.992802
Arl11	0.0128976		0.0416483	0.999639	-0.94731		-0.455086		-0.0737262	0.961928
Arl13a	0.113343		0.0200481	0.999639	-0.760065	0.319585	-0.712192	0.336336	-0.38846
Arl13b	-0.0621203	0.999992	0.0193246	0.999639	-0.679135	0.00258891	-0.683409	0.00401346	-0.452817	0.495966
Arl14	-0.00855693		0.0539433	0.999639	-1.28976		-0.665936		-0.398199
Arl14ep	0.0747224	0.999992	0.0967439	0.999639	0.457205	0.00735102	0.550916	0.0107955	-0.198942	0.74592
Arl14epl	0.000957168		0.0132841	0.999639	-0.399216		-0.165873		-0.512092
Arl15	-0.00270778	0.999992	-0.0691017	0.999639	0.0515287	0.867667	-0.0756918	0.807951	0.480584	0.39253
Arl16	-0.026561	0.999992	-0.1682	0.999639	0.159254	0.595054	-0.119829	0.704301	0.157288	0.862742
Arl2	-0.0343106	0.999992	0.0972421	0.999639	0.644059	0.0607754	0.768746	0.0135362	-0.00763668	0.993835
Arl2bp	-0.12201	0.999992	0.0489695	0.999639	0.23683	0.3267	0.263483	0.367368	0.142625	0.838225
Arl3	-0.030478		-0.102203	0.999639	1.23732	0.0137628	0.956524	0.0632486	-0.286274	0.823165
Arl4a	0.0867428	0.999992	0.095581	0.999639	0.0743298	0.809977	0.188459	0.585017	-0.282911	0.759785
Arl4c	-0.20893	0.999992	-0.0264212	0.999639	-0.398047	0.122467	-0.46682	0.155568	-0.124191	0.941598
Arl4d	-0.0668589		0.116442	0.999639	-0.994727	0.108748	-0.532363	0.39376	0.753145
Arl5a	0.0120235	0.999992	0.0888754	0.999639	0.546811	5.83665e-05	0.635892	0.0303598	0.0223176	0.981891
Arl5b	0.0163059	0.999992	0.0396322	0.999639	-0.195145	0.45925	-0.162907	0.588504	-0.0211884	0.979144
Arl5c	0.0369354	0.999992	0.0822758	0.999639	1.19683	2.53356e-18	1.2592	6.12994e-09	0.278534	0.746848
Arl6	-0.0413225		0.078028	0.999639	0.633858	0.273781	0.856678	0.0790115	-1.27405	0.0977203
Arl6ip1	-0.0677278	0.999992	0.0911249	0.999639	0.721422	9.87446e-09	0.815806	0.0107734	-0.246188	0.721522
Arl6ip4	-0.0540974	0.999992	-0.00672464	0.999639	1.04752	6.97659e-09	1.00539	1.30021e-06	0.12746	0.87457
Arl6ip5	-0.0926382	0.999992	-0.0244784	0.999639	-0.0132766	0.955178	-0.0796664	0.772383	-0.445203	0.567988
Arl6ip6	0.0130199	0.999992	-0.038632	0.999639	0.873467	4.07996e-05	0.785021	0.00228333	-0.0396272	0.959053
Arl8a	0.0386033	0.999992	0.146973	0.999639	-0.691796	0.000660158	-0.508172	0.014479	-0.215398	0.729309
Arl8b	-0.0397367	0.999992	0.00445299	0.999639	0.333822	0.0621524	0.308867	0.208091	-0.337767	0.616598
Arl9	0.000433366		0.0291745	0.999639	-0.193469	0.839364	0.0170208		-0.158567
Armc1	-0.0578688	0.999992	-0.00622288	0.999639	0.899842	1.90782e-09	0.844235	0.005899	-0.201532	0.798543
Armc10	-0.0232179	0.999992	-0.0787853	0.999639	0.570231	0.000509384	0.438997	0.080973	-0.00617542	0.993835
Armc12	0.00913396								0.00400082
Armc2	0.0454945	0.999992	-0.0441321	0.999639	-1.30383	0.0444538	-1.64437	0.0125368	-0.882395
Armc3	-0.0740804		0.15404	0.999639	-0.789322	0.272059	-0.0838829	0.918718	-0.422143
Armc4			0.00171422	0.999639	0.228199		0.250342		-0.280876
Armc5	-0.018226	0.999992	0.0062678	0.999639	-0.0456764	0.828099	-0.0691084	0.761461	0.0365621	0.961928
Armc6	0.00479103	0.999992	-0.21754	0.999639	1.33753	3.12544e-08	0.984203	0.000799114	-0.0895049	0.910563
Armc7	-0.175347	0.999992	-0.0286961	0.999639	-1.10701	5.83307e-06	-1.18273	3.13978e-05	0.138388	0.92264
Armc8	-0.00824191	0.999992	-0.010285	0.999639	-0.167533	0.325685	-0.21204	0.215608	0.0940653	0.905918
Armc9	0.0807186	0.999992	-0.00967218	0.999639	-1.70369	6.0635e-17	-1.72422	1.19644e-08	0.426135	0.672796
Armcx1	0.00888512		0.00602004	0.999639	1.15134	0.160909	1.09922		-0.0323737
Armcx2	-0.128343	0.999992	-0.0262438	0.999639	-0.132031	0.68666	-0.209496	0.493016	-0.468413	0.71658
Armcx3	0.102434	0.999992	0.0999139	0.999639	-0.887001	0.00131033	-0.73168	0.0173873	-0.522242	0.66765
Armcx5	0.000410329	0.999992	0.0398085	0.999639	-0.422928	0.15511	-0.388806	0.185902	-0.217005	0.819948
Armcx6	-0.0178134		-0.0635761	0.999639	-0.59066	0.410679	-0.994772	0.15893	-0.0767145
Arnt	-0.0166984	0.999992	0.0483096	0.999639	-0.617089	0.000598536	-0.574721	0.0165842	-0.115454	0.85056
Arnt2	0.00331413		0.00166819	0.999639	-0.324525		-0.391456		-0.754738
Arntl	0.0245997	0.999992	-0.0870084	0.999639	-0.1258	0.591273	-0.276935	0.430415	0.606686	0.417495
Arntl2	-0.00800606		0.00222284	0.999639	-0.105945		-0.0948264		-0.999152
Arpc1a	-0.0611254	0.999992	0.0185717	0.999639	0.516852	0.00223987	0.505404	0.00393283	-0.118071	0.86242
Arpc1b	-0.0455579	0.999992	-0.0241621	0.999639	0.191413	0.219115	0.134807	0.547257	0.0552823	0.937675
Arpc2	0.0266298	0.999992	0.138249	0.999639	-0.0408727	0.827883	0.117729	0.703891	-0.208797	0.729486
Arpc3	-0.0466759	0.999992	0.0450388	0.999639	0.609874	0.0023533	0.63533	0.0222754	0.042153	0.961928
Arpc4	-0.0686663	0.999992	0.0255176	0.999639	0.250067	0.115861	0.248277	0.177915	-0.00860995	0.990459
Arpc5	0.00688016	0.999992	0.0812937	0.999639	0.215305	0.138359	0.291248	0.301937	-0.334312	0.571267
Arpc5l	-0.0578485	0.999992	0.114494	0.999639	0.0483714	0.795769	0.156652	0.493954	-0.0637602	0.941264
Arpp19	-0.00430945	0.999992	0.000584139	0.999639	0.623993	1.08567e-05	0.588071	0.025505	-0.262907	0.68229
Arpp21	-0.0177203		-0.0121124	0.999639	2.11281	0.000398087	1.88672	0.00670524	0.623136
Arr3	0.028874		-0.0566199	0.999639	0.173081	0.856105	-0.435886		-0.460271
Arrb1	0.0309563	0.999992	0.199589	0.999639	-1.01158	3.8216e-08	-0.761399	6.84521e-05	-0.429774	0.549395
Arrb2	0.0246116	0.999992	0.0694983	0.999639	-0.552987	0.00204392	-0.500163	0.0381942	-0.117375	0.921632
Arrdc1	-0.0340951	0.999992	0.0842565	0.999639	-0.506756	0.000206362	-0.437313	0.0158185	-0.0527704	0.941264
Arrdc2	-0.0879348	0.999992	0.0585022	0.999639	-0.377335	0.126584	-0.329379	0.188512	0.302849	0.720077
Arrdc3	0.0514164	0.999992	-0.000836935	0.999639	-0.482638	0.081818	-0.514565	0.10915	-0.380136	0.600169
Arrdc4	-0.0104026	0.999992	0.0998233	0.999639	-1.27582	0.0702628	-0.780114	0.283128	0.406785	0.75603
Arrdc5	-0.000716828		0.0802626	0.999639	-0.737259		0.339581		-0.0126664
Arsa	-0.0288735	0.999992	0.201284	0.999639	-0.942034	4.63451e-05	-0.680233	0.0029247	0.158843	0.886546
Arsb	0.0253229	0.999992	-0.046377	0.999639	0.602485	0.00390125	0.510369	0.0146323	0.455103	0.701216
Arsg	-0.0527179	0.999992	0.20814	0.999639	-1.75966	4.50926e-07	-1.29335	0.000112863	0.0441286	0.973116
Arsi	0.0167378		0.428792	0.378142	0.88768	0.251402	1.9721	0.0150759	0.910677	0.344855
Arsj									-0.145029
Arsk	-0.0923799	0.999992	0.138083	0.999639	-0.304176	0.264838	-0.114774	0.742628	-0.267221	0.789682
Art1	-0.0108959		0.0873595	0.999639	-0.181581		0.670414		-0.0785355
Art2a-ps	0.0599308	0.999992	0.118386	0.999639	-1.62607	0.00338996	-1.15057	0.0218982	-0.110441	0.945434
Art2b	0.0288467		-0.119344	0.999639	0.361056	0.667274	-0.332323	0.727235	0.00099227
Art3	0.0176739		0.093541	0.999639	-0.47663	0.587564	0.259461	0.773159	0.0264353
Art4	0.138054	0.999992	0.0230447	0.999639	-0.168019	0.825892	-0.102405	0.894497	0.425973
Art5	0.0702298		0.00328354	0.999639	0.117276	0.893913	0.104437	0.913909	0.334272
Artn	0.0263704		0.00102441	0.999639	-0.0969567		-0.0877485		0.00567676
Arv1	0.0333087	0.999992	-0.0181436	0.999639	-0.455418	0.0934757	-0.518564	0.0993039	-0.0234339	0.98094
Arvcf	0.0948342	0.999992	-0.0571913	0.999639	2.88863	4.03305e-45	2.77798	5.45242e-36	1.10289	0.175858
Arx	0.0078276								-0.0564303
Arxes1									-0.102625
Arxes2	0.0289337		2.34015e-05	0.999837	0.960647		1.21243		0.0687759
As3mt	-0.0121407	0.999992	-0.096051	0.999639	-0.667889	0.0305472	-0.879876	0.0199587	-1.06331	0.239058
Asah1	-0.0383667	0.999992	0.106593	0.999639	-0.632881	0.00027892	-0.518297	0.0186871	-0.678708	0.332808
Asah2	-0.023265	0.999992	0.356399	0.999639	-1.84079	1.54802e-06	-0.98442	0.00821981	-0.302356	0.829076
Asap1	0.105129	0.999992	0.0224762	0.999639	-0.553754	0.000290782	-0.555279	0.00881231	0.881127	0.00895421
Asap2	0.0207332	0.999992	-0.0722825	0.999639	-0.739287	0.0085353	-0.896515	0.00300234	-0.22985	0.845375
Asap3	-0.0380286	0.999992	0.0562089	0.999639	-1.12341	0.0531977	-0.936332	0.103218	0.477825	0.697313
Asb1	-0.0905314	0.999992	0.0864264	0.999639	-0.171192	0.322715	-0.087777	0.722007	-0.0293903	0.97142
Asb10			-0.0282365	0.999639	0.683534		0.331664		0.310598
Asb11	0.00826378		0.0039789	0.999639	0.138478		0.164234		-0.0116255
Asb12
Asb13	0.0920223	0.999992	0.0277973	0.999639	-0.973255	1.74569e-05	-0.935097	0.00465954	-0.0305019	0.973795
Asb14	-0.0314546	0.999992	0.0109261	0.999639	-1.28991	0.0207089	-1.27235	0.0268614	-0.363357
Asb15	0.00766259		0.018656	0.999639	-0.0634654		0.218155		-0.111367
Asb16	-0.0120687				-0.461579		-0.422754		-0.0989991
Asb17	-0.0165216		0.0139419	0.999639	-0.566868		-0.395058		-0.0848926
Asb18			-0.00805661	0.999639	0.28738		0.24385		-0.102625
Asb2	-0.0367814	0.999992	0.00315135	0.999639	-1.45213	1.17904e-06	-1.45608	3.08684e-05	-0.748148
Asb3	0.0133079	0.999992	0.00947857	0.999639	-0.0100937	0.96676	-0.023032	0.93811	-0.319514	0.617862
Asb4	0.0144837		0.00236956	0.999639	0.289223		0.308003		-0.211143
Asb5	0.000740734		-0.0112071	0.999639	-0.172339		-0.34326		-0.160684
Asb6	0.0507506	0.999992	0.0837081	0.999639	0.266245	0.155989	0.335127	0.124388	0.161712	0.80078
Asb7	0.0575349	0.999992	-0.0622238	0.999639	0.127326	0.559026	0.0117095	0.968387	-0.179657	0.779267
Asb8	-0.0104913	0.999992	-0.137285	0.999639	0.277303	0.230027	0.0652184	0.811235	0.0686896	0.944413
Asb9	0.00994505								-0.159387
Ascc1	-0.083728	0.999992	-0.0065098	0.999639	0.619492	0.0541734	0.579172	0.0600784	-0.00847197	0.991065
Ascc2	0.0586836	0.999992	-0.0323051	0.999639	0.483988	0.0156147	0.396727	0.143328	0.47033	0.546293
Ascc3	0.0538746	0.999992	-0.00306201	0.999639	-0.624541	5.60339e-08	-0.66148	7.7971e-06	0.0473325	0.952627
Ascl1	-0.0135697		0.0183085	0.999639	-0.475666		-0.0604269		-0.159387
Ascl2	0.00830743								-0.221845
Ascl3	0.0225443		0.0249509	0.999639	-0.00259576		0.349716		0.0872196
Ascl4	-0.0110379		0.101496	0.999639	-0.073735	0.934628	0.431738	0.583801	-0.244907
Asf1a	0.0503121	0.999992	0.115261	0.999639	0.955895	2.07102e-06	1.11099	0.00280976	-0.452357	0.568545
Asf1b	0.0117798	0.999992	0.0172314	0.999639	3.01421	1.79715e-35	2.9158	2.32831e-17	0.114248	0.881233
Asgr1	0.0149077		0.0135707	0.999639			0.24385		-0.323414
Asgr2	-0.00797549		0.0139419	0.999639	-0.280203		0.00217195		-0.141594
Ash1l	0.125438	0.999992	-0.00753852	0.999639	-0.764279	3.79515e-09	-0.797417	0.000343125	0.0360769	0.971588
Ash2l	-0.0105896	0.999992	-0.0576617	0.999639	0.773256	1.3232e-05	0.667224	0.000337522	0.240549	0.68883
Asic1	0.0523382	0.999992	-0.206271	0.999639	0.0197625	0.973216	-0.580501	0.287541	0.105325	0.944413
Asic2	0.00830743		-0.0107874	0.999639	0.324002		0.231711		-0.0489607
Asic3	-0.0263504	0.999992	0.12309	0.999639	-0.592176	0.280728	-0.247946	0.642475	-0.374393	0.744722
Asic4	0.035361		-0.0168315	0.999639	-0.0783667		-0.295981		-0.289676
Asic5	0.0078276		0.00106322	0.999639	0.214265		0.231711		-0.211557
Asl	-0.057273	0.999992	-0.0558465	0.999639	-0.0805172	0.831108	-0.208968	0.54338	0.0992866	0.925241
Asna1	-0.0362278	0.999992	-0.00697478	0.999639	1.23749	6.67146e-08	1.18902	4.65485e-07	0.0908808	0.889532
Asns	-0.00233282	0.999992	0.233551	0.999639	2.22337	2.6784e-08	2.541	1.06049e-08	0.325875	0.794118
Asnsd1	-0.0486966	0.999992	0.111167	0.999639	0.503511	0.00282315	0.642892	0.0494332	-0.289989	0.597332
Aspa	0.118176	0.999992	0.0405972	0.999639	-0.40083	0.525707	-0.319322	0.600574	-0.149839	0.92727
Aspdh	0.0149077								-0.195358
Aspg	0.00741789		-0.0116625	0.999639	0.236952				-0.0171233
Asph	0.0564497	0.999992	0.186313	0.999639	-0.723073	0.0697483	-0.386308	0.31621	-1.55083	0.0303337
Asphd1	0.0332868		0.19904	0.999639	-0.210389	0.783673	0.513419	0.403991	-0.114493
Asphd2	0.0497532		-0.0146971	0.999639	0.277251				-0.225519
Aspm	-0.0109927	0.999992	-0.0426016	0.999639	2.67269	3.53205e-09	2.65814	1.70776e-10	-0.215217	0.742365
Aspn	0.0967335		-0.0591275	0.999639	2.30294	3.56289e-05	2.23318	2.86005e-05	-0.105274	0.941892
Asprv1	0.0155771		0.0367382	0.999639	-0.455713		0.0410255		0.203621	0.898578
Aspscr1	-0.0579742	0.999992	-0.0129727	0.999639	-0.0382784	0.863587	-0.0960327	0.709577	0.315673	0.565005
Asrgl1	0.0612253	0.999992	-0.135006	0.999639	1.19636	2.24838e-12	0.99467	4.63047e-07	0.21465	0.746823
Ass1	-0.0549079	0.999992	-0.0645022	0.999639	4.12106	1.64478e-60	3.97928	1.06195e-43	0.0510785	0.961928
Aste1	0.0846975	0.999992	0.0344668	0.999639	-0.274895	0.297408	-0.253736	0.38686	0.0179376	0.980012
Astl	-0.0308511	0.999992	0.125502	0.999639	-1.35605	0.00424279	-0.982222	0.0340724	-0.00158175
Astn1	-0.00756386		0.0587125	0.999639	-0.687133		-0.0411694		-0.377335
Astn2	0.00318157		0.0504447	0.999639	-0.741736	0.328915	-0.4844	0.52282	-0.422545
Asun	0.014535	0.999992	-0.0883984	0.999639	0.453705	0.00338924	0.312557	0.070769	-0.0909553	0.9015
Asxl1	0.0971727	0.999992	-0.0128567	0.999639	0.50524	1.5573e-05	0.4554	0.00186086	0.180902	0.825126
Asxl2	0.0134336	0.999992	-0.037757	0.999639	-0.0460327	0.759508	-0.123229	0.494587	0.273061	0.631674
[truncated: 19,673 more rows]

## Sheet: (B) C-KO_vs_C-WT
GeneSymbol	log2FoldChange	padj
Ptprs	0.985385	1.46711e-14
Tdrkh	0.737725	2.45361e-07
Ifi204	0.721208	1.13282e-06
Pogk	0.646187	9.24754e-05

## Sheet: (C) P-KO_vs_P-WT
GeneSymbol	log2FoldChange	padj
Neto2	1.00364	7.31178e-09
Tdrkh	0.794106	1.22151e-05

## Sheet: (D) P-WT_vs_C-WT
GeneSymbol	log2FoldChange	padj
Ptgr1	5.68016	1.80341e-51
Bcat1	5.67495	8.87212e-96
Tmem132e	5.54998	1.13453e-45
Nt5dc2	5.52197	3.84151e-55
Eps8l2	5.44878	2.85912e-24
Uchl1	4.98635	2.78361e-46
Fstl1	4.76412	2.16069e-29
Car12	4.59305	8.4131e-24
Nav2	4.52806	1.39145e-177
Gm5424	4.35298	2.09042e-59
Ltbp4	4.28208	1.80369e-41
Stac	4.17727	3.10602e-10
Ass1	4.12106	1.64478e-60
Ankrd13b	4.09329	2.21928e-37
Akap1	4.09265	8.77962e-48
Rag1	4.02459	6.4537e-17
Bag2	4.00854	1.92865e-25
Rag2	4.00193	1.19507e-23
Rbm24	3.97159	3.57989e-15
Pbk	3.91617	2.17111e-39
Hspa12b	3.88878	1.75355e-35
Nme4	3.87566	1.4312e-23
Enpep	3.84141	3.03681e-09
Camkv	3.82187	3.11221e-09
Nlgn2	3.80197	8.33681e-19
Steap3	3.80174	4.10917e-34
Cdca5	3.75374	1.83339e-50
Depdc1b	3.7209	2.9129e-26
Gfra1	3.71808	6.55856e-17
Shcbp1	3.70242	3.91192e-31
Shank2	3.67694	1.01703e-14
Olfml2b	3.67581	3.55265e-09
Sapcd2	3.66969	8.16898e-40
Slc16a1	3.62908	1.72222e-110
Pvrl2	3.61588	6.98044e-15
Ccdc85c	3.56485	8.59273e-15
Syndig1l	3.54477	2.21731e-09
Bub1	3.53851	2.86286e-52
Sertad4	3.51404	3.69664e-11
Ltf	3.50327	1.07933e-10
Fabp5	3.49993	5.4946e-20
Lrr1	3.49505	7.86144e-12
Aunip	3.47243	1.94533e-17
Ttk	3.45599	2.31253e-40
Cks1b	3.43958	3.088e-43
Evpl	3.43745	1.02584e-06
Rsph1	3.40612	4.78184e-10
Klhl23	3.36295	2.04009e-11
Alpl	3.34775	6.94755e-45
Tnfrsf19	3.33253	9.84002e-32
Uck2	3.32357	3.84066e-56
Igll1	3.32172	3.59412e-09
Cenpv	3.31588	3.00066e-24
Tpx2	3.31071	9.63592e-49
Nusap1	3.29089	1.07666e-47
Dnph1	3.27887	2.49096e-18
Gm595	3.27799	8.59632e-08
Elovl6	3.24369	2.71531e-53
Esco2	3.24007	5.95791e-43
Lrfn4	3.21642	1.32659e-11
Sox4	3.21623	2.49895e-76
Ccnf	3.2142	1.24057e-50
Bub1b	3.21288	6.30576e-47
Mis18bp1	3.20852	6.62046e-60
Ccnb1	3.19192	1.1801e-13
Ngp	3.19153	1.8665e-13
2900026A02Rik	3.18942	2.01002e-52
Dyrk3	3.18925	8.16084e-24
Anln	3.18629	2.45172e-57
Ccna2	3.17899	1.08376e-18
Dctpp1	3.15322	1.00219e-33
Spc24	3.15242	1.46743e-35
Chek1	3.14312	1.4739e-25
Cenpf	3.14109	3.09616e-20
Ccnb2	3.13762	2.17111e-39
Fam195a	3.12905	1.74657e-11
Cdk1	3.12761	2.53422e-13
Fut10	3.1132	9.14091e-08
Crnde	3.11304	2.07044e-07
Lrrn4	3.11234	5.86485e-15
Cdca8	3.10806	1.59119e-44
Dntt	3.09794	1.54651e-07
Thbd	3.08308	2.78399e-40
Ccnd1	3.07424	5.00152e-44
Kif14	3.07411	2.83169e-32
Kif2c	3.06772	2.56914e-11
Tcam1	3.05641	1.47e-11
C330027C09Rik	3.03459	4.88092e-53
Asf1b	3.01421	1.79715e-35
Exo1	3.00306	1.97647e-44
Enkd1	3.0024	2.21729e-19
Gtse1	2.99651	5.65352e-24
2610318N02Rik	2.9924	7.24356e-20
Cenpi	2.98864	2.40378e-32
Ctdspl	2.98739	2.60992e-07
E2f8	2.98714	7.47025e-13
Sgol1	2.98615	6.4458e-49
Mex3a	2.98321	2.69013e-41
Stmn1	2.9798	2.70748e-44
Rrm2	2.97897	3.22273e-43
Ube2c	2.96151	2.24633e-35
Rd3l	2.96075	5.21364e-05
BC030867	2.95632	8.95066e-21
2810417H13Rik	2.95219	1.34591e-44
Plxdc1	2.95136	5.02995e-15
Aurka	2.9511	1.361e-40
Pcdh9	2.94108	2.94366e-07
Igsf3	2.93354	1.33979e-05
Mcm10	2.92306	5.78154e-14
Zik1	2.92264	2.12951e-25
Kif18b	2.91787	3.91468e-12
Smyd2	2.90985	1.31388e-28
Uhrf1	2.90651	2.16811e-17
Gcat	2.9006	4.00996e-16
Cbx2	2.89696	2.15657e-35
Cdc45	2.89311	8.71751e-33
Pcdhgc3	2.88873	1.58819e-21
Arvcf	2.88863	4.03305e-45
Cdc6	2.88833	2.83357e-09
Gins1	2.88829	1.90969e-22
Kif20a	2.88108	1.20045e-39
Aurkb	2.87791	5.29065e-55
Ninl	2.86267	1.55919e-07
Espl1	2.86073	1.38663e-11
Kif11	2.85102	1.43404e-10
Cdkn2a	2.84839	5.70863e-05
Atg9b	2.84702	1.13287e-05
Galnt14	2.84608	3.48122e-14
Fam72a	2.84209	2.14536e-17
Kif4	2.84171	7.9889e-12
Epha2	2.83843	1.8003e-12
Pif1	2.83436	2.8151e-23
Birc5	2.82893	5.80275e-49
Gsto1	2.82284	6.54597e-31
Kif15	2.82023	1.28455e-53
Lamb2	2.82021	1.13442e-12
Cenph	2.81769	7.62562e-12
Cdc20	2.81485	1.80533e-34
S100a9	2.81323	7.66764e-15
Acot7	2.8106	8.16859e-14
Dctd	2.80829	2.02257e-26
Nuf2	2.80683	1.28812e-20
Ccne2	2.8015	1.41179e-23
Plk1	2.79992	2.04805e-41
Gmnn	2.79411	6.54597e-31
Rcor2	2.79033	2.52038e-21
Spc25	2.77771	2.10326e-28
Cdca7l	2.77413	1.0903e-39
Ckap2l	2.77235	4.04118e-12
Ncapg	2.76779	1.41422e-11
Ckap2	2.75913	1.11963e-21
Trip13	2.74962	1.09383e-23
Ncaph	2.74347	8.80335e-44
9330182L06Rik	2.73255	0.000135913
Cdca3	2.72512	2.67263e-08
Parpbp	2.72424	7.69907e-23
Kntc1	2.72371	5.57866e-39
Ercc6l	2.72264	2.10277e-48
Gins2	2.71485	1.28146e-15
Cdkn1a	2.71355	3.9728e-08
S100a8	2.7128	1.13221e-11
Depdc1a	2.71174	2.39066e-21
Ankle1	2.70718	2.02257e-26
Dlgap5	2.70093	1.35076e-34
Dtl	2.70016	7.11904e-32
Trim2	2.69824	7.39053e-21
Nr1d1	2.68837	2.01216e-15
Stil	2.68628	1.79018e-08
Nespas	2.68218	6.60732e-23
E130012A19Rik	2.67703	8.33809e-20
Tcf19	2.67698	2.29541e-26
Mybl2	2.6743	3.51951e-39
Aspm	2.67269	3.53205e-09
Akap12	2.67174	7.93053e-110
Tmem97	2.6627	1.61396e-36
Mnd1	2.66165	2.08898e-06
Ska1	2.66006	1.26647e-12
Prr11	2.65378	1.23285e-18
Col5a3	2.65304	1.59108e-16
Fam83d	2.6512	1.65537e-16
Serf1	2.64822	2.75589e-06
Cdca7	2.6469	8.77669e-73
Ncapg2	2.64432	1.8077e-32
Fignl1	2.6366	1.02138e-27
Ect2	2.63614	3.65689e-34
Prkar2b	2.61889	4.31768e-21
Sgol2a	2.61808	2.49885e-27
Nes	2.61675	4.287e-05
Thop1	2.61662	5.36327e-36
Bst1	2.61648	3.23169e-10
Zfp428	2.61408	6.30785e-12
Hells	2.61085	7.19563e-62
Fam64a	2.61063	2.45468e-16
Ticrr	2.60959	1.50096e-09
Mb21d1	2.60868	2.37518e-15
Kcnk1	2.60514	7.60303e-05
Casc5	2.60505	5.97834e-70
Psrc1	2.60153	1.77868e-13
Rad51	2.5966	1.30374e-25
Fzd9	2.59601	8.2566e-08
Tmem107	2.59388	4.73204e-08
Endog	2.59319	2.91689e-14
Psat1	2.58783	2.07139e-44
Abhd14a	2.57635	2.22603e-17
Pask	2.56725	5.70823e-23
Islr2	2.567	1.25519e-15
Gas2l3	2.55698	2.14006e-25
Srm	2.5564	1.65788e-50
Ddias	2.54608	1.13235e-19
Slc35f2	2.54526	5.27208e-17
Cdkn2c	2.54177	7.77523e-26
Lmna	2.53991	1.96721e-12
Hist1h2ah	2.52691	4.25355e-12
Top2a	2.52562	7.78683e-09
Ppa1	2.52485	8.44542e-29
Ncs1	2.52419	4.59771e-08
Cplx2	2.52127	1.28806e-81
Recql4	2.51247	1.15173e-26
Tspan6	2.50965	7.14268e-05
Timm8a1	2.50911	5.19304e-37
Fancd2	2.50875	1.03408e-07
Tfdp1	2.50582	8.28196e-40
Wnk2	2.50027	4.07937e-07
Lgals1	2.49511	1.34994e-18
Spag5	2.49151	4.5647e-07
Kif22	2.48913	6.85789e-34
2010204K13Rik	2.48609	1.80457e-07
Knstrn	2.48551	1.03731e-22
Cks2	2.48048	2.65474e-18
Vpreb1	2.47583	0.000266614
Lgr5	2.47141	1.59143e-23
Lonrf3	2.47095	0.000151904
Crmp1	2.46771	4.56527e-05
Clspn	2.46544	5.8488e-12
Cenpn	2.46272	2.56712e-12
Cep55	2.46257	5.07869e-08
Pinlyp	2.46042	0.000534266
Lcn2	2.45961	0.000129602
Tmem41a	2.4595	2.67131e-10
Cth	2.4556	0.000186334
Gfod1	2.45427	3.10786e-51
Stc2	2.45255	0.00086109
Cenpe	2.45188	4.0688e-12
Brip1	2.45015	2.38557e-29
Sorcs2	2.45001	4.04866e-29
Myb	2.43916	4.09406e-43
Pcdhgc4	2.43761	5.05252e-09
Slc29a1	2.43355	4.94195e-48
Sox12	2.43196	5.08778e-18
C1ql1	2.42737	0.00100051
Nek2	2.42549	1.87353e-06
Trim16	2.42507	1.64961e-12
Mei4	2.42331	2.67724e-10
Rtkn2	2.42121	4.71565e-16
Slc1a4	2.41683	3.30866e-10
Lig1	2.41677	2.93792e-41
Cenpm	2.41518	1.8983e-15
Impa2	2.40588	7.66551e-19
Ddn	2.39025	0.000234655
Ube2t	2.38954	1.17779e-11
Rasl10a	2.38728	1.84827e-05
Ptprs	2.38465	8.5523e-56
9430020K01Rik	2.38169	6.89776e-17
Nudcd2	2.38081	1.3288e-36
Zwilch	2.37243	7.12061e-16
Fhod3	2.36801	3.42292e-07
Selenbp1	2.36205	1.03008e-10
Rad51ap1	2.35928	4.08618e-25
Cdca2	2.35388	4.30416e-10
Troap	2.3517	1.52486e-10
Smc2	2.34998	1.08152e-44
Fmn2	2.34229	8.61647e-12
E2f7	2.34	1.50712e-19
Hist1h1b	2.33893	7.04448e-08
Srl	2.33329	3.93659e-11
Myl4	2.33136	9.05335e-12
Cdkn2b	2.33006	0.000160286
Fbxo5	2.32929	2.15657e-35
Gal3st1	2.31877	0.00113044
Kif7	2.3185	0.000469035
Shmt1	2.31606	3.75675e-46
Ncapd2	2.31292	1.4847e-41
Oaf	2.30306	1.40185e-05
Aspn	2.30294	3.56289e-05
Prim1	2.29956	3.6625e-29
Cdc25c	2.29856	4.16523e-10
Chaf1a	2.29054	2.12724e-47
Bahcc1	2.28899	3.22188e-05
Hist3h2ba	2.28899	4.13538e-10
Wee1	2.28261	1.13854e-32
S100a6	2.27924	5.21576e-14
Mcm6	2.27624	1.70759e-71
Dhfr	2.27507	4.18533e-23
Chtf18	2.26984	2.13425e-26
Sord	2.26832	2.67826e-23
Dab2ip	2.26693	4.96858e-26
Gm6222	2.26568	0.000223418
Diras2	2.2641	1.64316e-49
Slc34a1	2.26347	7.38032e-05
Gcsh	2.26034	1.81739e-21
Foxm1	2.25416	2.54469e-31
Rad54l	2.25385	3.07055e-31
Padi4	2.24763	1.36067e-06
Cenpk	2.24673	2.88797e-13
Snrpf	2.24639	3.46639e-11
Zfp521	2.24599	3.39277e-05
Pard6g	2.24464	2.22733e-11
Siah1b	2.2438	1.60422e-08
Zfp105	2.24207	0.000175188
Oip5	2.24117	2.50759e-12
Gfi1b	2.23942	0.00140769
Traip	2.23929	1.68535e-18
Ska3	2.23882	5.9985e-21
C230035I16Rik	2.23238	0.000942919
Hist1h3g	2.2319	3.95797e-06
Bdh1	2.22857	7.12061e-16
Asns	2.22337	2.6784e-08
Gpsm2	2.21965	5.86793e-16
Tmem98	2.21226	0.00225031
Acvr2b	2.21184	0.000114141
Rcc1	2.21043	6.03081e-41
Ppp1r13l	2.20863	0.00109872
Mxd3	2.20562	2.98811e-15
Kif23	2.20444	1.34491e-09
Gen1	2.20415	1.68562e-23
Tyms-ps	2.20308	1.90394e-05
Pdlim1	2.19774	1.17456e-37
Lhpp	2.1977	2.97421e-07
Chchd10	2.19707	1.00039e-30
Prc1	2.19338	1.19942e-21
Pold2	2.18875	6.53583e-27
Sh2d5	2.18872	0.000385685
Nanos3	2.18826	0.00463839
Pipox	2.18736	2.83386e-07
Mad2l1	2.1866	7.09038e-35
Galk1	2.18456	9.00063e-21
Cit	2.18216	1.13673e-16
Kbtbd6	2.17848	7.81502e-09
Tbc1d2	2.17825	4.36516e-12
Racgap1	2.17638	7.29961e-39
Chchd6	2.17606	3.0138e-05
Gstm5	2.17581	0.00490982
1110032F04Rik	2.1755	0.0041928
Kis2	2.17401	3.27679e-06
Cdkn1c	2.16534	0.000258474
Eme1	2.16341	3.87902e-16
Adk	2.16237	8.26032e-23
Rps27l	2.1614	7.34512e-18
Gpam	2.16049	4.06899e-47
Spire1	2.15591	2.8639e-13
Dusp9	2.15226	0.00328166
Mthfd2	2.15152	6.20669e-24
Hmmr	2.1467	5.3395e-09
Hist1h2bp	2.1451	7.58394e-09
Myc	2.14479	2.14987e-35
Tipin	2.14429	3.74892e-18
Zfp704	2.14247	3.50476e-12
Nsl1	2.14227	1.69196e-28
Npm3-ps1	2.14168	1.94076e-06
Angptl4	2.14032	4.03699e-08
Ndufb6	2.14015	2.07247e-12
Mtfr2	2.13551	6.18066e-12
Rrm1	2.13383	1.962e-28
Rpp25	2.1335	0.00474466
Ung	2.13344	2.32822e-20
Hist1h2bl	2.13137	3.34129e-14
Mt1	2.13061	6.45434e-06
Padi3	2.12951	5.20935e-06
Ctxn1	2.12889	0.00291997
Camp	2.12714	0.000143081
Gm6682	2.12699	5.47802e-09
Bard1	2.1239	4.20512e-31
Ybx3	2.12346	6.82207e-44
Polq	2.12217	6.48368e-34
Arpp21	2.11281	0.000398087
Ehd2	2.11173	7.02304e-32
Capsl	2.10363	0.00208923
Tiam1	2.1015	8.09514e-15
Snrpd1	2.10149	2.89475e-19
Iqgap3	2.09869	2.11573e-17
Mcf2l	2.09808	2.99041e-05
Nhp2	2.09612	7.87832e-23
Rad54b	2.09575	1.05261e-18
Trhr2	2.09572	0.00700027
Ccdc34	2.09046	4.69845e-14
4930503E24Rik	2.08937	0.000127502
Pmm1	2.08857	4.94378e-16
Pcsk4	2.07795	2.3708e-08
Igsf8	2.0772	5.56379e-35
Incenp	2.0755	7.3539e-22
Ctps	2.07454	9.04669e-44
C1qbp	2.07449	2.21151e-33
Nolc1	2.07391	2.78399e-40
Wfdc21	2.07378	2.8516e-05
Ydjc	2.07058	3.30253e-26
Pxylp1	2.07013	5.42279e-06
4930579G24Rik	2.06961	5.90497e-17
Ece2	2.06768	2.51952e-16
Amdhd1	2.06502	0.0056401
Sema3g	2.06366	2.82072e-07
Nmral1	2.06288	5.15934e-24
Ccdc57	2.06169	4.69766e-07
Brca1	2.05935	5.2646e-24
Pole3	2.05688	6.33498e-10
Mtfp1	2.05583	5.64964e-07
Chst7	2.0539	5.77359e-10
Tacc3	2.05107	2.01432e-27
Grip1	2.05072	0.000775742
1110038B12Rik	2.0425	1.80019e-22
Fam50b	2.03959	0.0044854
Timm50	2.03953	2.09229e-22
Chchd4	2.03757	5.68624e-20
Pole	2.03458	2.61124e-20
Trim37	2.03447	3.50602e-38
Hist1h4n	2.03352	0.00296126
6030408B16Rik	2.032	0.00020812
Mcm2	2.03051	4.10536e-29
Usmg5	2.02854	4.37866e-10
Xkr5	2.02737	9.6329e-05
Gsg2	2.02715	1.05692e-30
Lmnb1	2.02645	6.06537e-33
Luzp1	2.02625	1.52254e-25
Tjp2	2.02457	1.31306e-11
Kif18a	2.0236	8.3741e-27
Rpa3	2.01876	2.63998e-16
Ruvbl1	2.0174	7.42404e-23
Ndc80	2.01188	4.30684e-20
Mrpl34	2.01112	3.73108e-21
Lmnb2	2.00891	4.71923e-40
Mastl	2.00883	1.44841e-11
Lsm5	2.00648	4.74466e-09
Kpna2	2.00202	2.85289e-22
Lap3	2.00088	3.16178e-18
Mthfd1	1.99995	1.62227e-34
Hdgf	1.9998	1.78611e-60
Xylb	1.99788	1.3751e-06
Spef1	1.99657	2.55006e-07
Palm	1.9938	2.53349e-18
Ppp1r14b	1.99024	4.01876e-31
Usp44	1.98991	0.000118738
Slc7a5	1.98944	1.04772e-24
3110082I17Rik	1.9856	3.41366e-09
Paqr4	1.9846	2.43302e-07
Hist1h3d	1.98399	3.11049e-16
Csrp2	1.98298	7.49354e-10
Ogn	1.98221	1.24056e-06
Prps1	1.98132	8.10876e-31
Lgalsl	1.9813	4.27941e-10
Smoc1	1.97572	0.000148002
Slc43a3	1.97512	2.16482e-14
Bzw2	1.97422	8.60047e-33
Mcm3	1.97039	1.82276e-30
Heyl	1.96917	0.00424693
H2afx	1.96779	6.65789e-20
Celsr2	1.963	1.95448e-11
Ren2	1.95452	0.0113334
Ahcy	1.95206	4.21676e-30
Gpr150	1.95148	0.011495
Hist1h3b	1.9514	0.000278372
Mcm5	1.94615	6.65925e-21
Arhgdig	1.94604	0.00779064
Hist1h4b	1.9448	4.77789e-11
Adarb1	1.94411	2.38014e-15
Thyn1	1.94311	2.07579e-06
Otub2	1.94283	1.82953e-39
Melk	1.94265	2.89323e-08
Sap30	1.94196	2.15054e-18
Tpi1	1.94099	1.15927e-20
Hist1h2af	1.94062	6.78531e-10
Hist1h2ae	1.94043	6.68906e-11
Sestd1	1.938	0.00177496
Lyar	1.93233	1.44836e-21
Awat2	1.93148	0.00802373
Tifa	1.92561	4.61672e-37
Diap3	1.9248	2.33961e-15
Aqp1	1.92471	0.00161337
Sfxn1	1.9239	1.70225e-32
Rem2	1.92087	0.00187617
Mcm7	1.91868	4.36455e-30
Ipo5	1.91401	8.59725e-45
Arhgap19	1.91256	3.80246e-19
Nudt4	1.91165	2.83291e-43
Lipt2	1.9101	1.19112e-05
Hmga1	1.90957	6.79214e-44
Slc19a1	1.90769	6.48406e-28
Hist3h2bb-ps	1.90516	0.000908884
Pus7	1.90464	8.49261e-37
Rangrf	1.90313	8.58015e-12
Psmc3ip	1.89917	1.01377e-09
Tfrc	1.89915	4.55649e-71
Hspa2	1.89883	1.8375e-13
Ryk	1.89689	2.44472e-05
Erh	1.89572	1.26006e-24
Smco4	1.89201	3.08939e-08
Spdl1	1.89148	4.03928e-18
Cenpp	1.88953	3.57958e-09
Insm1	1.88756	0.00576388
Ap1s1	1.88721	4.69645e-11
Gemin6	1.88487	1.09573e-12
Pole2	1.88126	6.75505e-12
Rfc4	1.8805	1.63645e-20
Dbf4	1.87914	1.01724e-22
Umps	1.87636	7.4549e-33
Mki67	1.87567	0.000114904
Orc6	1.87545	7.89368e-17
Ezh2	1.87416	3.96174e-36
Ppat	1.87144	1.87218e-35
Phgdh	1.86975	3.09546e-24
Agpat5	1.86912	3.29342e-24
Gm5124	1.86599	0.0010894
Efna4	1.86585	0.0169835
Ndufs6	1.86577	7.16067e-12
Cldn4	1.86516	0.0174999
Hist1h3h	1.86479	2.72248e-09
Dio2	1.86352	0.0146279
Ranbp1	1.86115	1.94422e-17
Hspd1	1.86078	7.65307e-31
Dbi	1.85983	1.38373e-10
Shmt2	1.85884	9.73952e-37
Fads1	1.85653	5.35594e-10
Ndufc1	1.85614	1.22885e-07
Mns1	1.85526	2.58543e-07
Atad5	1.85299	5.78421e-26
Rrp1b	1.85285	9.67686e-43
Mcm4	1.85242	1.10084e-27
Tfap4	1.85074	3.34386e-17
Blm	1.84903	3.12783e-16
Dut	1.84792	3.87676e-24
Atp10a	1.84317	5.99752e-12
Il33	1.84135	0.0138615
Idh3a	1.84085	4.61466e-20
Tubb2b	1.84006	2.94142e-10
Hist1h4a	1.83993	5.36141e-09
Siva1	1.83928	2.0265e-10
Ppp1r26	1.83777	0.000162313
Mpo	1.83769	0.0189244
Bambi	1.8369	0.000338478
Eid2	1.83684	0.00956643
Cbx5	1.83369	9.30034e-74
Hist1h2bh	1.83094	2.88928e-05
Ptk2	1.82929	8.64571e-21
H19	1.82442	0.0203825
Car1	1.82356	0.0170647
Kifc5b	1.82208	2.50249e-14
Coq7	1.81946	4.68979e-10
Garem	1.81798	0.0207936
Mif	1.81508	2.97513e-15
Lsm2	1.81392	2.81465e-16
Tmem238	1.81361	6.53728e-10
Phpt1	1.81102	2.12149e-08
Hist1h2bk	1.80963	3.67456e-11
Mrps36	1.80953	2.6744e-08
Snord19	1.80533	0.00487742
Banf1	1.8051	1.19838e-18
Idh2	1.80434	1.20387e-20
Pla2g4c	1.804	0.000811168
Poc1a	1.80383	1.90352e-08
Cdc42ep3	1.80149	1.6048e-13
Pafah1b3	1.80073	2.77436e-18
Ide	1.79962	1.22964e-34
Prim2	1.79669	7.18173e-15
Pfdn6	1.79614	1.07569e-17
Mir19a	1.79361	0.0147207
Cox5a	1.78649	6.3259e-17
Magoh	1.786	2.1891e-11
Bok	1.78596	0.00708998
Ruvbl2	1.78483	6.36531e-26
Nat8l	1.78409	1.55844e-06
Hist1h2ag	1.78382	1.97278e-06
Phlda3	1.77929	0.00402555
Hk2	1.77494	7.87378e-22
Nop16	1.77419	1.02138e-27
Bbc3	1.77335	4.83852e-08
Hirip3	1.77275	4.61306e-26
Prodh	1.76095	2.70552e-10
Prkar2a	1.76002	2.07844e-24
Ska2	1.7573	4.8814e-19
Ccdc124	1.75632	1.15136e-11
Pxmp2	1.753	0.00300801
Tyms	1.75233	1.57367e-23
Tomm5	1.75179	1.79408e-26
Clns1a	1.75172	5.11366e-22
Park7	1.74854	2.92085e-19
Zfp41	1.74745	1.6087e-14
Atic	1.74683	3.54113e-38
Prmt5	1.74603	6.94121e-32
Cd320	1.74589	9.27522e-08
Hist1h2ab	1.74311	0.000217893
Rcl1	1.74286	8.93882e-18
Dhcr24	1.742	3.00069e-21
Fkbp4	1.73709	1.29674e-19
Hist1h2bm	1.73426	0.000132764
1700037H04Rik	1.73376	1.55084e-13
Pcdhgc5	1.73133	0.00158067
Hist2h4	1.73109	5.53535e-13
Nup37	1.73093	5.03829e-10
Gm5803	1.73003	9.9649e-06
Anp32e	1.72925	1.46949e-38
Fam136a	1.72773	2.14587e-21
Eif1ax	1.72579	1.50737e-17
Gart	1.72312	2.44555e-31
Bsn	1.72141	1.64506e-18
Cby1	1.72063	1.02268e-06
Ndufa12	1.72026	5.24469e-15
Tal1	1.71834	0.0149167
Prdx6	1.71737	1.37056e-18
Usp51	1.71678	0.026392
Thg1l	1.71614	2.03302e-12
Txn1	1.71608	1.45442e-11
Tnni2	1.71391	9.40866e-05
Nasp	1.71381	4.35052e-29
Pmf1	1.7122	3.38101e-14
Elof1	1.71138	1.37675e-19
Nutf2	1.71127	9.61107e-23
Cecr2	1.71116	2.46459e-19
Fen1	1.71069	7.57419e-07
Chaf1b	1.71056	1.11389e-12
Cacybp	1.70908	2.8612e-26
Dpy30	1.70878	7.68322e-13
Col25a1	1.70765	0.0310826
Kif20b	1.70524	1.62277e-33
Haus4	1.70388	5.80363e-20
Hist1h4j	1.70345	1.88315e-09
Mrpl12	1.70276	8.23097e-05
Cdc25a	1.701	7.76131e-26
Mrto4	1.70088	1.44012e-22
Lrfn1	1.70015	0.00894319
Xrcc6	1.70012	1.92866e-23
Ola1	1.69941	2.64922e-25
Sox8	1.68777	0.0292276
Eif4ebp1	1.68564	3.68444e-11
Hist1h2an	1.6814	4.21742e-06
Pola1	1.68129	4.97303e-21
Nacc2	1.68113	1.31018e-09
Ccdc183	1.67557	0.0348586
Vegfa	1.67542	2.15648e-07
Rpf2	1.67541	1.06887e-12
Rpp30	1.6745	6.75708e-07
Lancl2	1.67418	2.13439e-15
Snord52	1.6737	0.00510374
Snhg3	1.67364	5.20604e-07
Glrx5	1.67052	5.82122e-09
Acacb	1.6695	0.00336084
Gpx7	1.66938	0.0188037
Psmg3	1.66819	1.37297e-11
Hist1h3i	1.66804	1.21907e-07
Ndufa8	1.66802	2.65959e-10
Mir18	1.66551	0.0156147
Fbl	1.66476	2.8376e-18
Magi1	1.66424	0.0107722
Metrn	1.66349	1.539e-12
Hist1h2ak	1.66145	9.00175e-12
Syce2	1.66076	3.23193e-05
Ngfrap1	1.66062	1.73107e-07
Eef1e1	1.65897	6.44149e-14
Fam53b	1.65894	1.46683e-54
Mgst1	1.65827	0.000157003
Cuedc1	1.65751	8.06498e-06
Mrpl36	1.65732	1.18393e-16
Rrs1	1.65709	5.78154e-14
Paics	1.65235	8.03466e-23
Dmrta2	1.65091	0.029162
1110004E09Rik	1.65019	2.48375e-05
Ppil1	1.64973	6.26916e-30
Fancd2os	1.64728	0.0265229
Alms1	1.64473	7.28857e-34
Cldn10	1.64451	0.000254939
B430212C06Rik	1.64376	0.00108467
AI854703	1.64311	0.0100372
Zfp114	1.64273	0.0308324
Npr3	1.64089	0.0391928
Slc25a13	1.64037	6.34922e-06
Got2	1.63901	6.45082e-21
Uchl5	1.63871	3.20544e-15
Snrpa1	1.63844	5.03998e-17
Prss57	1.63656	0.038454
Nifk	1.63644	1.03731e-18
Hmgn5	1.63589	0.000261239
Hist1h2bj	1.63571	0.000307823
Kbtbd12	1.63411	0.012238
Ptpru	1.63372	0.0376515
Tifab	1.63365	1.32906e-07
Polr2f	1.63294	5.87064e-11
Slco4a1	1.62951	7.25169e-10
Tsacc	1.6275	0.00461779
Atad2	1.62734	9.55413e-41
Exosc6	1.62479	1.42639e-18
Nudc	1.62415	2.98647e-22
Tmem205	1.62303	0.0293658
Arhgap11a	1.62192	7.66339e-30
E2f2	1.62019	1.93198e-46
Rad51b	1.61798	2.87107e-07
Ifrd2	1.61756	1.75657e-31
Pno1	1.61734	7.73241e-12
Chchd1	1.61699	2.40028e-12
Pgk1	1.61565	3.25911e-20
Alyref	1.61518	4.08157e-15
Mrpl2	1.61465	1.16783e-12
Pfas	1.61405	3.51662e-36
Setd8	1.61373	3.31714e-29
Cmc2	1.61159	4.25814e-08
Nedd4	1.6115	5.99414e-52
Gm5088	1.60838	2.79488e-14
Got1	1.60751	1.33404e-22
Cdkn3	1.60605	7.90677e-07
Naa38	1.60506	1.11449e-06
AI427809	1.60445	0.0073629
Sephs2	1.60204	8.8331e-17
Mxi1	1.60195	1.62948e-15
Fam162a	1.60125	1.10438e-09
Snrpc	1.60019	2.70007e-09
Tmem100	1.59928	0.0156799
Ttll12	1.59755	2.16423e-16
Pfdn4	1.59671	1.74124e-07
0610009B22Rik	1.59618	0.000779858
B230118H07Rik	1.59428	0.0166151
Suv39h1	1.59165	2.60743e-33
Gpr12	1.59138	0.0466701
Dleu7	1.58697	0.0445436
Rai14	1.58645	0.0197351
Hist1h1a	1.58054	4.54159e-05
Ctnnbip1	1.5757	0.00256604
Apoo	1.57548	8.82986e-05
Mrpl50	1.57493	2.65515e-17
Sf3b5	1.5709	1.89025e-13
Atox1	1.56933	4.5428e-06
Spata7	1.5691	0.00050454
Rabl2	1.5663	0.00177763
Plk4	1.56535	9.67586e-22
Plscr3	1.56517	1.99692e-11
Lrrc59	1.56347	1.34597e-31
Deptor	1.56019	2.66899e-09
Bola1	1.55957	1.1449e-06
Tufm	1.55585	3.75228e-22
Tma16	1.55561	1.05773e-07
Socs2	1.55513	0.00112408
Fanci	1.55341	9.15311e-17
Ndufs5	1.55256	0.000139055
Hist1h4k	1.552	0.00112548
Ube2s	1.552	2.45852e-23
Ncapd3	1.55074	1.57583e-21
Usp1	1.55059	1.83328e-25
Lsm7	1.54977	8.57225e-11
Naf1	1.54967	6.8804e-12
Tuba1c	1.54874	7.89462e-09
Nup62	1.54842	2.28239e-20
Timeless	1.54357	7.3045e-11
Dkc1	1.54315	1.92989e-29
Hmgn2	1.543	1.28579e-15
2010107E04Rik	1.53824	2.9161e-09
Hprt	1.53727	4.76048e-18
E2f6	1.53676	1.77873e-12
Slmo2	1.53559	8.86445e-13
Eps8	1.53555	7.47151e-09
Nefh	1.53507	9.13636e-05
Swi5	1.53464	2.01393e-12
Naip1	1.53438	0.0134209
Sae1	1.5338	1.33404e-22
Snrpa	1.53375	1.28487e-15
Cfdp1	1.53285	1.48929e-09
Cad	1.53229	4.73821e-47
Aimp2	1.53177	7.48522e-12
Phb	1.53069	8.16521e-12
Acy1	1.52938	2.79781e-12
Eif2b1	1.52888	6.11238e-14
Ypel2	1.52859	3.468e-17
Mrpl18	1.52789	5.62839e-17
Lysmd2	1.52743	0.000831932
Tubg1	1.52676	1.05062e-09
Ccdc18	1.52659	3.92195e-07
Pdxp	1.52648	5.22335e-17
Cd3eap	1.52516	1.96693e-09
2810025M15Rik	1.52376	1.49134e-05
Ccbl2	1.52189	5.74019e-07
Kars	1.52181	4.39574e-20
Sdf2l1	1.52111	1.21914e-10
Atp5g1	1.52067	2.32344e-11
Ndufc2	1.51964	1.50256e-11
Zfp184	1.51943	0.00440759
Zfpm1	1.5181	4.8017e-14
Uqcrq	1.51787	9.61901e-07
Hist1h3c	1.51746	0.00176862
Strap	1.51637	7.43409e-19
Sod1	1.51545	1.69965e-07
Gfi1	1.51518	3.13996e-09
Rapgefl1	1.51476	9.73441e-08
Mir1949	1.51417	5.36805e-12
Rbbp7	1.51345	5.12719e-19
Egfl6	1.51328	0.000462888
Wdhd1	1.51238	1.13129e-23
Atpif1	1.51026	1.2338e-09
Crls1	1.50939	2.51863e-11
Cpne2	1.50582	0.0211486
Rsl1d1	1.50486	6.10017e-25
Nxt1	1.50484	8.52527e-12
Pa2g4	1.50444	2.08412e-28
Fgf11	1.50369	0.0189846
Phf5a	1.50367	1.63878e-16
Pigyl	1.50308	0.000329425
Grwd1	1.50234	2.57759e-19
Siglec15	1.50185	0.0137893
Mis18a	1.50163	9.08168e-11
l7Rn6	1.50139	4.16313e-07
Tmem255a	1.50117	3.48203e-06
Zfp647	1.5007	0.000122117
Nop58	1.49968	1.4993e-20
Ldha	1.49946	8.65025e-25
Zcchc3	1.49924	3.23873e-06
Timm13	1.49708	5.6524e-18
Abcb6	1.49674	3.17796e-10
Psmb5	1.49672	3.2096e-15
Tada2a	1.49528	2.49754e-08
Pter	1.49522	0.021436
Mbnl3	1.49445	1.33658e-29
Dgcr6	1.49084	6.04309e-08
Mzt2	1.48944	0.000120421
Gyk	1.48915	4.65157e-07
Nfix	1.48914	6.02425e-06
Rnf113a1	1.48909	0.00136507
Nop2	1.48869	6.23143e-29
Arhgef39	1.48815	8.18268e-06
Ndufaf2	1.48739	0.00198703
Acad8	1.48448	1.01667e-05
L2hgdh	1.48381	7.28717e-08
Zmynd19	1.48242	1.19162e-12
Tmprss3	1.48171	0.0297473
Wdr62	1.48121	6.30397e-09
E2f1	1.47827	3.28612e-10
Srd5a1	1.47793	0.00158642
Mtx2	1.47682	8.49516e-12
Pus1	1.47658	1.41824e-19
Ppan	1.47549	3.28872e-30
Lsm3	1.47491	1.62175e-10
Exosc7	1.47485	2.84971e-12
Psmd7	1.47336	3.8006e-15
Gadd45gip1	1.47257	7.60669e-18
Arhgap29	1.47215	0.000822886
Hist2h3c2	1.47117	1.11687e-07
Dcakd	1.47109	1.23776e-10
Polr2d	1.4708	2.06936e-11
Rundc3a	1.47066	0.0042241
Dancr	1.47054	1.87353e-06
2410016O06Rik	1.46955	1.46258e-20
Atp5k	1.46916	8.28971e-10
Impdh2	1.46889	5.2215e-20
Slc25a39	1.46715	4.24664e-15
Wdr12	1.46663	3.76777e-22
Plcb4	1.46527	0.0109648
Tagln2	1.46495	6.68126e-27
Pidd1	1.46445	1.17948e-14
Npm3	1.46375	7.21852e-15
Skp2	1.46361	2.15054e-18
Hist1h2ai	1.4631	2.51689e-08
Sephs1	1.46286	1.06421e-19
Rnf26	1.46123	1.18427e-18
Mrps5	1.45861	1.24458e-08
Nsun2	1.45761	3.7533e-30
Atp5j	1.45681	5.77139e-12
Polr2j	1.45041	1.02005e-09
Pcna	1.45012	5.8427e-13
BC055324	1.44973	1.33596e-11
Calr3	1.44946	0.0148006
Rsph9	1.44902	0.00285783
Thoc6	1.44901	3.82583e-13
Cbx3	1.44872	4.62535e-20
Gpt2	1.44738	5.51984e-05
Ubl4	1.44542	3.14733e-09
Mrpl23	1.44468	4.25761e-13
Hist2h3b	1.44351	4.53909e-06
Mms22l	1.4431	4.41184e-20
Rnaseh2a	1.44079	1.01875e-13
Mrps12	1.44	4.14286e-11
Ppp1r2-ps3	1.43982	0.00967605
Kcnn4	1.43915	1.90074e-16
Dkkl1	1.43841	0.0183429
Ptges3	1.4384	2.96322e-16
Gemin4	1.43711	9.59098e-06
Cdk4	1.43527	3.35237e-18
Nop10	1.43427	2.57933e-10
Gnl3	1.43355	1.86296e-29
Zkscan16	1.43346	0.000263806
Pemt	1.43298	0.0334716
Uqcr11	1.43226	1.30282e-13
Sac3d1	1.43174	8.71846e-11
Gins3	1.43145	5.06786e-11
Nob1	1.43106	3.34809e-13
Gars	1.42951	1.32739e-28
Cep76	1.4294	2.88354e-11
Rqcd1	1.42933	2.2482e-21
Hist1h2bf	1.42927	7.74109e-10
Gtf3a	1.42718	9.14521e-14
Lig4	1.42691	8.01838e-17
Samd1	1.42687	4.58843e-15
Tkt	1.42327	5.609e-17
Mfge8	1.42206	4.17769e-09
Wdr34	1.42181	3.96239e-11
Stox2	1.41854	0.00332005
Nucks1	1.4171	1.9443e-23
Hist1h4i	1.41678	1.48154e-08
Eif1a	1.41675	3.25783e-17
Dek	1.41557	4.898e-31
Slc25a4	1.41452	2.60808e-13
Whsc1	1.41433	4.78162e-30
Gm561	1.41358	0.00822389
Apex1	1.41244	2.74894e-08
Gm6525	1.41208	0.0131825
Neil3	1.41091	3.51368e-13
Smarcc1	1.41066	3.65148e-40
Gm12070	1.40962	1.37891e-06
Rtn4rl1	1.40923	0.0085574
Hes6	1.40902	3.62803e-18
Rcn1	1.40781	2.2868e-07
Rnmtl1	1.40755	3.32666e-10
Ndufaf4	1.40673	2.28416e-08
Ndufb5	1.4058	7.79379e-12
Gale	1.40497	4.81618e-10
Sptssa	1.40408	6.95053e-12
Dnmt1	1.4037	1.12921e-26
Gm17296	1.40256	5.16303e-21
Nxn	1.40245	9.73441e-08
Rangap1	1.40102	1.04223e-26
Ncbp2	1.40021	2.94692e-13
Wdr46	1.39996	1.5874e-16
Mrps28	1.39959	7.01332e-08
Nme1	1.39939	6.37201e-22
Auts2	1.39859	0.0286228
Rfc3	1.3975	1.31003e-10
Tomm6	1.39746	8.17095e-10
Mrpl22	1.39693	1.54009e-06
C1d	1.39527	8.99862e-08
Prdx4	1.39509	4.45298e-07
Usp14	1.39362	4.31217e-15
Rpa2	1.39334	3.1719e-12
Atp5o	1.39297	5.80461e-13
Casp3	1.391	2.96539e-09
Aldh18a1	1.39092	1.28198e-19
Bub3	1.39008	3.7443e-20
Prps2	1.38964	1.09731e-18
Pusl1	1.38959	7.82079e-10
Thoc3	1.38949	2.34973e-21
Ssx2ip	1.38865	5.79746e-07
Gemin5	1.38829	1.41892e-23
Alg8	1.3879	6.8077e-10
Ift22	1.38674	4.92887e-09
Polh	1.3858	1.90939e-14
Idi1	1.38449	6.37904e-09
Hist2h2ab	1.38277	4.36624e-07
Zfp422	1.38239	5.7293e-23
Hist1h1t	1.38162	0.0481489
Zbtb45	1.3796	1.13268e-07
Pebp1	1.37934	5.93605e-19
Psmg1	1.37807	1.60343e-06
Ckap5	1.37698	2.87819e-25
Fxn	1.37623	8.84299e-07
Cycs	1.37555	3.49419e-15
Polr1b	1.37491	4.77652e-26
Nudt19	1.37471	3.86204e-14
Dna2	1.37121	4.71418e-09
Ndufa9	1.37014	1.27433e-10
Extl2	1.36979	1.70027e-06
Timm10	1.36973	6.20869e-07
Gclc	1.36969	2.76927e-24
Ipo7	1.36527	4.25796e-27
Fgfrl1	1.36515	0.00149661
Plxnb2	1.36461	1.1004e-16
Cenpa	1.3637	3.30942e-09
Rnf7	1.36349	3.1633e-12
St5	1.36288	1.51214e-05
Rnase4	1.36248	0.0160311
Eif2s1	1.36247	2.37572e-18
Ift122	1.36223	1.66342e-05
2700094K13Rik	1.36125	7.04844e-11
Hmbs	1.3602	2.56608e-11
Mgst3	1.35984	0.0120636
Slfn3	1.35885	1.55626e-09
Mrpl20	1.35869	6.10589e-10
Nudt5	1.35788	1.14068e-14
1500011K16Rik	1.35598	3.43091e-05
Pla2g12a	1.35584	2.4493e-07
Bend3	1.35558	4.96945e-14
Atp5g3	1.3548	4.01786e-15
Fam96a	1.35437	2.49667e-12
H2afv	1.35242	6.78608e-15
Eri2	1.35239	1.95737e-10
Slc19a2	1.35215	3.57739e-08
Dscc1	1.35088	0.000400216
Anapc13	1.3507	0.000109399
Cox7b	1.34968	4.65793e-07
Cd93	1.34963	6.06214e-18
Ccdc86	1.34914	3.21736e-07
Cetn3	1.34913	2.28161e-07
Pgam1	1.34845	2.19305e-18
Ndufb4	1.34736	1.09582e-07
Snhg7	1.34654	4.94531e-09
Gfod2	1.34581	0.00222325
Mex3b	1.34463	1.87968e-07
Cenpl	1.34451	7.36825e-08
Nup205	1.34401	1.70858e-22
Ethe1	1.34236	1.94697e-08
Mcm8	1.34161	4.78328e-07
Kti12	1.33989	4.51462e-13
Ccdc40	1.33984	0.0397124
Hist4h4	1.33944	4.54485e-07
Psmc5	1.33924	2.43815e-11
Mrpl16	1.33886	9.51537e-10
Col18a1	1.33836	0.00213435
Zbed3	1.33818	5.36247e-10
Armc6	1.33753	3.12544e-08
Hist1h2bn	1.33741	4.88568e-06
Hist1h3a	1.33698	5.59241e-08
Ppid	1.33681	1.01766e-14
Fkbp3	1.33674	5.60289e-11
Pde2a	1.33525	1.06223e-22
Mpst	1.3342	4.50073e-09
Magohb	1.33323	0.00468594
Tuba1b	1.33208	7.17443e-10
Kdelc1	1.33081	0.000282044
H2afz	1.33039	1.01022e-11
Hsd17b10	1.32913	1.43619e-07
Tmem256	1.32863	1.86426e-07
Ndufa10	1.32839	2.65707e-13
Zfp599	1.32813	1.44375e-08
Prmt1	1.32748	9.48733e-15
Pycrl	1.32692	4.13601e-08
Zak	1.32686	1.54821e-11
Nup107	1.32584	6.22213e-14
Apitd1	1.32542	1.09205e-05
Tln2	1.3218	0.00331342
Psma6	1.32153	2.74753e-11
Cct3	1.32126	9.32544e-25
Aprt	1.32122	1.16148e-12
Mmachc	1.32115	1.11647e-07
Cmss1	1.32079	2.50094e-07
Zfp286	1.32073	0.00352034
Cisd1	1.32072	3.45543e-08
Cct6a	1.31991	1.82917e-24
Cdca4	1.31937	1.28377e-15
Nif3l1	1.3187	1.30531e-09
Wdr76	1.31805	5.64673e-22
Dars	1.31797	3.46408e-17
Tsen2	1.31775	2.31738e-05
Bri3bp	1.31765	1.37093e-26
Dhrs13	1.31721	0.00904998
Spryd4	1.31716	2.35419e-08
Bag1	1.31669	2.39352e-12
Glrx3	1.3163	3.07834e-16
Hspa9	1.31509	1.09639e-25
Eif2b2	1.3147	1.42154e-08
Mrpl21	1.31442	2.06665e-07
Dsn1	1.31357	2.91371e-08
Prdx2	1.31287	2.84571e-12
Tubb4b	1.31219	2.00056e-14
Cdc34	1.31216	3.64802e-13
A830010M20Rik	1.31182	5.39296e-09
Fahd1	1.31122	0.000368318
Snhg1	1.31065	1.45278e-19
Uqcc2	1.30986	2.84304e-07
Mrps27	1.30917	1.13181e-06
Klf10	1.30876	2.09695e-10
Rrp9	1.30871	4.70729e-12
Eef2k	1.30815	1.28823e-12
Sdhd	1.30763	1.28579e-15
Pabpc4	1.3074	3.22664e-21
Vdac1	1.30659	4.37521e-22
Med30	1.30623	4.1945e-06
Calm3	1.30552	5.90756e-11
Slc12a3	1.30416	0.00086957
Psma5	1.30406	4.16523e-10
Mrps30	1.30317	4.35051e-11
Mrpl11	1.30273	2.9136e-10
Rnaseh2b	1.30185	3.06341e-08
Slbp	1.30169	5.44458e-19
Rrp15	1.30146	9.87525e-10
Pdcd5	1.30144	1.37356e-07
E2f3	1.30019	3.34129e-14
Fasn	1.29997	2.87215e-28
Polr3k	1.29804	2.22691e-14
Zscan12	1.29705	1.00484e-05
Orc2	1.29696	1.1585e-17
Cirh1a	1.29596	2.52146e-12
Rwdd2b	1.29461	4.58946e-07
Rfwd3	1.29439	4.6344e-31
Mrpl40	1.29387	1.5608e-08
Snrpb2	1.29376	3.21956e-10
Jade3	1.29288	1.7939e-07
Mthfd1l	1.29136	3.60596e-19
Ftsj1	1.29085	8.6548e-09
St3gal4	1.29065	1.1691e-05
Tmem147	1.29033	1.34946e-11
Mrps33	1.29032	1.04962e-09
P2rx2	1.28985	0.0461633
Pfkm	1.28872	3.22188e-05
Metap2	1.28824	1.83204e-21
Adh5	1.28761	3.65024e-16
1190007I07Rik	1.28755	2.64928e-05
Snord47	1.28673	0.0356641
Cox6a1	1.28658	7.60608e-14
Camk2a	1.28642	1.08797e-05
Nr4a2	1.2861	0.024067
Timm17a	1.28589	1.89872e-06
Fam216a	1.28443	2.53557e-05
Hint1	1.28414	7.76116e-11
Slamf7	1.28412	6.70191e-15
Cox7a2	1.28411	9.93814e-10
N6amt2	1.28234	0.00102507
Map2k3os	1.28222	0.0204287
Rpl34	1.28145	0.00774322
Prdx3	1.28109	8.34147e-11
Arhgap33	1.28096	8.6548e-09
Vpreb3	1.28091	2.15416e-17
Stra13	1.2783	2.28753e-11
Gtf2h4	1.27758	1.37432e-08
Tssc4	1.27645	1.58104e-10
Fkbp11	1.2764	0.00076234
Psmd8	1.27599	4.32957e-14
Psph	1.27584	2.6654e-06
Poldip2	1.27532	8.51511e-14
Tceb1	1.27482	3.92688e-07
Wdr61	1.27449	8.55775e-09
Rars	1.27388	1.28638e-12
Hypk	1.2728	5.46107e-06
Etf1	1.27276	3.82863e-27
Wdr60	1.2722	0.0116488
Ran	1.27149	8.33293e-24
Ddx1	1.2709	2.21557e-12
Mrps26	1.27052	2.6255e-14
Cchcr1	1.26985	9.84294e-07
Ppp1r8	1.26957	3.01852e-14
Gm13051	1.26922	0.0394272
Gspt1	1.26913	9.09555e-26
Dstn	1.26829	7.3269e-16
Tmem109	1.26816	1.89435e-12
Ak2	1.26702	6.49011e-20
Cox19	1.26662	6.01567e-05
Slc39a8	1.26192	0.00100936
B3galt6	1.26147	1.13684e-08
Nhp2l1	1.26081	2.76623e-17
Abhd17c	1.26061	9.71131e-08
Ube2cbp	1.26048	0.00276322
Eprs	1.26003	3.13893e-18
Mrpl46	1.25972	1.04002e-06
Polr2h	1.25887	1.36666e-10
Hmgcll1	1.25862	0.000970637
Ppm1e	1.25855	1.27518e-11
Zfp518b	1.25772	3.84364e-08
Ndufa1	1.25759	0.000326875
Snord68	1.25724	0.0444885
Pbdc1	1.25699	6.77572e-06
Isoc1	1.25578	1.12398e-12
Polr2i	1.25558	1.77677e-05
Dnah8	1.25535	5.77077e-09
C230052I12Rik	1.25476	3.20324e-08
Snord69	1.25463	0.0317773
Ssr2	1.25449	5.19703e-12
Tbl3	1.25403	1.31195e-14
Ndufb2	1.25263	5.33161e-06
Ahsa1	1.25243	7.45821e-16
Ccne1	1.25124	2.28257e-14
Cdk2ap1	1.25055	8.91223e-13
Sept10	1.24986	0.00730874
Ipo11	1.24955	3.18006e-17
Smdt1	1.2492	2.21117e-09
Ndufa4	1.2491	3.84779e-10
Aarsd1	1.24871	3.69664e-11
Znrf3	1.24868	3.11221e-09
Dpy19l1	1.24858	2.85767e-19
Mphosph10	1.248	3.13951e-11
Uqcrc2	1.24748	2.12373e-10
Ecsit	1.24623	3.02717e-13
Zc3hav1l	1.24582	3.51263e-05
Rcc2	1.24535	7.90766e-30
Mrps14	1.24525	4.14334e-09
Ptpmt1	1.24459	2.29202e-05
Nudt2	1.24449	0.00707774
Nudt21	1.244	5.87315e-15
Ppif	1.24367	2.38227e-12
Smarca4	1.24345	4.07671e-17
Fam60a	1.24334	5.32201e-17
Mrpl41	1.24273	7.57099e-07
Abcf2	1.24255	8.36212e-16
Actl10	1.24243	0.0420837
Pop1	1.24117	2.71788e-08
Ube2e3	1.24013	3.89717e-10
Eif4e	1.23908	2.98277e-12
Hmgb2	1.23793	0.000369261
Asna1	1.23749	6.67146e-08
Fancb	1.23747	8.54418e-06
Arl3	1.23732	0.0137628
D2Wsu81e	1.23684	3.98192e-10
Odc1	1.23655	1.30189e-09
Dars2	1.23612	5.57095e-09
Yif1b	1.23582	5.27539e-08
Lmo4	1.23412	3.76501e-11
Apip	1.23383	0.00422452
Mrps11	1.2335	1.13769e-05
Lsm8	1.23345	1.78493e-07
Psmc3	1.23336	1.24243e-10
Txnl1	1.23326	1.81584e-12
Dbr1	1.23269	2.75604e-08
Ssrp1	1.23226	2.56162e-12
Mrpl57	1.23182	4.61938e-10
Ppie	1.23161	1.47909e-08
2410127L17Rik	1.2315	5.196e-10
Eno1b	1.23063	7.13212e-13
Coq4	1.22971	4.83966e-05
Frat2	1.22789	1.05249e-09
Tmem70	1.22782	3.65502e-08
Sdhc	1.22666	6.51154e-12
Trim32	1.22553	8.73572e-07
Snrpb	1.22512	3.85431e-16
Hist1h4f	1.22509	0.00630319
Dnajb13	1.22481	6.64258e-08
Pcbp1	1.22313	5.92635e-21
Rbmxl1	1.22299	5.45893e-12
Marveld1	1.22238	0.00108536
Psmd14	1.22154	1.14989e-09
Psmd1	1.22009	9.29308e-15
Psmd3	1.22002	2.65854e-14
E130201H02Rik	1.21965	0.00414457
Ndc1	1.2195	5.98363e-07
Cox6c	1.21949	9.02311e-07
Sec61b	1.21906	9.87709e-08
Bcl7a	1.21865	1.43618e-15
Eif2s2	1.21794	1.94241e-22
Cdc37	1.21777	1.20248e-12
Mettl9	1.21759	2.50634e-09
Cox17	1.21752	0.000739575
Dld	1.21676	1.98715e-10
Acaa2	1.21576	2.16672e-08
Gtpbp10	1.21417	2.81074e-06
Qdpr	1.21347	1.29152e-10
Zbed4	1.2134	4.48533e-25
Umad1	1.2127	1.53949e-09
Memo1	1.21258	3.76876e-12
Wbp5	1.21248	0.000191837
Smc3	1.21174	3.23951e-17
Eif1ad	1.21153	1.62219e-15
Mcph1	1.21065	2.15272e-14
Blmh	1.21044	8.6144e-13
Fam92a	1.20898	3.51153e-05
Nup43	1.20786	9.27024e-07
Plp2	1.2077	1.20576e-08
Mgme1	1.20667	2.28168e-06
Acaca	1.20503	8.2476e-25
Ncl	1.20437	9.2913e-26
Kpna3	1.20395	4.07377e-22
Gtf3c4	1.20308	1.75153e-25
Mrpl30	1.20266	2.13936e-07
Mogs	1.20243	4.49191e-19
Tppp	1.20149	0.000135075
Anp32a	1.20136	1.16178e-14
Lcmt1	1.20119	0.000145532
Dis3	1.19952	2.3085e-18
Vma21	1.1994	2.41859e-07
Ndufb8	1.19938	3.01236e-12
Gm3258	1.19935	0.000139455
Peo1	1.19928	1.89435e-12
Gm5801	1.19925	0.00190665
Hadh	1.19905	3.15289e-13
Ccp110	1.19886	8.43304e-14
Znhit3	1.1988	3.17633e-05
Mrpl19	1.19845	3.82349e-13
Cct8	1.19734	4.62535e-20
Hist2h2ac	1.19719	3.25959e-09
Arl5c	1.19683	2.53356e-18
Asrgl1	1.19636	2.24838e-12
Coa3	1.19634	3.72538e-06
Ndufab1	1.19515	3.44333e-06
Naa50	1.19492	3.539e-16
Tmem11	1.19402	5.98949e-08
Aldh9a1	1.19364	6.85241e-14
Zfp367	1.19245	2.18239e-13
Pgls	1.19186	1.66741e-12
Slc39a6	1.19005	1.57024e-09
Mrpl52	1.18925	1.66381e-06
Atp1b3	1.18877	3.06211e-19
Serinc5	1.18797	1.7862e-25
Larp7	1.18761	3.49427e-08
Coro1c	1.18737	5.83299e-14
Mrpl28	1.18709	4.35051e-11
Spn	1.18709	5.53874e-14
Bak1	1.18672	7.22589e-14
Exosc2	1.18648	1.55439e-15
4933404O12Rik	1.1859	6.27968e-06
Rgs12	1.18581	9.6326e-06
Nedd8	1.18445	6.37553e-09
Naa10	1.18443	2.64077e-14
Neto2	1.18406	0.00192997
Tmem14c	1.18395	4.42622e-09
Mrps22	1.18393	4.30807e-08
Llph	1.18352	4.55267e-10
Nuak1	1.18317	7.14755e-06
Rab26	1.18291	0.0164743
Gtf2f1	1.18249	2.39239e-09
Mrps18a	1.18246	1.03455e-06
1700021F05Rik	1.1823	0.00549283
Xrcc1	1.1821	2.47841e-16
Brix1	1.18112	5.76787e-08
Stoml2	1.17929	1.22762e-10
Ddx21	1.17908	1.45315e-17
Lrp5	1.17908	0.000202734
Abcb8	1.17869	1.74201e-10
Pdha1	1.17862	5.68706e-11
Snhg6	1.17761	2.18558e-05
Fam20b	1.1775	3.73108e-21
Rexo2	1.17594	3.34918e-08
Gm10451	1.1759	2.28623e-06
Polr1d	1.17588	5.37505e-12
Lsm12	1.17584	3.23459e-07
Sbf2	1.17478	4.86992e-09
Atad3a	1.17368	7.39648e-22
Set	1.17338	6.16707e-20
Gclm	1.17277	4.2088e-05
Amotl1	1.17249	0.016377
Smim4	1.17224	0.000133022
Tex30	1.17186	5.04993e-08
Stac2	1.17096	8.92547e-07
Dera	1.1709	1.72102e-08
Prps1l3	1.17017	3.50448e-19
Glo1	1.17006	8.86044e-10
Haus2	1.16817	1.11647e-07
Stxbp1	1.16797	7.03428e-05
Dazap1	1.1678	9.98185e-13
Rmdn3	1.16759	5.29773e-09
Rnf219	1.1672	9.74788e-13
Galnt7	1.166	1.31072e-13
Hspe1	1.16567	1.4714e-10
Rmi2	1.16555	1.04484e-09
Timm23	1.16481	5.64231e-13
Gk5	1.16468	2.49757e-06
Psmd12	1.16462	4.86681e-10
Sdhb	1.16406	1.85958e-07
Fam89b	1.16402	5.1153e-06
Lgals9	1.16394	2.03254e-12
Uqcr10	1.1618	8.23103e-07
Gar1	1.16063	1.73047e-06
Ndufs8	1.16037	2.90603e-07
Lpcat4	1.16028	5.5717e-05
Dtymk	1.16014	3.13335e-13
Yars	1.15999	9.11131e-13
Sec61g	1.15988	9.78105e-05
Bst2	1.15975	0.000219442
Mrpl48	1.15924	1.1934e-05
Mrps17	1.15906	2.68433e-11
Cdc42ep4	1.15828	4.58133e-07
Hnrnpab	1.15809	1.84288e-16
5730408K05Rik	1.15734	0.0141995
Ppm1g	1.15581	3.22968e-13
Ndufv2	1.15562	5.12001e-10
Bysl	1.15558	1.95186e-11
Rsl24d1	1.15417	8.51525e-15
Pkd1l3	1.15375	1.08554e-07
Lsm4	1.15341	3.13815e-09
Prpf19	1.15194	3.27217e-12
Ampd2	1.15129	1.40326e-15
Rnps1	1.15103	6.09476e-17
Slc25a5	1.15053	1.87734e-13
Coa6	1.14996	0.000391296
Prx	1.14971	0.0252253
Tomm7	1.14859	1.22498e-05
Myadml2	1.1484	0.0217332
Xpot	1.14787	2.4844e-22
Mdh2	1.14672	2.59982e-16
Tomm20	1.14658	2.24004e-11
Fhit	1.14504	0.00549294
Eri1	1.14477	1.0247e-20
Dck	1.14415	2.64269e-22
Tube1	1.14389	3.22403e-05
Psma4	1.14359	1.72612e-07
Ccdc116	1.14254	0.0034783
Hspbp1	1.14168	3.79872e-09
Hist2h2bb	1.14166	0.00183901
Snrpd2	1.14144	2.04062e-05
Raly	1.14117	4.20791e-12
A730008H23Rik	1.14088	2.6445e-07
Abce1	1.1404	4.04848e-23
Snrnp35	1.13975	0.00214951
Eif3g	1.13968	7.29254e-11
Trim28	1.13927	9.87701e-32
Nup155	1.13917	6.85711e-19
1810043H04Rik	1.13792	0.000386287
Mrps2	1.13789	1.07662e-11
Snrpd3	1.13776	2.89986e-06
Klf9	1.13758	4.40471e-07
Ebna1bp2	1.13717	2.96786e-12
Slc25a15	1.13711	1.35839e-09
Suv39h2	1.1368	0.000217893
Akap17b	1.13522	2.06127e-08
Mpp6	1.13439	9.18995e-12
Ndufa5	1.13407	1.21538e-05
Shb	1.13302	0.0135781
E130309D02Rik	1.13282	1.83699e-11
Gstp1	1.13095	2.14441e-05
Hist1h2bb	1.13085	1.03566e-05
Shq1	1.13085	3.61297e-05
Msh2	1.13013	1.12398e-12
Pfdn1	1.13012	2.60054e-06
Thumpd1	1.129	2.04967e-10
Fundc2	1.12792	3.33073e-06
Uqcrfs1	1.12741	7.39235e-13
Mybbp1a	1.12738	1.36897e-23
Efcab11	1.12716	0.00463732
Rnpep	1.12662	6.80276e-05
Ipmk	1.12627	4.24664e-15
Fdps	1.12616	1.19299e-06
Smtn	1.12368	0.00876832
Tmem237	1.12293	0.0428292
Hmgn1	1.12273	1.15524e-10
Zgrf1	1.12209	1.45632e-07
Hn1l	1.12206	1.77873e-12
Lphn1	1.12193	1.23761e-09
Taf9	1.12147	2.81026e-12
Smc1a	1.12139	4.1737e-12
Chordc1	1.12037	1.60343e-06
Mblac1	1.11952	0.0272866
Wdr5	1.11888	7.8914e-21
Actl6a	1.11768	9.99742e-12
Cdc7	1.11723	3.30757e-12
Psmb3	1.11643	7.24019e-09
Hsp90aa1	1.1164	2.81816e-11
Mrpl15	1.11622	7.42482e-11
Mmgt1	1.11598	3.36538e-10
Prdx1	1.11545	1.41561e-08
Nop56	1.11526	9.20856e-18
Tmem261	1.1152	8.18731e-10
Wdr55	1.11493	6.5702e-09
Psmg4	1.1149	6.20366e-06
6330549D23Rik	1.11473	0.00898666
Mrpl55	1.11419	0.000253126
Vim	1.1135	8.82599e-19
Zfp955a	1.11347	3.1297e-08
Pccb	1.11304	5.66525e-05
Ssna1	1.11295	7.38439e-09
Mrpl35	1.11275	4.40594e-10
Cep128	1.11185	2.71001e-08
Hist1h4m	1.11118	8.34661e-06
Nle1	1.1096	1.46893e-09
Ftsj3	1.10952	1.96682e-11
Gid4	1.10945	1.89282e-16
Emc6	1.10936	2.74413e-12
Morf4l2	1.10819	1.67792e-15
Myadm	1.10756	4.71661e-10
Hist1h2ac	1.10672	1.20717e-05
Pes1	1.10622	2.95374e-10
Praf2	1.10442	7.43146e-05
Tefm	1.10353	0.00079492
Fdx1	1.10351	0.000900991
Rfc5	1.10252	1.05316e-11
Snrpe	1.10251	4.24025e-10
Snrnp40	1.10133	1.04078e-09
Med21	1.1011	0.0022592
Romo1	1.10059	0.000186343
Fam96b	1.10007	0.000589779
Eif3b	1.09902	9.99192e-16
Gtf2f2	1.09892	3.08164e-08
Kcnab2	1.09813	5.26388e-19
Lxn	1.09807	0.00050294
G2e3	1.09794	2.46375e-11
Cnih1	1.0968	5.35594e-10
Uqcc3	1.09574	0.000214336
Sarnp	1.09546	4.36489e-07
Psma1	1.09344	5.66488e-13
Mrpl38	1.0934	5.06164e-09
Lsmem2	1.09295	0.0341439
Psmc6	1.09164	1.25212e-10
Aamdc	1.09079	0.00742292
Mrps6	1.09058	0.00245678
Ict1	1.09031	1.81757e-07
Heatr3	1.0902	5.38551e-12
Vdac3	1.08907	7.89445e-12
H2afj	1.08903	7.66172e-11
Isyna1	1.08894	4.95045e-13
Acads	1.08861	4.57838e-07
Coa7	1.0877	1.28607e-06
Pin4	1.08743	0.000829646
Mrps24	1.08692	7.49027e-06
Fcf1	1.08522	1.0422e-05
Myo19	1.08402	7.89743e-08
Smim13	1.084	1.90233e-09
Nnt	1.08394	8.33416e-07
Lrrc8b	1.08393	0.000598536
Ept1	1.08346	2.43994e-13
Chchd2	1.08299	7.62196e-08
Mettl13	1.08291	1.04755e-11
Glrx	1.08244	0.00377184
Mdh1	1.08183	1.65505e-07
Knop1	1.08161	3.41793e-19
Ndufb3	1.08152	1.4931e-05
Aimp1	1.08144	2.57199e-07
Txndc17	1.07923	6.61447e-07
Gins4	1.07857	3.57922e-07
Rrp7a	1.07801	9.78265e-12
Phb2	1.07772	5.79603e-13
Ostc	1.07768	6.18595e-06
Yae1d1	1.07764	1.46702e-07
Desi1	1.07762	2.60773e-09
Nme2	1.07699	1.18361e-05
Nde1	1.07641	6.02142e-12
Wdr18	1.07613	1.10123e-13
0610010K14Rik	1.07606	1.77074e-05
Mir17hg	1.0759	2.78762e-09
Ctu1	1.07553	4.2088e-05
Hdac2	1.0755	1.44369e-14
Eif4a3	1.07544	2.14687e-11
Sf3a3	1.07462	1.64979e-09
Stip1	1.07422	4.36578e-09
Tsfm	1.07394	2.86256e-09
Exosc8	1.07391	1.81332e-08
Xk	1.07356	3.08473e-07
Smarce1	1.07319	6.95194e-11
Pitrm1	1.07314	2.20465e-10
Ddt	1.07299	0.00322865
Rwdd1	1.07272	1.25501e-06
Psma7	1.07232	1.30637e-11
Ttf2	1.07229	1.41773e-14
Scrn3	1.07223	0.000739707
Arid3a	1.07216	1.18133e-15
Rbm8a	1.07111	9.84204e-09
4930404N11Rik	1.0708	5.05598e-05
Tdg	1.07072	1.27458e-13
Ywhah	1.07063	3.39359e-13
Anapc15	1.06924	1.42101e-05
Kpnb1	1.06882	6.9595e-28
Ssbp4	1.06799	7.14667e-10
Pkm	1.06798	1.33873e-11
Eif6	1.06763	2.21028e-11
Scd2	1.06756	3.75344e-19
Prpf31	1.06744	3.90187e-09
Thap11	1.06733	2.18051e-09
Sigmar1	1.06718	0.00012697
Snord93	1.06707	3.67187e-06
Gtf2h5	1.06525	1.28052e-06
Rnf126	1.06427	1.33395e-09
Cluh	1.06394	1.50368e-15
Akip1	1.06381	0.00780373
Klhl9	1.06288	2.32896e-13
Bcap29	1.06228	5.48807e-06
Ubqln4	1.06186	2.15977e-12
1500012F01Rik	1.06149	5.9398e-08
Uqcrc1	1.06134	6.14097e-13
Rbm17	1.06134	2.03455e-07
Ndufb7	1.06132	8.56107e-09
Smc4	1.06074	2.03497e-20
Tst	1.05895	0.0399901
Mydgf	1.05891	3.89667e-08
Ten1	1.05886	0.000507715
Rpn1	1.05866	1.20553e-10
Mphosph6	1.05731	0.00370776
Dhrs4	1.05639	0.000465738
Pgrmc1	1.05621	9.86492e-06
Usp39	1.05612	5.37098e-10
Fem1b	1.05597	1.28812e-20
Polr1c	1.05535	8.44282e-10
Dohh	1.05535	4.94735e-10
Sumo3	1.05505	1.17812e-10
Prkcsh	1.05504	1.79771e-10
Ecm2	1.05438	0.000494956
Smn1	1.05429	6.82955e-07
Dlat	1.05424	5.07244e-11
Capn5	1.0538	7.8532e-11
Hspa1a	1.05334	0.0490428
Psmb2	1.05254	4.09465e-08
Mrpl54	1.05207	4.67645e-05
Nol4l	1.05058	0.0032637
Nop9	1.04997	3.1597e-11
Psmd6	1.04942	5.16369e-10
Slc7a1	1.04912	7.14067e-16
Ncbp1	1.04898	1.07526e-12
Ap3s1	1.04845	0.00283417
Fh1	1.04786	2.33458e-07
Stambpl1	1.04752	1.54731e-09
Arl6ip4	1.04752	6.97659e-09
Nup133	1.04573	1.54387e-10
Snrpg	1.04531	6.1294e-07
Nek4	1.04507	0.000251435
Gemin8	1.04461	9.18332e-05
Sf3b6	1.04428	3.57125e-08
Erf	1.04351	0.000152394
Ccdc107	1.04334	5.6804e-05
Ckap4	1.04331	3.28764e-07
Mien1	1.04317	1.31558e-05
Tmpo	1.04308	2.07154e-27
Tubb5	1.04308	4.40232e-09
Timm21	1.04293	1.4303e-07
Zcchc17	1.04262	1.14068e-06
Isoc2a	1.04143	9.81454e-06
1110001J03Rik	1.04071	0.0033316
Npm1	1.04012	1.73655e-12
Psmd13	1.03944	6.37446e-13
Canx	1.03941	3.05509e-18
Cox5b	1.03874	4.16296e-07
Atp13a3	1.03861	1.533e-23
Cuta	1.03771	5.642e-08
Dnajc8	1.03655	9.69473e-07
Naa20	1.03652	1.6134e-05
Mdm1	1.03625	1.2839e-06
Bzrap1	1.03599	6.33614e-08
Nkrf	1.03556	1.38765e-08
Mllt4	1.03525	0.00358595
Gpatch4	1.03432	9.16954e-07
Pgd	1.03429	9.74916e-10
Mrpl51	1.0339	4.52089e-08
Dnajc15	1.03335	0.00643459
Vamp7	1.03327	0.0026653
Tmco1	1.03302	3.12922e-05
Eif3d	1.03295	2.74948e-11
Tdp1	1.03173	8.21626e-08
Pnpo	1.03083	6.58764e-08
Ndufv1	1.03074	7.78145e-13
Pde12	1.0305	8.36532e-09
Rpusd2	1.02968	5.91892e-09
Skp1a	1.02776	1.82489e-08
Csrp1	1.02689	4.0628e-06
Bop1	1.02614	4.0458e-16
Cox10	1.02543	2.33092e-07
Rbm15b	1.02519	8.90026e-18
Pcyox1l	1.02459	0.00171312
Cct7	1.02317	1.69634e-16
Psmc2	1.02314	8.00575e-07
Exosc9	1.02259	2.47572e-06
Sf3b4	1.02238	1.73288e-09
Mrpl9	1.02166	2.56608e-11
Lman1	1.0214	6.46682e-08
Net1	1.02128	1.11526e-12
Suclg2	1.02099	1.09075e-08
Amd1	1.02094	1.43618e-15
Ptges2	1.02079	9.68786e-05
Wdr74	1.01996	5.07843e-11
March8	1.01905	0.000377626
4930427A07Rik	1.01849	5.07548e-11
Eif3l	1.018	6.14662e-13
Palb2	1.01793	4.91182e-07
Efcab7	1.01784	0.004881
Ube2l3	1.01756	4.18866e-13
Mex3d	1.01672	0.000118209
Psmd2	1.01662	6.22138e-11
Mrrf	1.0162	0.000555125
Ssb	1.01613	2.3758e-10
Psmg2	1.01543	9.5456e-06
Fkbpl	1.01382	0.0444538
Atg101	1.01158	3.81175e-09
Enoph1	1.01103	1.33083e-05
Mrpl42	1.01026	6.40328e-07
Pkp4	1.01021	0.000150265
Etfb	1.01012	1.90134e-06
Slc43a1	1.00991	1.97944e-06
Rpn2	1.00804	7.18322e-10
Otud6b	1.00785	9.52541e-08
Grpel1	1.0072	2.22007e-07
Tomm70a	1.00686	1.41561e-11
Gnb1l	1.00646	0.000326539
Slc39a11	1.0058	0.00115676
2700081O15Rik	1.00413	9.25156e-11
Bckdha	1.00408	0.000601287
Gmps	1.00355	2.19157e-10
Syncrip	1.0031	2.57967e-20
Nelfe	1.00302	1.22227e-06
Eif3j1	1.00293	2.5604e-08
Tomm40	1.00218	4.37168e-14
Rbbp4	1.00214	1.62398e-10
Cnpy2	1.00179	6.47115e-05
Nadk2	1.00148	9.95486e-08
Pdcd6	1.0009	6.46154e-08
Mrps23	1.00047	1.81996e-08
Sf3a1	0.999619	4.95084e-15
Seh1l	0.999234	1.15067e-11
Neurl1b	0.999226	0.00213031
Rfx2	0.999123	0.00115263
Maz	0.998654	4.58303e-21
Tmem101	0.99845	0.000321485
Bhlhb9	0.998405	1.79354e-05
Cox6b1	0.9977	8.63971e-06
Acsl5	0.996241	4.62409e-12
Supt16	0.996156	2.79027e-18
Champ1	0.996073	6.84983e-09
Ywhae	0.995929	2.14566e-16
Slc25a10	0.99543	3.47532e-06
Hyal2	0.995225	0.0062718
Xpo1	0.994921	2.42035e-19
Doc2a	0.99315	0.00020686
Cyc1	0.992315	3.46516e-11
Adss	0.991856	1.06506e-11
Aurkaip1	0.991655	7.56113e-08
Dtwd1	0.991176	0.00551689
Coil	0.990613	3.80323e-05
Rbmx2	0.988313	0.000769689
Aven	0.988264	4.76294e-05
Pcyox1	0.987191	6.68681e-06
Slirp	0.987011	0.00272182
Prmt7	0.986665	8.95128e-11
Zkscan17	0.986491	6.86073e-09
1110004F10Rik	0.986196	7.41199e-06
Myeov2	0.985948	5.71368e-06
Etfa	0.985766	1.45719e-05
C030006K11Rik	0.985679	0.000241026
Usp2	0.985558	0.0413197
Scarb1	0.985534	4.06808e-07
Ndufb11	0.985166	7.84303e-06
Mrpl45	0.98388	3.56565e-09
P4hb	0.983713	1.39853e-13
Trim27	0.983577	5.63421e-14
Ammecr1	0.983326	5.95441e-08
Gstt2	0.983187	4.67775e-05
1810055G02Rik	0.983043	0.0484403
Cmtr2	0.982563	9.72055e-06
Eif5a	0.981632	6.55858e-12
Rad23b	0.981261	1.94085e-12
Mak16	0.980944	4.93087e-09
Rps19bp1	0.980826	0.000130664
Psmc1	0.980739	2.20087e-09
Ttc30a1	0.980494	0.00598217
Adsl	0.979625	5.71527e-09
St13	0.97893	7.09724e-10
Qtrt1	0.978622	4.82441e-07
Hspa12a	0.978263	0.00492648
2700060E02Rik	0.977578	1.47982e-08
Ppm1f	0.977209	5.39241e-13
Prkci	0.97719	1.34934e-08
Fpgs	0.977129	2.75949e-06
Hnrnph2	0.976116	3.04244e-06
Spr	0.976101	0.00492648
Celsr1	0.975904	2.77258e-05
Psmb7	0.97583	1.9635e-07
Taf1d	0.974983	8.78543e-14
Ddx28	0.974914	1.90394e-05
Ebp	0.974184	6.17557e-06
Pdcd2	0.973702	2.47761e-08
Acat2	0.973344	0.000526495
1110065P20Rik	0.973206	0.0383043
Wdr83os	0.973182	3.49258e-06
Pafah2	0.971598	0.0488512
Ndufa2	0.971557	8.11758e-06
Drg2	0.971469	2.72455e-06
Api5	0.971285	2.44407e-15
Trib2	0.968961	3.54059e-11
Carhsp1	0.968898	1.56135e-08
Wdr75	0.968319	2.83771e-12
Hjurp	0.968244	4.30734e-12
Cops2	0.967364	6.28301e-08
Xrcc2	0.967292	0.000178039
Vbp1	0.9667	2.95741e-07
Csnk2b	0.966391	9.71974e-07
Gas5	0.964193	2.16501e-17
Trap1	0.963087	3.57771e-14
AI506816	0.963001	6.308e-08
Mrps21	0.962921	0.000130938
Slc35a4	0.962248	3.12552e-07
Sod2	0.962241	1.70119e-11
Gm6654	0.96205	0.0232203
1110008F13Rik	0.961381	2.90686e-06
Ndufb9	0.961159	1.93769e-06
Ppp2r5d	0.960969	1.89894e-10
Mrpl3	0.960863	4.72871e-07
Vprbp	0.959379	1.12577e-13
Znhit2	0.958787	0.000374205
Akt1	0.958616	1.52451e-13
Pde5a	0.957647	0.00133058
Psmc4	0.957591	2.71606e-09
Mtap	0.956295	5.14735e-06
Rab9	0.95611	6.75407e-05
Ywhaq	0.955924	6.57369e-12
Asf1a	0.955895	2.07102e-06
Lbr	0.95584	2.00132e-13
Pgp	0.955744	3.87324e-10
2810428I15Rik	0.955462	0.000354421
Trmt112	0.955056	2.82352e-07
Mrps34	0.954929	0.00535954
Acbd6	0.954836	0.000117528
Msl3	0.954707	6.32621e-08
Sumo1	0.95442	2.83572e-08
Katnb1	0.954143	9.71262e-06
Dnajc9	0.952604	1.27831e-11
Wdr36	0.952589	8.82516e-12
Elp3	0.951789	6.08001e-09
Eif2a	0.950962	7.18484e-13
Uba2	0.948634	3.36502e-11
Ttc27	0.948328	2.10037e-05
Pwp1	0.948187	5.26115e-08
Klhdc4	0.94803	2.16012e-07
Psma2	0.948025	1.82491e-06
Polr2c	0.947913	2.56926e-07
Plrg1	0.946778	6.12e-05
Ddx18	0.946586	8.92708e-11
Zfp637	0.946194	0.000217825
Bap1	0.945921	2.77303e-12
Zfp64	0.945831	4.12425e-07
Golt1b	0.945828	5.31868e-06
Mettl16	0.945468	7.15946e-07
Cmpk1	0.945295	1.11449e-06
Higd2a	0.945286	3.08691e-05
Lrrc58	0.945262	7.58342e-13
Tsr1	0.945231	5.75478e-11
Smtnl2	0.944732	0.00943908
Nars	0.943696	1.07162e-10
Gtf2h3	0.943664	7.74247e-09
Npc2	0.943593	6.95863e-09
Ift27	0.943463	7.85947e-05
Them6	0.942581	3.91209e-08
Smpd4	0.942088	1.91427e-11
1700017B05Rik	0.941805	1.82361e-10
Mid1ip1	0.940803	5.02306e-06
D19Bwg1357e	0.940137	1.33267e-10
Mrps35	0.940055	0.000184214
Ubr7	0.939703	1.69518e-09
Timm8b	0.939565	0.000295735
Spata24	0.939208	0.00141956
Taf5l	0.938465	5.74161e-10
S100a4	0.938378	0.0479401
Tigd5	0.937996	0.00370958
Krtcap2	0.93798	0.000764304
Fancf	0.937679	0.000366133
Tsen15	0.936921	0.000670198
Dcbld1	0.936883	0.0010963
Wdr43	0.936734	1.28928e-13
Psmb6	0.936517	7.03867e-06
Rpp14	0.936025	1.93764e-08
Imp3	0.935965	1.1713e-09
Sars2	0.935495	1.28607e-06
Gm15421	0.93529	0.000730278
Gm15455	0.934131	0.00618487
Crip1	0.932476	0.000475172
Rbfa	0.932453	1.2988e-07
Nans	0.932219	3.3716e-06
Nup50	0.932089	4.25355e-12
Dnajc2	0.931921	9.78356e-12
Hax1	0.931798	7.32411e-07
Mpp3	0.931707	0.0138394
Akr1e1	0.931409	0.0330702
Tfg	0.930297	2.50122e-06
Oat	0.930014	6.03516e-06
Cbx1	0.929739	1.20524e-09
Hars	0.928994	3.6072e-09
Rrn3	0.928219	1.68666e-10
Caprin1	0.9278	6.38986e-17
Prep	0.92748	1.38998e-09
Gm13238	0.92731	0.0202636
Tcp1	0.927163	4.30517e-14
Impad1	0.927051	6.04309e-08
Eny2	0.926971	5.10755e-05
Med31	0.926872	0.00972422
Igf2bp3	0.926342	1.8018e-07
Vps36	0.926203	1.60518e-06
Pop4	0.926002	0.000188792
Mrpl49	0.925752	1.782e-07
U2af1	0.925206	9.69593e-10
Cct5	0.925108	1.22022e-08
Hmgb1	0.925093	3.18346e-08
Zdhhc1	0.924998	0.0215286
Rps26	0.924187	0.000173096
Vps26b	0.923584	6.30091e-06
Ppp2cb	0.923419	2.54452e-07
Ift57	0.923366	0.0381716
Cct2	0.922969	4.67091e-12
Nme6	0.922828	0.00437032
D430020J02Rik	0.922139	0.00367994
Prkcg	0.921865	0.00118846
Ilf2	0.919991	2.22209e-13
Hat1	0.919577	3.24203e-08
Ubl5	0.918219	7.42579e-05
Lpar5	0.917668	0.00172645
Txnrd1	0.917556	2.36099e-07
Nudt3	0.917268	5.80106e-11
Cdk2	0.916314	3.84253e-13
Polr2k	0.916104	0.005164
Larp1	0.91545	2.04696e-17
Zfp934	0.915155	0.0439713
Htatsf1	0.914793	5.72879e-09
Hist1h1d	0.914485	4.72191e-06
2700099C18Rik	0.914236	0.0252951
Ap2s1	0.914092	8.36758e-08
Orc1	0.913692	0.000732993
Fam185a	0.913536	6.1038e-08
Aars	0.913064	1.74684e-08
Tysnd1	0.912885	1.49318e-09
Zfp72	0.912787	0.0484934
Sap18	0.912368	9.06585e-09
Msto1	0.912283	5.08285e-06
Txn2	0.911993	0.000204688
Rpp40	0.911908	0.00483516
Rad21	0.911844	4.55239e-12
Edem3	0.911655	9.36926e-15
Hmgb1-ps7	0.911448	8.98587e-06
Myg1	0.910355	6.51157e-07
Psma3	0.910184	8.75554e-09
Eif3i	0.91015	4.18866e-06
Psme3	0.910135	1.01175e-12
Atp5e	0.910106	5.19027e-05
Mettl1	0.909175	3.59062e-05
Tsr2	0.908946	3.22443e-05
Cdc25b	0.908859	2.89098e-11
5730508B09Rik	0.908752	0.00760477
2410015M20Rik	0.907921	0.00136089
Slc7a6	0.907841	4.35051e-11
Hddc2	0.907199	0.00136085
Cops3	0.907022	7.6793e-06
Tfdp2	0.906514	6.87986e-11
Bola3	0.906502	0.011495
Hrsp12	0.906271	0.00524397
Commd1	0.905981	0.000348246
Mfsd3	0.905688	0.00137623
Hist1h2bc	0.905557	0.000459589
Rpap3	0.905191	0.000121688
Ccdc58	0.90514	0.00022733
Srsf2	0.904705	4.28139e-16
0610010F05Rik	0.904696	0.000475786
Bccip	0.90469	7.20712e-06
Repin1	0.904664	3.14394e-05
Tuba4a	0.90456	1.14264e-05
Agfg2	0.904501	1.62487e-06
Ndufa7	0.903752	5.00881e-05
Slc25a17	0.903339	3.72459e-06
Acp1	0.902953	5.68802e-07
Psmb4	0.902722	2.06458e-06
Nup85	0.902594	2.28193e-10
Serbp1	0.901491	3.98001e-15
Scrn2	0.900786	0.000189789
Emc7	0.90077	0.000104149
Thoc7	0.900702	2.65531e-06
Pop7	0.900641	0.000125458
Nudt9	0.900265	0.00111538
Eftud2	0.899894	2.60789e-15
Armc1	0.899842	1.90782e-09
Mtch1	0.89972	3.68221e-08
Nol12	0.89964	0.00127026
Ube2m	0.899463	2.69268e-09
Eif3h	0.898932	1.79593e-08
Urb2	0.898691	1.26267e-11
Vps35	0.898551	1.67298e-06
Sms	0.898217	5.17655e-10
Nip7	0.898214	3.29625e-09
Chst12	0.897724	3.21744e-05
Nap1l1	0.896834	4.114e-18
Gpd1l	0.896013	4.33441e-17
Pelo	0.896009	0.000388813
Oxld1	0.89566	0.0259571
Snora43	0.895444	2.42092e-05
Casp7	0.895285	1.01736e-05
Gm10069	0.894979	4.42914e-05
Tbl2	0.894667	1.46749e-07
Topbp1	0.894596	6.60328e-14
Timm17b	0.894437	7.2162e-06
Dhx33	0.894419	4.0694e-15
Bcas2	0.894247	3.35986e-05
Cetn2	0.893485	0.000374051
Mrpl44	0.893454	0.000158202
Gfer	0.892869	2.80439e-06
Mbd3	0.892839	2.6176e-09
Gtf3c5	0.892764	6.21872e-05
Dnttip2	0.892747	2.78877e-06
Zfp661	0.892739	0.00192116
Ccdc90b	0.89269	0.0428657
Msh6	0.892588	1.17313e-13
R3hcc1	0.891319	0.00111497
Otub1	0.891309	2.20855e-07
Noa1	0.891115	4.75404e-08
Lin54	0.89053	9.99546e-08
Mrps7	0.890458	3.6556e-07
Ubfd1	0.89005	1.41001e-06
Noc4l	0.889981	2.02011e-07
Cse1l	0.889953	1.83955e-11
Casp8ap2	0.889906	1.66584e-11
Txnl4b	0.889765	0.00415973
Gm5643	0.889094	0.00191981
Gtf2b	0.888895	6.30908e-06
Nup35	0.888341	3.22753e-05
Rcan1	0.888194	0.00124161
Zfp629	0.887934	2.36152e-06
Rbl1	0.887592	1.89855e-08
Polr1e	0.887504	7.3806e-07
Timm9	0.887257	2.3489e-08
Brca2	0.887102	1.75446e-06
Hist1h4h	0.887065	0.000175188
Denr	0.886775	7.83208e-05
Parl	0.886772	6.74885e-05
Vdac2	0.885534	2.76484e-10
Arl1	0.885518	8.01039e-05
Focad	0.884761	2.77177e-06
Isca1	0.884564	4.78492e-06
Khsrp	0.884322	4.89346e-15
Rrp8	0.884139	5.05037e-08
Itpa	0.883441	8.38746e-07
Lamtor5	0.882982	7.76655e-06
Zdhhc3	0.882618	1.3508e-12
Cdkn2aipnl	0.881472	4.15637e-06
Ddx27	0.881273	8.13841e-11
Pin1	0.88102	1.47982e-08
Hist1h2bg	0.879937	0.000264333
Cwc15	0.879725	0.000296305
Trmt61a	0.879531	4.8414e-06
Slc27a3	0.879429	0.0258483
Il1rap	0.879393	0.000218905
Esd	0.879275	0.000167278
Kat2a	0.87906	1.21035e-11
Cstf2	0.879047	1.57919e-09
Rnaseh2c	0.878762	5.95999e-05
Ddb1	0.878744	2.7995e-11
Hes1	0.878592	0.00139228
Mars	0.877712	2.15721e-09
Med9	0.877142	0.000737369
[truncated: 3,903 more rows]

## Sheet: (E) P-KO_vs_C-WT
GeneSymbol	log2FoldChange	padj
Ptgr1	5.52542	2.36751e-45
Tmem132e	5.32029	1.15245e-32
Bcat1	5.29377	3.92739e-54
Eps8l2	5.23025	3.94298e-20
Nt5dc2	5.21958	4.15225e-44
Uchl1	4.86527	1.25359e-35
Fstl1	4.8638	3.52665e-31
Car12	4.60477	1.99536e-20
Gm5424	4.34943	1.7743e-40
Rag1	4.30374	7.07607e-29
Ltbp4	4.30172	6.50988e-27
Nav2	4.2528	4.38687e-50
Nlgn2	4.24709	2.23058e-19
Camkv	4.17504	1.53992e-09
Akap1	4.10748	6.43896e-42
Bag2	4.05721	4.99457e-25
Ankrd13b	4.04472	1.12334e-34
Shank2	4.02141	3.96502e-17
Enpep	3.98215	1.2954e-08
Ass1	3.97928	1.06195e-43
Gal3st1	3.94958	4.70198e-10
Fut10	3.85933	8.5291e-12
Tcam1	3.83935	1.51108e-14
Olfml2b	3.80403	3.18303e-09
Rag2	3.77112	1.39504e-15
Rd3l	3.72018	2.24265e-07
Sertad4	3.70787	4.16547e-13
Gpr25	3.68844	3.79416e-08
Fabp5	3.68745	1.66891e-18
Syndig1l	3.65087	1.315e-09
Pbk	3.64701	1.96697e-18
Steap3	3.62674	6.39622e-23
Stac	3.60083	9.70799e-07
Slc16a1	3.59279	1.75555e-32
Nme4	3.59153	5.88698e-18
Rbm24	3.55263	9.53216e-10
Hspa12b	3.50869	2.72382e-19
Rsph1	3.50153	2.65724e-09
Cdca5	3.50132	7.75914e-32
Gfra1	3.47443	5.72123e-13
Ccdc85c	3.40231	2.32071e-12
Lonrf3	3.39371	1.15521e-08
Cks1b	3.38247	1.25368e-23
Atg9b	3.37007	1.18872e-07
Rpp25	3.3632	2.59433e-06
Shcbp1	3.36315	9.37914e-10
Klhl23	3.35622	1.51415e-10
Lrrn4	3.34885	2.94797e-15
Cenpv	3.34081	6.98901e-21
Ccnb1	3.33213	4.81495e-13
Depdc1b	3.31254	4.31822e-17
Gpr150	3.30858	3.67259e-06
Mis18bp1	3.28988	1.56499e-13
Sapcd2	3.28499	7.84912e-23
Ctdspl	3.27729	3.35208e-08
Evpl	3.25518	1.49097e-05
Lrr1	3.25279	2.997e-08
Ccna2	3.2492	1.01356e-14
Galnt14	3.24415	5.38089e-16
Igll1	3.24181	3.76446e-06
Alpl	3.24069	8.45346e-31
Uck2	3.2276	3.34332e-29
Bub1	3.21395	8.34755e-15
Dnph1	3.18357	5.86953e-17
2900026A02Rik	3.18078	1.65542e-45
Ttk	3.15777	8.72562e-18
Stc2	3.15613	1.63197e-05
Cdk1	3.15578	1.45054e-14
Nusap1	3.14017	5.09431e-15
Elovl6	3.13936	7.60203e-39
Cdkn2a	3.13394	1.43485e-05
Esco2	3.12653	1.68009e-11
Aunip	3.11723	2.00652e-12
Sox4	3.11276	2.42276e-37
Pcdh9	3.06483	6.33088e-07
2610318N02Rik	3.06331	4.74295e-19
C330027C09Rik	3.04467	5.81871e-14
Lamb2	3.0413	6.16581e-15
Wnk2	3.03493	2.07898e-10
Kif2c	3.03205	2.12062e-14
Tnfrsf19	3.02457	9.35266e-30
Dyrk3	3.01672	3.42892e-20
Peg12	3.01156	6.20351e-05
Enkd1	3.00632	5.88698e-18
Gm595	3.00626	1.51761e-05
Pcdhgc3	2.99619	7.3492e-17
Bub1b	2.99246	1.91175e-25
Stmn1	2.99015	1.22246e-18
Mb21d1	2.98716	2.78995e-19
Smyd2	2.97865	1.39369e-24
Anln	2.9733	1.185e-25
Cenpf	2.9708	4.18649e-19
Tpx2	2.97016	1.22206e-20
Dctpp1	2.95885	1.37339e-17
Prkar2b	2.94375	1.84326e-20
Cdca8	2.94295	4.80314e-32
Ube2c	2.93229	3.51417e-22
Kcnk1	2.92059	9.0565e-05
Tdrkh	2.91801	3.59441e-08
Asf1b	2.9158	2.32831e-17
Depdc1a	2.91263	7.26272e-08
Ccnd1	2.90679	5.73936e-19
E2f8	2.8961	9.18696e-16
Dntt	2.89295	9.16484e-05
Kif11	2.89218	2.52105e-12
Islr2	2.88983	2.83645e-11
2810417H13Rik	2.88157	1.78176e-12
Lmna	2.87719	2.19569e-11
Uhrf1	2.87704	1.13825e-19
Mlf1	2.8764	0.000193955
Tspan6	2.86862	2.47856e-05
Thbd	2.86855	5.2304e-23
Chek1	2.85917	3.10734e-09
Zik1	2.84831	2.201e-12
Cdca3	2.84744	1.18159e-11
Ncapg	2.84688	1.37548e-10
Ccnb2	2.82672	2.03115e-17
Gcat	2.82652	2.43135e-10
Pvrl3	2.82133	5.69338e-05
Ccnf	2.82077	9.04724e-20
Rrm2	2.81552	1.29048e-18
Cdc6	2.8075	2.53676e-11
Fam72a	2.79967	1.56736e-13
Fam174b	2.79912	3.29277e-06
Ptprs	2.79769	2.2374e-18
Kif14	2.79289	3.65114e-17
Sgol1	2.78178	7.93949e-17
Cenpi	2.77864	1.62939e-15
Arvcf	2.77798	5.45242e-36
Spc24	2.77228	1.69044e-16
Kif18b	2.76343	6.93154e-14
Rcor2	2.75833	1.70557e-21
Foxf2	2.74076	0.00047046
Gins1	2.73461	4.13018e-11
Bahcc1	2.73134	3.66204e-05
Espl1	2.73009	3.70182e-14
Spc25	2.72936	2.53577e-08
Mt1	2.72688	4.50941e-06
Ltf	2.71438	4.46591e-05
Nespas	2.71102	3.04699e-22
Plxdc1	2.70854	2.03817e-09
Zfp105	2.69567	1.04926e-06
Birc5	2.6946	1.87177e-25
Gsto1	2.69397	1.5736e-21
9330182L06Rik	2.68958	0.000344622
Mcm10	2.68426	9.86264e-16
Padi4	2.68138	3.21488e-08
Aurkb	2.67764	9.79434e-29
Lgals1	2.67645	6.65656e-11
Trim16	2.67397	4.57561e-15
Ccne2	2.67386	1.05333e-10
Cdc20	2.66254	2.40264e-15
Dctd	2.65958	2.96265e-22
Hist1h2ah	2.65937	1.0981e-07
Aspm	2.65814	1.70776e-10
Ckap2l	2.65535	1.11586e-12
Kif20a	2.6551	4.39481e-18
Cdkn1c	2.65474	4.45167e-07
Slc35f2	2.65294	3.13678e-18
Nr1d1	2.65242	8.6552e-16
Cth	2.65119	0.000112801
Lgr5	2.64903	1.5736e-21
Crnde	2.64712	4.76104e-05
BC030867	2.64385	1.9532e-13
Syce2	2.64212	1.49054e-13
Fam195a	2.64158	1.12827e-07
Top2a	2.63926	1.73061e-09
Ckap2	2.63778	1.33144e-09
Ninl	2.62525	7.53989e-06
Timm8a1	2.62388	7.38608e-11
Cldn4	2.61747	0.00094224
S100a6	2.6117	8.3814e-10
Cks2	2.61164	2.89364e-08
Cplx2	2.60719	1.76913e-71
Gins2	2.60381	3.27361e-13
Exo1	2.59801	6.52042e-25
Neto2	2.59747	1.56499e-13
Kif15	2.59498	1.4188e-18
Epha2	2.59077	1.92334e-08
Hist1h1b	2.58906	2.68874e-10
Gmnn	2.58814	5.41552e-13
Ercc6l	2.58558	5.88579e-13
Nuf2	2.58353	3.30727e-09
Hells	2.57173	6.553e-16
Srl	2.56962	8.42323e-13
Plk1	2.56864	1.03082e-25
Cenph	2.56835	2.33282e-08
E130012A19Rik	2.56644	6.20321e-13
Thop1	2.56223	1.10694e-19
Trim2	2.55967	3.68397e-13
Gtse1	2.55173	2.67553e-10
Mex3a	2.54526	9.2411e-20
Insm1	2.54483	7.34919e-05
Kif7	2.54386	0.000132261
Asns	2.541	1.06049e-08
Slc47a1	2.5388	0.00138194
Akap12	2.53348	2.0901e-61
Kif4	2.53254	4.68141e-13
Cdc45	2.53041	2.99414e-19
Stil	2.52955	6.21534e-10
Igsf3	2.52863	0.000580817
Casc5	2.52747	1.82167e-12
Aurka	2.52645	2.66865e-20
Psat1	2.52574	2.76435e-20
Sgol2a	2.52538	1.09653e-09
C230035I16Rik	2.52451	0.000104421
Fhod3	2.5147	8.00733e-08
Zfp428	2.51453	2.59899e-12
Zfp521	2.50965	1.14264e-06
Hist1h3g	2.50574	4.31099e-07
Serf1	2.50556	1.51059e-05
Abhd14a	2.50527	1.57587e-16
Fignl1	2.50312	1.91571e-09
Pxylp1	2.50301	1.27672e-09
Ankle1	2.50014	2.57069e-16
Ncapg2	2.49968	4.6442e-12
Gas2l3	2.4927	5.46984e-13
Cdca7l	2.49153	1.34384e-27
1110032F04Rik	2.48941	0.00138012
9430020K01Rik	2.48806	3.87261e-18
Bst1	2.48663	7.55214e-10
Cep55	2.48621	2.0797e-08
Ticrr	2.48464	1.94326e-11
Dtl	2.48165	1.15878e-13
Oaf	2.47882	2.02382e-05
C1ql1	2.47875	0.00133363
Tmem41a	2.47302	4.59824e-10
Sox12	2.47248	2.22919e-17
Ncs1	2.47006	7.13102e-07
Crmp1	2.46572	9.36132e-05
Srm	2.46375	1.90872e-34
Trip13	2.4637	6.59896e-14
Pm20d2	2.46368	0.000212006
Fam83d	2.46022	6.28657e-12
Lhpp	2.4589	9.27732e-11
Ddias	2.45831	2.07228e-09
Kel	2.45744	0.00118116
Spag5	2.45717	3.67305e-09
Myl4	2.45351	1.68835e-09
Pif1	2.45206	1.33839e-12
Tmem107	2.44828	3.13246e-07
Fzd9	2.4472	3.23332e-06
Cdca7	2.4456	7.37862e-25
Cenpk	2.4442	1.56165e-08
Ncaph	2.43831	8.56381e-21
Rasl10a	2.43815	4.90631e-05
Ect2	2.43534	1.35725e-13
Ska1	2.43471	2.504e-07
Pinlyp	2.42661	0.000914561
Tmem97	2.42603	1.39742e-15
Acot7	2.42595	7.57074e-11
Ngp	2.41033	7.69145e-05
Prr11	2.40913	2.19125e-10
Slc1a4	2.40567	1.69026e-08
Mnd1	2.40386	5.70586e-05
Clspn	2.39779	4.98578e-16
Nudcd2	2.39609	4.35143e-10
Nek2	2.394	6.66666e-08
Hist1h3b	2.38994	7.41877e-06
Slc29a1	2.38918	4.75159e-30
Knstrn	2.3891	3.12513e-13
Dlgap5	2.38479	4.41471e-17
Pcsk4	2.38325	5.41428e-10
Tfdp1	2.38183	5.62888e-17
Cdkn1a	2.38017	3.42887e-05
Wfdc21	2.3793	4.60992e-07
Parpbp	2.37416	4.59268e-11
Recql4	2.37106	1.71955e-23
Sorcs2	2.36434	1.81984e-17
Endog	2.36323	6.77358e-10
Fam64a	2.36091	4.58389e-08
Lrfn4	2.35749	1.84039e-05
Diras2	2.35526	2.23085e-34
Tcf19	2.35036	1.04515e-11
Fancd2	2.34939	8.05806e-09
Lrig3	2.34882	0.000317115
Cbx2	2.34376	9.33659e-19
Slc34a1	2.34373	4.86957e-05
S100a9	2.33963	3.69089e-05
Padi3	2.33922	1.03208e-05
Myb	2.33711	7.66915e-23
Gpr128	2.3334	0.00309023
Nefh	2.33339	1.00464e-05
Paqr4	2.32941	1.36255e-10
Kntc1	2.32875	2.44317e-19
Mybl2	2.32846	3.15194e-19
Rad51	2.32698	1.97843e-16
Prss57	2.32553	0.00380546
Rps27l	2.31994	1.39176e-06
4930503E24Rik	2.31324	8.25323e-06
Mcf2l	2.30851	1.01115e-05
Aqp1	2.30705	0.000134626
Kif22	2.30276	4.71129e-21
Cdkn2c	2.29538	2.23502e-10
Troap	2.28854	7.75586e-08
Pask	2.28825	1.63513e-11
Usmg5	2.28685	1.55034e-06
Mei4	2.28128	2.77e-08
Bdh1	2.27975	1.01365e-12
Fbxo5	2.27815	1.49054e-13
Psrc1	2.27815	6.18265e-07
Tmem205	2.2747	0.000920847
S100a8	2.26826	0.000118092
Zfp704	2.26733	8.52931e-12
Grip1	2.2626	0.000129682
Hist1h2bp	2.25308	1.12477e-06
Ppa1	2.25197	3.13684e-11
Cuedc1	2.25149	1.73621e-11
Smc2	2.24666	1.05333e-10
Zwilch	2.246	1.56622e-10
Gm13051	2.24353	0.00194345
Sestd1	2.24126	0.000158744
Sema3g	2.23725	5.03319e-07
Ctxn1	2.23443	0.00209869
Ydjc	2.23407	1.01831e-23
Aspn	2.23318	2.86005e-05
Spire1	2.23175	1.10286e-07
Cenpm	2.23151	6.28657e-12
Galk1	2.22988	9.79852e-13
6030408B16Rik	2.22464	0.000172893
Hist1h2bl	2.21748	6.56121e-07
Dab2ip	2.21686	4.96313e-18
2010204K13Rik	2.21613	8.17342e-06
Prkar2a	2.21475	1.25453e-20
Hist1h4n	2.21229	0.00137966
Snrpf	2.20862	3.35346e-11
Tmem98	2.20621	0.00437122
Ddn	2.20501	0.00195084
Brip1	2.20425	9.29694e-13
Usp44	2.20111	1.33325e-05
Cenpn	2.1951	3.9393e-07
Cenpe	2.19486	1.55451e-11
Gm6682	2.19392	1.31988e-05
Mad2l1	2.19163	4.15306e-08
Tiam1	2.19111	1.22498e-15
Hist1h3d	2.1853	1.42565e-07
AI854703	2.18505	0.000184226
1110038B12Rik	2.1828	2.1947e-22
Garem	2.18226	0.00716905
Chchd10	2.17734	8.19045e-17
Sh2d5	2.1746	0.00187205
Hist3h2ba	2.17456	3.864e-08
Lgalsl	2.17314	7.90917e-08
Pard6g	2.17066	1.52609e-08
Pdlim1	2.16829	8.17923e-36
Ppp1r26	2.16771	3.69537e-06
Tmem158	2.1604	0.00352646
Gm6222	2.15986	0.00112032
3110082I17Rik	2.15845	6.25022e-10
Dhfr	2.15611	2.16685e-08
Kif18a	2.15272	7.95088e-08
Hmmr	2.15246	1.42558e-07
Hist1h2ae	2.14954	1.60255e-06
Myc	2.14764	7.82503e-22
Prim1	2.14473	4.58314e-11
Fancd2os	2.14118	0.00233286
Ece2	2.14086	3.51368e-13
Hist1h2af	2.13916	1.34813e-05
Snrpd1	2.13536	1.53668e-09
Cdca2	2.13333	8.71444e-10
Ehd2	2.13089	1.76121e-24
Socs2	2.13077	0.000282002
Celsr2	2.12553	2.48036e-06
Hist1h2bh	2.12222	7.45768e-06
Adk	2.1219	2.74116e-14
Nhp2	2.11969	6.60957e-11
Ndufb6	2.11428	2.4144e-10
Hist1h4b	2.11214	2.42914e-06
Gfod1	2.11195	3.40273e-21
C1qbp	2.11187	9.66461e-20
Rad51ap1	2.1058	2.7396e-14
Siah1b	2.10578	1.37973e-06
Tal1	2.10558	0.00586708
E2f7	2.10409	3.57577e-11
Kif23	2.10272	1.04463e-10
Impa2	2.10213	2.00763e-14
Ncapd2	2.10016	2.60642e-19
Phpt1	2.0982	7.15638e-12
Ybx3	2.09025	4.83661e-27
Lsm5	2.08964	2.29045e-05
Gen1	2.08856	3.8149e-09
Tifa	2.0868	3.2877e-09
Col25a1	2.08649	0.00952102
Siglec15	2.08625	0.000102678
Prc1	2.08509	1.36904e-10
Shmt1	2.08182	2.64594e-24
Gpam	2.07888	3.59274e-34
Eme1	2.07764	1.29002e-12
Rpa3	2.07749	2.0713e-05
Stox2	2.07373	0.000344357
Tbc1d2	2.07263	1.12478e-08
H2afx	2.06837	1.16642e-09
Cdc25c	2.06758	2.05797e-05
Lig1	2.06668	4.18649e-19
Ppp1r14b	2.06609	2.19038e-18
Xylb	2.06589	5.26376e-06
Hist1h2ab	2.06549	2.95856e-05
Arhgdig	2.06534	0.007904
Mcm6	2.0647	1.55198e-20
Eid2	2.06223	0.00300363
Gfi1b	2.05939	0.00534015
Add2	2.05608	0.00415024
Tfrc	2.05391	1.96779e-08
Sox8	2.04584	0.00856542
Acacb	2.04001	0.00250641
AI427809	2.03485	0.00119559
Ccdc57	2.03375	6.1243e-07
Kpna2	2.0303	9.32335e-08
Mastl	2.03023	7.36839e-07
Rrm1	2.02961	4.70522e-11
Chaf1a	2.02593	3.16869e-25
Ung	2.02291	7.4887e-14
Hist1h3h	2.02256	9.92352e-06
Foxo6	2.0194	0.0123663
Hist1h2bm	2.0177	2.09361e-05
Palm	2.01494	1.61937e-14
Selenbp1	2.01293	1.52126e-07
Chst7	2.01164	6.74505e-09
Rcc1	2.00982	4.78464e-21
Xkr5	2.00813	0.000202361
Rem2	2.00435	0.00117304
Tipin	2.00418	5.47325e-08
Lysmd2	2.00133	2.16861e-05
Hist1h2bk	1.99967	1.5709e-05
Pold2	1.99787	1.58417e-17
Gcsh	1.99647	1.87154e-10
Pkhd1l1	1.99336	0.00300938
Nacc2	1.99328	3.39476e-13
Nup37	1.99147	2.76824e-06
Hist1h4a	1.98947	7.28691e-05
Foxm1	1.98792	9.39545e-13
Mki67	1.9816	4.4178e-06
Wee1	1.98129	1.19812e-12
Bzw2	1.9807	7.99347e-12
Col5a3	1.97694	3.22622e-06
Racgap1	1.97503	1.44581e-19
Arsi	1.9721	0.0150759
Sap30	1.96755	8.71444e-10
Rad54l	1.96534	1.08022e-17
Dleu7	1.96376	0.0132826
Hdgf	1.95837	9.94854e-27
Fmn2	1.95689	0.000115615
Mtfr2	1.95642	4.71815e-07
Rab3b	1.95497	0.0150621
Pipox	1.95064	9.09625e-06
Luzp1	1.94812	1.48567e-14
Ska3	1.948	1.247e-11
Nat8l	1.94607	1.26504e-06
Mrpl12	1.94492	7.17951e-07
Hmgn5	1.94371	2.69478e-05
Trim58	1.94337	0.0159945
Hist1h2bj	1.94273	5.46311e-05
Ahcy	1.94265	4.53155e-11
Pafah1b3	1.94136	1.46565e-09
Mthfd2	1.941	7.62219e-17
Cldn10	1.94055	6.39721e-05
Ranbp1	1.93977	2.42536e-10
Rtkn2	1.93929	2.63168e-07
Chtf18	1.93759	1.90374e-19
Rfc4	1.93698	2.20651e-09
Tpi1	1.93363	2.73435e-09
Hist3h2bb-ps	1.93174	5.79494e-06
Pcdhgc5	1.93131	0.000286163
Traip	1.92785	1.18845e-10
Bambi	1.9258	0.00028644
Timm50	1.92495	2.7785e-25
Orc6	1.92398	5.32e-07
Tjp2	1.92211	2.47642e-09
Snhg3	1.92111	5.03251e-07
Hist1h2ag	1.92021	0.000421476
Hist2h4	1.91857	3.19731e-06
Vegfa	1.91838	8.45294e-08
Dhrs13	1.91677	2.96984e-05
Chchd6	1.91661	0.000511237
Iqgap3	1.9117	1.53702e-13
Nolc1	1.91142	6.98901e-21
Il33	1.91114	0.0134098
Gpsm2	1.91054	1.58878e-10
Oip5	1.91018	1.15437e-07
Tomm5	1.90933	5.91299e-08
Psmc3ip	1.90337	1.60417e-09
Hist1h1a	1.9029	2.04903e-05
Mcm2	1.90204	6.1497e-15
Thyn1	1.9014	5.08039e-06
Dlk1	1.90094	0.0203582
Npm3-ps1	1.90091	0.000129284
Pmm1	1.89973	5.94251e-12
Nudt4	1.89712	1.88919e-18
Oaz3	1.8966	0.00955612
Hmga1	1.89513	8.19045e-17
Sord	1.89494	1.52318e-11
Magoh	1.89125	9.07355e-07
Arpp21	1.88672	0.00670524
Mif	1.88655	2.40013e-10
Mcm7	1.88619	1.43491e-11
Phlda3	1.88334	0.00194526
Ube2t	1.88299	6.18265e-07
Ap1s1	1.8825	1.41271e-07
Mxd3	1.88237	5.56642e-09
Lmnb1	1.88024	8.81085e-18
Nfix	1.87931	2.54419e-08
Ndc80	1.87719	4.98924e-11
Gemin6	1.87538	4.78415e-07
Incenp	1.87523	1.89483e-11
Ogn	1.87232	3.149e-05
Zcchc3	1.87118	3.11739e-09
Hist1h2ak	1.86966	1.4348e-05
Scarf2	1.86818	0.0126683
Kbtbd12	1.86774	0.00470999
Capsl	1.86478	0.00904471
Hist1h4j	1.8644	6.94004e-05
Vamp7	1.86328	7.49315e-05
Erh	1.86318	1.36119e-13
Gpx7	1.86272	0.00821987
A430105I19Rik	1.86215	0.000250741
0610009B22Rik	1.86201	0.000684153
Lcn2	1.85696	0.016451
Kis2	1.85636	0.000343125
Slc43a3	1.85523	9.94294e-09
Hist1h3c	1.85291	0.000213596
Bard1	1.85202	7.43542e-15
Dio2	1.84982	0.0201221
Chchd1	1.84958	7.31375e-06
Txn1	1.84949	4.74398e-06
Lmnb2	1.84791	5.86742e-22
Gm561	1.84784	0.000159264
Ndufs6	1.84716	9.20325e-14
Hist1h3i	1.84488	9.73933e-05
Gsg2	1.84267	8.09623e-17
Zfp286	1.84193	2.56905e-06
Dbi	1.84046	8.16925e-07
Mcm5	1.84029	1.77705e-08
Cit	1.83615	6.03339e-07
Tubb2b	1.83417	2.34978e-07
Pole3	1.83181	6.17071e-07
Trim37	1.8306	5.30548e-12
Thbs1	1.83046	0.00931434
Hist1h4k	1.83038	0.000219034
Dhcr24	1.83026	4.2784e-10
Prodh	1.82189	2.93448e-09
Spef1	1.82142	1.74546e-05
Smoc1	1.81955	0.000906831
Tmprss3	1.81943	0.00653949
Dkkl1	1.81894	0.00169407
Igsf8	1.81817	7.18855e-22
Prps1	1.81743	6.37984e-09
Arhgap29	1.81444	0.000138755
Slc19a1	1.81281	8.93637e-15
Cenpp	1.8117	6.84529e-05
Cacybp	1.8116	4.41728e-06
Dusp9	1.81047	0.0227335
Angptl4	1.80949	1.74371e-05
Mtfp1	1.80917	2.42748e-05
Rangrf	1.80802	1.59748e-08
Ipo5	1.8071	7.86733e-16
Chchd4	1.80642	7.41202e-10
Tfap4	1.80559	8.15283e-15
Emp1	1.8055	0.0198051
Csrp2	1.80519	8.36804e-10
Nsl1	1.80272	2.03364e-15
Eif1ax	1.80037	3.8585e-06
Gnat2	1.79795	0.0104342
Phgdh	1.79682	7.26554e-12
Slc7a5	1.7955	5.94251e-12
Eps8	1.79289	4.21867e-07
Hspa2	1.79286	9.51532e-10
Isl1	1.79254	0.0289256
Sfxn1	1.79206	1.3728e-13
E2f6	1.78936	1.58778e-13
Hspd1	1.78839	4.77238e-10
Mmp14	1.7869	0.00245589
Egfl6	1.78643	8.69055e-05
Tnni2	1.786	3.94622e-05
Ank1	1.78499	0.00865183
Brca1	1.78342	1.09681e-09
Hist1h2an	1.78307	0.000443176
Rad54b	1.78144	6.59171e-12
Pla2g4c	1.77911	0.000692884
Mrpl34	1.77899	2.14378e-11
Shmt2	1.77753	7.46491e-17
Banf1	1.77595	6.553e-16
Lipt2	1.77368	0.000153768
Ryk	1.77362	0.000510598
Smco4	1.77334	1.03689e-07
Dut	1.77024	1.55869e-08
Ctps	1.76867	8.96126e-25
Ndufa12	1.76525	4.46998e-06
Pole	1.76209	3.98376e-10
Gm5124	1.76161	0.00541743
Acvr2b	1.76103	0.00693839
Rabl2	1.7606	0.000230904
Nrxn2	1.75934	6.62495e-05
Nmral1	1.75879	1.83667e-09
Rai14	1.75585	0.0116995
Alyref	1.75447	4.02837e-08
Car1	1.75274	0.0282943
Mcm3	1.75074	1.03407e-13
Mns1	1.74979	1.0853e-06
Zfp820	1.74937	0.0244171
Gpr12	1.74853	0.0343828
Guca1a	1.74746	0.0297411
Bola1	1.74736	2.05603e-08
Lekr1	1.74694	0.00538462
Rpf2	1.74627	1.4427e-06
Tmem238	1.74557	3.43168e-09
Fam171a1	1.74542	0.00953596
Rtn4rl1	1.7428	0.00877465
Crls1	1.74189	6.48109e-06
Dpy30	1.7394	6.59835e-08
Polq	1.73835	4.38378e-14
Diap3	1.73559	2.88874e-09
Hist2h3c2	1.73394	0.000262149
Gm5803	1.73126	4.08295e-06
Cdkn2b	1.73082	0.0113769
Mthfd1	1.73019	1.25959e-18
Amdhd1	1.73005	0.0315465
Ren2	1.72816	0.0362942
Cbx5	1.72673	1.36694e-10
Lap3	1.72627	1.98132e-11
Magi1	1.72547	0.00978783
Hmgn2	1.72293	6.57756e-07
Ccdc34	1.72075	2.36967e-05
Zkscan16	1.72062	7.76166e-06
Paics	1.7193	2.89218e-07
H2afz	1.7174	0.00031296
Ndufc2	1.71662	9.22329e-05
4930579G24Rik	1.7156	4.49819e-07
Otub2	1.71495	3.48275e-20
Ccdc124	1.71282	1.81452e-12
Mcm4	1.71088	4.3838e-12
Rnf113a1	1.70966	0.000116147
Dbf4	1.70961	4.72358e-07
Uchl5	1.70907	4.00636e-09
Fam228b	1.70892	0.0019528
Cbr3	1.70884	0.0281732
Ptk2	1.70743	4.33123e-14
Coq7	1.70581	6.95435e-09
Rcl1	1.70543	1.58778e-13
Ppat	1.70488	4.00636e-09
Camk2n2	1.7044	0.00352345
Tacc3	1.70015	7.41895e-10
Cbx3	1.69963	4.92483e-05
Idh3a	1.69882	1.28615e-10
Hmgcll1	1.69713	3.86488e-06
Cdkn3	1.69446	2.87548e-06
Pter	1.69369	0.00503361
Zfp114	1.69327	0.0278135
C1d	1.68969	0.000499339
Hist1h2ai	1.68761	1.86565e-05
Park7	1.68692	1.92432e-12
Atp10a	1.68689	1.59308e-08
Cd320	1.6864	3.80509e-07
Atad5	1.68532	3.25466e-10
Tyms-ps	1.68442	0.00635575
Nop16	1.68271	5.41552e-13
Nifk	1.68183	5.39722e-08
Cntln	1.68053	1.77787e-07
Pus7	1.67938	1.43046e-17
Ezh2	1.67776	3.31386e-16
Clns1a	1.67659	1.03377e-15
Lyar	1.67652	2.60489e-14
Uqcrq	1.67185	2.56973e-06
Nasp	1.66885	5.36099e-09
1110004E09Rik	1.66842	1.18785e-05
Cpne2	1.66741	0.00876227
Eif4ebp1	1.66722	2.4499e-11
Fen1	1.66631	1.1797e-05
Cacna2d1	1.66517	0.0205123
Ndufc1	1.66387	7.42373e-06
Naa38	1.66372	0.000212741
Elof1	1.66322	1.29961e-07
Dmtn	1.663	0.0412336
Mtx2	1.66191	1.6816e-05
Heyl	1.66101	0.0261218
Pcdhgc4	1.65982	0.000724466
Ruvbl1	1.65912	8.00349e-14
Bsn	1.65857	1.79226e-11
Ifitm1	1.65737	0.0454918
2010107E04Rik	1.65392	2.23001e-05
Dek	1.65315	6.02835e-06
Idh2	1.65247	7.00552e-17
Cox7b	1.65246	0.000147284
Ide	1.65199	5.83399e-19
Pemt	1.6513	0.00989332
Agpat5	1.64887	2.29841e-15
Pfdn6	1.64857	2.40264e-15
Hist2h3b	1.6468	0.00069804
S100a4	1.64584	0.00255951
Tagln2	1.64484	2.2307e-10
Sf3b5	1.64476	1.46723e-08
Pcna	1.64374	3.83502e-05
Cysltr1	1.63993	0.0281732
Metrn	1.63903	1.0914e-08
Spdl1	1.6386	4.37665e-09
C1qtnf4	1.63856	0.0365395
Slc25a13	1.63787	9.44687e-07
Gm12070	1.63738	5.12973e-05
Arhgap19	1.63736	4.76706e-08
Efna4	1.63617	0.0497165
Hirip3	1.63467	2.44317e-19
Fbl	1.63457	2.74422e-16
Reep6	1.63449	0.0423198
Got2	1.63196	1.36119e-13
Fam136a	1.6307	7.23433e-07
Oscp1	1.63044	0.0313984
Ruvbl2	1.62947	4.98062e-18
Pmf1	1.62891	4.34755e-10
Hist1h2bf	1.62878	7.01421e-05
Umps	1.62874	8.09623e-17
Snord52	1.62831	0.00764342
Atp5j	1.62593	2.67867e-07
Hist1h4i	1.62563	6.31143e-05
Prmt5	1.62518	2.37216e-22
Strap	1.6249	1.86907e-06
Zfp184	1.61949	0.000538024
Atic	1.61869	3.80688e-15
Ska2	1.61846	4.71815e-07
Gcgr	1.61554	0.0244304
Anp32e	1.61487	4.76203e-16
Hprt	1.61465	3.54781e-07
Mir1949	1.61285	5.78339e-07
Cetn3	1.61254	5.14443e-05
Ccdc40	1.61146	0.0142056
Kif20b	1.60942	9.31684e-09
Hist1h4f	1.60924	0.00119402
Awat2	1.60797	0.0426838
Arhgap11a	1.60779	1.95627e-19
Cdc42ep3	1.60624	4.25897e-06
Mrps36	1.60559	1.62589e-07
Hist1h2ac	1.60475	9.04424e-05
Plscr3	1.60445	2.12174e-08
Adarb1	1.60404	1.33144e-09
Slc39a8	1.60366	7.0499e-05
Cycs	1.60356	0.000117919
Nkpd1	1.60123	0.035806
Pgk1	1.60062	2.73572e-07
Bok	1.59991	0.0320718
Plcb4	1.59845	0.00643587
Mrpl50	1.59761	5.98644e-08
Tln2	1.59737	0.000148887
Atox1	1.59369	0.000134633
Atpif1	1.59349	7.24557e-06
Lsm2	1.59317	1.93068e-09
Haus4	1.59245	3.04832e-13
Ola1	1.58997	2.0488e-12
Rsph9	1.5895	0.000961375
Snhg1	1.58908	1.33955e-06
Gart	1.58852	1.41098e-17
Tyms	1.5882	6.4885e-11
Rsl1d1	1.58816	2.25698e-08
Blm	1.58743	4.58314e-11
Nop10	1.58678	9.40521e-05
Psmg3	1.58629	3.17111e-10
Pola1	1.5855	4.74136e-07
Tceb1	1.58405	0.000356928
Ldha	1.58383	4.94535e-07
Ptges3	1.58377	1.52944e-05
Tbx19	1.58338	0.0355196
Cox5a	1.58245	3.28535e-10
Mpp3	1.57989	0.000594807
Sptssa	1.57742	3.42887e-05
Tmem100	1.57701	0.0187485
Cav2	1.57682	0.00975197
Ccdc18	1.57527	6.21664e-05
Nutf2	1.57483	1.46804e-08
Fkbp4	1.57261	5.36947e-13
Fam53b	1.57109	3.89055e-20
Kbtbd6	1.56965	0.000508992
1700030J22Rik	1.56961	0.0455509
Lancl2	1.56804	1.45695e-08
Thg1l	1.56741	5.05377e-09
Kcnn4	1.56716	1.08981e-10
Nudc	1.56703	2.08447e-19
Mbnl3	1.56519	1.10915e-06
Mrps33	1.56344	0.000208531
Snord47	1.56139	0.0329455
Hist4h4	1.55984	0.000841069
Slmo2	1.55891	4.25723e-09
Melk	1.55859	0.000220572
Bbc3	1.55857	3.95537e-05
Ppil1	1.55837	1.31185e-13
Prim2	1.55759	5.06205e-08
Hk2	1.55676	7.62219e-17
Xkr6	1.5512	0.0329149
Cox7a2	1.55111	0.000291466
Ndufa8	1.54963	2.21798e-08
Cfdp1	1.54923	4.78415e-07
Ptpmt1	1.54918	2.31306e-09
St5	1.54788	6.44176e-06
E2f1	1.54361	3.35258e-08
Atp5g1	1.5428	5.96333e-06
Wfikkn2	1.54217	0.0105878
Sephs2	1.54048	3.37919e-09
Nme1	1.53951	5.6154e-06
Tifab	1.53768	3.05421e-05
Lsm3	1.53729	0.000226388
Echdc2	1.53686	0.0348058
Camk2a	1.53457	0.000213282
Cmc2	1.53372	0.000115876
Mrpl36	1.5329	2.8009e-08
Rrp1b	1.53176	8.32706e-18
Chaf1b	1.53116	7.32355e-11
Pbdc1	1.52865	1.37402e-05
E2f2	1.5276	4.13955e-17
Ccdc116	1.52739	0.000175839
Pno1	1.5271	1.01188e-06
Tuba1b	1.52625	0.000154642
Hist1h2bn	1.52562	0.00134001
Ube2s	1.52525	3.08881e-07
AA465934	1.52461	0.00831976
Alms1	1.52338	1.23797e-10
B430212C06Rik	1.52045	0.00310142
Snrpa1	1.51824	2.98848e-09
Nedd4	1.5175	9.79434e-29
Xrcc6	1.5158	1.81452e-12
Uqcr11	1.5146	1.54371e-05
Usp1	1.51373	6.47149e-07
Pa2g4	1.51344	8.34533e-09
Pole2	1.50881	7.39962e-05
Rbbp7	1.50805	4.92596e-09
Siva1	1.50689	8.1821e-06
Slc25a4	1.50589	3.78724e-08
Zfpm1	1.50517	7.57832e-12
Nop58	1.50455	7.25814e-06
Prdx6	1.50251	4.28328e-11
Psmd7	1.50179	4.05214e-09
Atp5k	1.50097	1.94457e-05
Gyk	1.4991	7.34989e-05
Plk4	1.49768	2.42039e-06
Tkt	1.49735	2.99028e-08
Casp3	1.49681	2.60049e-05
Cby1	1.49652	2.50268e-05
Acy1	1.49507	2.7288e-11
Exosc6	1.49321	3.5202e-10
Eef1e1	1.48596	1.42565e-07
Zfp647	1.48572	0.000424109
Hist2h2ab	1.48517	0.000247805
Krt10	1.48407	0.00865927
Sdhd	1.48269	7.8907e-05
Mrto4	1.48266	3.16647e-14
Npm3	1.48206	1.03307e-06
Cox17	1.48128	2.07786e-05
Mxi1	1.48091	3.17111e-10
Anapc13	1.47939	7.82609e-07
Got1	1.47883	1.08752e-12
Naf1	1.47824	1.3316e-08
Tuba1c	1.47668	0.000262149
Mzt2	1.47636	8.22639e-05
Nup62	1.4749	1.11374e-11
Swi5	1.47489	2.63168e-07
Fam162a	1.47431	3.58869e-06
Mgst1	1.47413	0.0010129
Dkc1	1.4725	2.27452e-11
Hist2h2bb	1.47099	0.00153009
Spta1	1.47013	0.0336111
Coa6	1.46989	0.000813367
Wbp5	1.46903	0.00602886
Tma16	1.46898	1.93711e-08
Pfdn4	1.46891	0.000497335
Ube2cbp	1.46877	0.000162127
Snrpb2	1.46819	0.00029346
Glrx5	1.4673	4.67976e-05
Cd3eap	1.46705	2.9108e-10
5730408K05Rik	1.4667	0.0013954
Atad2	1.46664	1.47541e-10
Mrpl20	1.46392	4.99019e-06
Klhl22	1.46237	4.31232e-06
Myadml2	1.46064	0.0031411
Eif1a	1.46054	1.64196e-05
Atp5o	1.46007	6.49121e-06
Ndufa1	1.45963	0.000222116
Ube2e3	1.45932	9.38569e-05
Fkbp11	1.45902	0.000539463
Ccbl2	1.4574	5.11251e-06
Psmb5	1.45709	9.77679e-08
Pxmp2	1.45636	0.017723
Atp5g3	1.45525	4.09218e-06
Hmgb2	1.45354	0.000147328
Mgst3	1.45018	0.00486268
Wdr12	1.44931	1.21428e-16
Wdr60	1.44875	0.00410407
Sec61g	1.44834	0.000315873
Fgf11	1.44828	0.0248227
Ndufb4	1.44826	0.000188336
Ndufaf4	1.44794	2.07838e-05
Dancr	1.44789	4.09382e-06
Ifrd2	1.44728	1.03168e-13
Mrps28	1.44484	2.51454e-06
Abcb6	1.44375	1.44177e-07
1700037H04Rik	1.44358	8.47951e-10
Nucks1	1.44205	1.02817e-05
Hist1h2bb	1.44182	0.00197861
Marveld1	1.44114	0.000587767
Mrpl18	1.43991	9.12594e-06
Setd8	1.43904	7.16882e-17
Bcap29	1.4382	0.000108427
Gm5088	1.43785	2.01813e-08
2410016O06Rik	1.43679	1.77846e-14
Hist1h3a	1.43508	0.000448945
Eif2s1	1.43468	2.35301e-05
Ngfrap1	1.43452	5.57084e-05
Ndufa4	1.4306	0.000353349
Fancb	1.42894	0.00208128
Hist1h1t	1.42869	0.0394993
Hspa12a	1.42625	0.000822662
Slco4a1	1.42581	4.90966e-05
Rad51b	1.42492	0.000143282
Eif2b1	1.42282	6.18712e-10
Vpreb3	1.42274	1.38945e-06
Rnf26	1.42185	4.22311e-16
Tex30	1.41888	9.26e-05
Hspe1	1.41564	0.000231481
Impdh2	1.41562	4.68518e-09
Uqcc2	1.41507	1.31011e-09
Lrrc59	1.41482	6.35482e-20
Zfp41	1.41314	1.10838e-07
Gas2l1	1.41065	0.0103255
Pate2	1.4098	0.049678
Cox6c	1.40948	0.00145082
Glrx3	1.40916	1.40404e-05
Timeless	1.40847	7.9193e-07
Glrx	1.40794	0.000207773
Thoc6	1.40743	3.61438e-10
Polr3k	1.40661	8.90608e-05
Ttll12	1.40622	4.19215e-11
Zfp808	1.40471	0.00810192
Mis18a	1.40446	0.000138755
Polr2f	1.40412	1.06464e-07
Rnaseh2b	1.40337	5.36165e-07
Tufm	1.40236	1.01298e-14
Cecr2	1.40097	3.56909e-07
Ran	1.40013	1.88451e-05
Med21	1.39994	0.00865927
Prps2	1.39985	5.276e-07
Fkbp3	1.39896	9.1836e-05
Sptb	1.39879	0.00909392
Hint1	1.39838	2.49341e-05
Cdk4	1.39723	1.41232e-06
Anxa2	1.39666	0.000564363
Snrpa	1.39636	1.23908e-12
Fzd6	1.39509	0.0106181
Cd93	1.39492	5.38212e-09
Zmynd19	1.39445	5.71904e-08
Tceal8	1.39429	0.0280957
Znrf3	1.39406	2.58612e-10
Ndufb5	1.39347	4.67777e-05
Apoo	1.39282	0.0139049
Rrs1	1.39221	1.14773e-05
Cdc25a	1.39197	9.68012e-14
Pfas	1.39195	1.57238e-14
Zfp623	1.3916	2.32758e-06
l7Rn6	1.39115	3.66716e-05
Sae1	1.39063	4.96313e-18
Tmem255a	1.39051	1.52142e-05
Mfge8	1.39022	4.28058e-08
Sod1	1.38914	4.18205e-05
Phb	1.38851	1.91315e-06
2810025M15Rik	1.388	0.000103761
Tubb4b	1.38685	2.71964e-05
Fads1	1.38677	0.000117919
Ppan	1.38585	3.44061e-19
1700021F05Rik	1.38504	0.000285595
Hist2h2ac	1.38502	0.000539932
Nsun2	1.38457	1.42954e-17
Polr2h	1.38233	4.97191e-05
Rapgefl1	1.38065	2.64591e-05
Zc3hav1l	1.37948	2.98102e-05
Fahd1	1.37927	6.85246e-05
Lsm8	1.37809	0.00238455
Psmd8	1.37781	7.43463e-06
Kars	1.37719	3.00815e-18
Prdx3	1.37507	6.892e-05
Srd5a1	1.37487	0.0022776
Cdc34	1.37483	1.93681e-13
Snrpc	1.37457	6.12594e-06
Mettl9	1.37394	1.95933e-07
Klf9	1.37349	2.06392e-10
Cenpa	1.3728	1.71686e-05
Cad	1.37273	2.60308e-27
Nob1	1.37266	2.90464e-06
Nxt1	1.37162	0.000120184
Frmd7	1.37155	0.0206919
Tubb1	1.37146	0.0498249
Gfi1	1.37031	7.40709e-06
Dgcr6	1.36879	2.04954e-06
Prdx1	1.36595	0.000895135
Txnl1	1.36567	3.54578e-05
Pusl1	1.3654	1.46531e-08
Ypel2	1.36493	1.82933e-08
Usp14	1.3648	1.13126e-05
Eif2b2	1.36359	3.86554e-08
Psmb3	1.36324	0.00012848
Pebp1	1.36195	2.86232e-06
1500011K16Rik	1.36134	0.000988331
Tmem70	1.36082	1.02891e-05
Slc25a39	1.36061	6.52204e-09
A830010M20Rik	1.35949	2.87235e-07
Tmem256	1.35826	4.78275e-05
Wdr62	1.35825	2.0146e-05
Pdxp	1.35762	4.51466e-12
Uqcrc2	1.35733	5.32834e-05
Akr1e1	1.35645	0.00116754
Med30	1.35586	0.00218796
Snhg7	1.35578	1.15025e-07
Prdx4	1.35567	0.00135793
Hmbs	1.35522	1.16776e-09
Neil3	1.35502	4.1578e-09
Pycrl	1.35444	2.3191e-07
Pde2a	1.35357	5.24542e-12
Npm1	1.35355	0.000584001
Chd3os	1.351	0.000233787
1500012F01Rik	1.35005	8.82895e-08
Hist1h2bg	1.34866	0.00382741
Sephs1	1.34862	2.89936e-07
Gadd45gip1	1.34735	1.09689e-07
Snhg6	1.34663	0.000598573
Lsm7	1.34435	2.32898e-06
Calm3	1.34344	3.00792e-05
Nudt5	1.34297	5.72955e-05
Ndufa9	1.34039	4.24255e-05
Naa50	1.33779	8.38563e-06
Nme2	1.3373	0.000764252
Stra13	1.33648	1.49919e-05
Skida1	1.33607	0.0320976
Nhp2l1	1.33569	2.99348e-05
Tubg1	1.33328	3.57344e-10
Hypk	1.33322	2.03552e-05
Mrpl16	1.33304	5.90859e-08
Fam92a	1.33274	1.93466e-05
Magohb	1.33239	0.0208413
Rcn1	1.33203	6.31113e-07
Vdac1	1.33156	1.18739e-12
Cenpl	1.33147	0.000733117
Mrps14	1.33137	0.000193118
Cox6a1	1.331	3.7351e-06
Memo1	1.33091	0.0001494
Pdcd5	1.33021	2.34978e-07
Uqcr10	1.32998	6.38698e-05
Nol4l	1.32995	0.000146261
Slc25a5	1.32843	3.4766e-05
Eno1b	1.32764	8.06075e-07
Lrp5	1.32744	0.000340064
Metap2	1.32684	7.261e-10
Rpl34	1.32437	0.00446002
Gnl3	1.32381	2.31508e-11
Ftsj1	1.32251	5.10399e-08
Sept10	1.32165	0.0266368
Rpp30	1.32112	0.00185672
Dld	1.32097	1.3751e-05
Cops2	1.32078	0.000996631
Timm13	1.31994	1.62863e-09
Rnf7	1.31924	0.000244468
Fam60a	1.31878	1.45653e-05
Rwdd2b	1.31873	6.66377e-08
Mrpl2	1.31866	2.63621e-06
Gm10451	1.31687	0.00593936
Epb4.1l4a	1.31669	0.0235125
Celf4	1.31521	0.0238714
Hist1h4m	1.31488	0.00522189
Psma6	1.31387	4.11782e-06
Dscc1	1.31303	0.00259571
Suv39h1	1.31229	1.97944e-15
Ncapd3	1.31214	3.18335e-09
Plxnb2	1.31101	3.19836e-08
Sbf2	1.31063	4.49302e-06
Apex1	1.3095	3.42942e-05
Pogk	1.3087	2.36125e-10
Fanci	1.3087	1.98197e-11
Ipo7	1.30818	2.2435e-06
Bend3	1.30757	2.62675e-09
Bub3	1.30731	1.16355e-06
Vim	1.30678	4.88991e-06
Poc1a	1.30466	0.000167479
Pus1	1.3036	2.5442e-11
Cct6a	1.30314	2.80034e-05
Hes6	1.3014	4.31602e-08
Rqcd1	1.30067	5.43478e-09
Gm6654	1.30055	0.00112298
Sh3bgrl	1.30045	0.00956752
E130201H02Rik	1.29917	0.00381655
1700112E06Rik	1.29887	0.0419224
Polr2j	1.29792	3.03666e-06
Kti12	1.29769	6.03431e-09
Sec61b	1.29695	0.000908398
Eef2k	1.29688	4.05988e-10
BC055324	1.29641	1.32265e-08
Psma4	1.29512	0.000438684
Zbtb45	1.29416	2.65268e-06
Eri2	1.29264	7.17191e-06
Hsp90aa1	1.29215	0.00065001
Mrpl23	1.291	8.13672e-05
Rnaseh2a	1.29082	2.82211e-09
Zfp422	1.29044	1.37401e-06
Timm10	1.29032	2.37999e-05
Tomm6	1.28992	5.33494e-07
Dars	1.28975	3.68485e-05
Fam216a	1.28953	8.45215e-06
Tomm20	1.28826	0.000562249
Taf1d	1.28791	0.000233574
Gm15421	1.2867	0.00955612
2700094K13Rik	1.28525	0.000158463
Akip1	1.28489	0.00245318
Prdx2	1.28453	1.2686e-05
Slirp	1.2838	0.00193403
Taf9	1.28363	0.00021929
Nudt19	1.28362	1.77467e-05
Fgfrl1	1.28311	0.00437122
Phf5a	1.28085	1.78491e-07
Pigyl	1.28083	0.00423838
Stac2	1.28055	1.42404e-05
Kdelc1	1.2805	0.00140779
Gclc	1.28016	2.70531e-11
Snrpd2	1.27977	0.00140921
Mrps30	1.27929	6.23846e-10
Mrpl40	1.27923	3.97332e-06
Prdm16	1.27803	0.0252446
Akap17b	1.27788	1.00308e-09
Mphosph10	1.2775	1.2552e-05
Kifc5b	1.27716	4.02269e-05
Mdh1	1.27698	0.000349065
N6amt2	1.27677	0.00437731
Rnase4	1.27576	0.0302952
Snrpd3	1.27574	1.54066e-06
Etf1	1.27568	2.42627e-06
Zfp367	1.27547	0.00024269
Kpna3	1.27467	7.26204e-05
Wdr46	1.27454	8.34533e-09
Psmc6	1.27366	0.000583913
Eif5a2	1.27361	0.000254806
Lig4	1.27213	8.31714e-07
Ndufv2	1.27212	4.45517e-05
Fhit	1.27184	0.00115024
Rfc3	1.27139	0.000217139
Pfkm	1.27108	0.000191009
Gm13034	1.27073	0.0031318
Plp2	1.27064	1.6794e-09
Polr2d	1.27049	3.10726e-06
Prickle1	1.27016	0.0251055
Rcc2	1.26954	4.93853e-18
Apitd1	1.26914	0.000210324
Mrpl57	1.26738	3.46454e-08
Gas5	1.26737	0.000110278
Vbp1	1.26732	0.00446195
Wdhd1	1.26711	2.2186e-11
Gtpbp10	1.26672	0.000122895
Mrps5	1.26672	2.78128e-06
Rnf125	1.26628	0.0122911
Ndufs5	1.26622	0.00134001
Smtn	1.26388	0.00669751
Crip1	1.26359	0.00405661
Nhsl2	1.26349	0.000191009
Psma1	1.26347	0.00115169
Hist1h4h	1.26346	0.00669751
Yes1	1.26306	0.0155426
Tppp	1.2618	4.01856e-05
Nxn	1.26171	0.000138057
Gars	1.26148	2.60642e-19
Deptor	1.26144	4.37121e-06
Smarcc1	1.26102	7.9065e-13
Gspt1	1.26049	9.56072e-08
Set	1.25964	8.68117e-07
Arl5c	1.2592	6.12994e-09
Cdk2ap1	1.25846	1.63066e-07
Ubl4	1.25771	9.16465e-06
Spata7	1.25659	0.00714904
Gm13251	1.25587	0.0095105
Aimp2	1.25512	2.46838e-08
Grwd1	1.25477	1.64869e-11
Nudt21	1.25451	2.99348e-05
Psma5	1.25443	2.94272e-05
Ndufs8	1.25438	0.000159701
Ccdc86	1.25388	0.000189199
2700099C18Rik	1.25339	0.000300629
Dstn	1.25224	7.15878e-05
Dnmt1	1.25062	1.32694e-11
Ssna1	1.25019	7.51374e-05
Rpa2	1.25018	1.93466e-05
Mrpl22	1.24995	4.7454e-05
Nop2	1.24969	5.56939e-16
Tomm7	1.24805	0.00186576
Cox19	1.24765	7.96433e-05
L2hgdh	1.24762	4.15206e-05
Sdf2l1	1.24746	6.94004e-05
Pcbp1	1.2473	4.68696e-11
Rnmtl1	1.24637	5.33641e-08
Cct3	1.24627	8.33477e-07
Calr3	1.24557	0.0495364
Gclm	1.24533	1.75215e-05
Cct8	1.2439	5.7621e-07
Lmo4	1.24372	4.75954e-05
Adh5	1.24324	2.79851e-05
Suv39h2	1.24307	0.000486807
Btg3	1.24283	1.00464e-05
Prdm5	1.24282	0.0162876
Vma21	1.24198	1.84104e-05
Abce1	1.24133	7.51955e-05
Xpo1	1.23874	0.00107477
Gins3	1.23777	5.7621e-07
Pgls	1.23735	5.52557e-05
Fundc2	1.23713	0.000241177
Syncrip	1.23662	7.56566e-05
Atp1b3	1.23604	7.50084e-08
Mrpl35	1.23597	0.000452328
Psmc5	1.23496	4.25307e-06
Rfwd3	1.234	7.05479e-08
Slbp	1.23276	9.66332e-05
Tmem109	1.23222	4.65168e-09
Sf3b6	1.23214	0.000787577
Mrpl30	1.23182	0.000165464
Hsd17b10	1.23162	4.64036e-07
Fcf1	1.2313	4.11055e-05
Wdr34	1.23099	6.33865e-07
Mms22l	1.23064	8.86955e-14
Rgag4	1.23043	4.97909e-05
Ier5l	1.22962	0.0273049
Emc6	1.22881	2.03831e-05
Mrps24	1.2284	0.000165916
Tubb5	1.2273	0.000607886
Tmem147	1.22716	2.35829e-08
2410127L17Rik	1.22715	0.000342688
Fh1	1.22633	2.97313e-06
Hspa9	1.22597	1.90855e-09
Smim4	1.22478	0.000151103
Atp1b1	1.22474	3.48325e-05
Sumo2	1.22435	0.0053679
Extl2	1.22423	4.11055e-05
Ckap4	1.22397	2.05453e-06
Dbr1	1.22325	2.36599e-07
Exosc7	1.22261	4.02615e-08
Pgam1	1.22124	2.97534e-07
Brix1	1.22111	0.000383488
Snord104	1.22016	0.00343709
Chchd2	1.21828	0.000773006
Pgrmc1	1.21812	5.41306e-05
Pkd1l3	1.21798	0.000186414
Acad8	1.2178	0.000233413
Dazap1	1.21757	6.9943e-09
Sarnp	1.21724	0.000132095
Mrps26	1.21654	1.44555e-11
Eif2s2	1.21492	1.34202e-06
Arhgef39	1.2145	0.0064386
Nedd8	1.21377	2.62613e-05
Wdr76	1.21293	5.24575e-08
Nif3l1	1.21274	1.36154e-07
Zak	1.21233	1.62945e-09
Gm3258	1.21112	0.00358201
Frat2	1.2104	9.06731e-08
Gtf3a	1.21032	7.22492e-10
Samd1	1.20928	1.17252e-07
Hist1h3f	1.20913	0.00748168
Zfp934	1.20887	0.0419254
Sac3d1	1.2061	2.30726e-06
Lsm12	1.20582	2.43972e-05
Serinc5	1.20568	4.19683e-11
Fam96a	1.20514	0.000197956
Zfp947	1.20407	0.0242046
Whsc1	1.20063	2.50261e-11
Ncl	1.19933	8.42323e-13
Gtf2h5	1.19915	0.000680428
Ndufb11	1.19803	0.000814779
Aprt	1.19782	1.3216e-05
Ppm1e	1.19756	1.84029e-06
Cmpk1	1.19725	0.00503244
2410015M20Rik	1.19594	0.000498537
Rps6kl1	1.19574	0.0255349
Gemin4	1.19556	0.000755252
Polr1b	1.19505	3.29334e-17
Pla2g12a	1.19462	1.17969e-05
Cep76	1.19377	2.24801e-06
Fxn	1.19367	1.26093e-05
Nup43	1.19367	2.0885e-05
Rangap1	1.19346	2.90427e-14
Isoc1	1.19168	3.97842e-05
Prmt1	1.18969	6.14176e-08
Ssbp4	1.1895	1.23547e-08
Psmd3	1.18939	1.33529e-08
Asna1	1.18902	4.65485e-07
Hist1h1d	1.18854	0.00325756
Rbmxl1	1.18764	7.03379e-07
Morf4l2	1.18671	0.00105292
Psmd14	1.18612	9.23936e-06
Nudt2	1.18495	0.0137035
Arhgap23	1.18299	0.0047205
Pabpc4	1.18208	4.33123e-14
Naa20	1.18206	0.00392769
Slfn3	1.18172	0.000536015
Rbm44	1.18078	0.00499404
Mrpl41	1.17992	0.00192129
Sumo1	1.17956	0.0034367
Amotl1	1.17951	0.00540755
Shq1	1.17855	6.28693e-06
Cdca4	1.17743	1.0325e-06
Snrpe	1.17595	0.00146062
Rab26	1.17582	0.0195733
Aldh18a1	1.17539	1.91571e-09
Pkm	1.17465	0.000188573
Ppid	1.17443	1.06533e-06
Poldip2	1.17414	5.91609e-12
Polh	1.17381	1.13341e-06
Llph	1.17335	4.64637e-08
Ckap5	1.17279	4.04722e-07
Eif3e	1.17273	0.00279545
Hmgb1	1.17246	0.00312995
Tada2a	1.17171	5.01497e-05
Slamf7	1.17084	8.17342e-06
Hdac2	1.17045	3.98651e-08
Nup205	1.16991	8.26403e-08
Tmco1	1.16962	0.000649525
Smc3	1.16954	5.00252e-09
Nop56	1.16939	4.21006e-09
Snrpb	1.16879	5.3427e-06
1110001J03Rik	1.16816	0.00191718
Eif5a	1.16802	5.74655e-05
Mrps27	1.1679	0.000479554
Ssb	1.16746	0.000966154
Bri3bp	1.16742	9.34502e-12
Ift22	1.1674	8.09352e-07
Idi1	1.16724	0.00114542
Mrps12	1.16631	1.28949e-06
Ndufb8	1.16457	1.52944e-05
Cdc42ep4	1.16432	2.90432e-07
F2rl3	1.16344	0.0498249
Dna2	1.16324	5.82558e-05
E2f3	1.16295	1.60925e-09
Fasn	1.16291	1.94182e-15
Ndufb2	1.16246	0.00231621
Zbed3	1.16019	1.41517e-07
Mrpl11	1.15998	8.62977e-05
Uqcrfs1	1.1599	8.53639e-05
Eid2b	1.15968	0.0123588
Timm23	1.15952	8.9986e-05
Polr2i	1.15943	0.000197687
Ssrp1	1.1589	2.1363e-07
Prps1l3	1.1587	0.000208931
Hist1h2be	1.15831	0.00625717
Trim32	1.15803	6.7768e-06
Dsn1	1.15787	2.57188e-08
Klhl9	1.15692	0.00027844
Slc19a2	1.15549	1.84107e-05
Hmgn1	1.15508	0.000319989
Odc1	1.15413	0.000184334
Psmc3	1.15396	8.82497e-06
Snrpg	1.15392	0.00139881
Nadk2	1.15333	0.00298726
Itga5	1.15305	0.016564
Rrp9	1.15273	3.42854e-07
Polr1d	1.15268	3.40289e-05
Erf	1.15259	0.000432431
Yif1b	1.15224	0.000805235
Skp2	1.15164	7.13799e-07
Smim13	1.15019	1.403e-05
Arhgap33	1.14978	0.000548419
Bcl7a	1.14877	5.53057e-10
Cirh1a	1.14832	4.89425e-10
Gpt2	1.14826	0.00138779
Mllt4	1.14821	0.00127978
Hnrnpab	1.14688	4.44799e-08
Scrn3	1.14593	0.00130781
Dnajc15	1.1445	0.00912062
Rnf219	1.14348	1.93439e-09
Alg8	1.14341	4.36069e-05
Mrps17	1.1427	0.000589151
Pes1	1.14189	5.30876e-08
Dpy19l1	1.14163	1.05969e-06
Eif4e	1.14122	2.02702e-05
Raly	1.14109	2.61257e-06
Timm17a	1.1407	0.000658991
G2e3	1.14032	0.00328789
Peo1	1.13989	1.04536e-07
Pde5a	1.13925	0.00065001
Gja1	1.13886	0.0355272
Sdhb	1.13863	2.55468e-07
Dnajc8	1.13655	1.12766e-05
Hist1h2bc	1.13604	0.0131085
Mrps22	1.13595	3.43729e-05
Gng5	1.13513	0.0311893
Atp5l	1.13467	0.00911024
Skp1a	1.13433	0.00192784
Znhit3	1.13338	0.00509625
Dcbld1	1.1329	1.76451e-05
Dars2	1.13268	2.10702e-05
Hadh	1.131	2.16186e-10
Gm5801	1.13067	0.00828257
Polr2k	1.13065	0.0228042
Mir17hg	1.13057	0.00184
Pdha1	1.13017	5.3501e-06
Psmd12	1.12859	4.0275e-06
Acaa2	1.12799	2.36726e-08
Mrpl48	1.12721	0.00102057
Pde12	1.12691	3.18383e-05
Bag1	1.12639	9.18977e-10
Gm17296	1.12602	1.91542e-11
Mpst	1.12516	1.92246e-05
St3gal4	1.12481	0.000288522
Zfp599	1.12461	0.000112588
Wdr61	1.12405	3.66204e-05
Ipo11	1.12384	2.61805e-05
Psmg1	1.12338	0.000508992
Hist1h4d	1.12324	0.00829034
Ap3s1	1.1228	0.0116024
Zscan12	1.12238	0.000474171
Eif3b	1.12238	1.86062e-08
Mrpl19	1.12217	5.81886e-08
Smarca4	1.12142	3.23067e-09
Rsl24d1	1.12136	2.89698e-06
Mogs	1.12118	7.58916e-09
Snhg10	1.12076	0.0284451
Rps26	1.12058	0.001182
Gemin5	1.11744	1.42723e-11
Eprs	1.1162	4.34101e-08
Nup107	1.11603	1.51115e-09
Ndufa5	1.11581	0.00055442
Lxn	1.11562	0.00290774
Atp5g2	1.1156	0.00204535
Abcf2	1.11452	7.591e-07
Orc2	1.11445	5.23628e-05
Mrps18a	1.11367	9.01267e-07
Lgals9	1.11185	1.68182e-08
Tssc4	1.11123	6.99367e-07
Asf1a	1.11099	0.00280976
Mrps11	1.11099	0.000874426
Galnt7	1.10919	4.48895e-08
Neurl1b	1.10829	0.0290512
Slc39a6	1.10681	3.83189e-08
Rwdd1	1.10588	5.78649e-05
Cct5	1.10571	0.00101747
Ddx21	1.10534	6.41905e-09
Prpf19	1.10463	2.43331e-05
Ddx1	1.10411	1.49925e-06
Bhlhb9	1.104	0.000514176
Mdh2	1.10339	6.84087e-09
Exosc8	1.10316	2.45475e-05
Naa10	1.10261	1.62925e-10
Apip	1.10243	0.00679428
Gtf2h4	1.10223	9.18472e-06
Thoc3	1.10214	6.8811e-11
Gale	1.10196	7.30968e-06
Cox6b1	1.10127	0.00343768
Ppp1r8	1.10086	4.21867e-07
Umad1	1.1007	0.000577416
Ncbp2	1.09878	1.05992e-06
Psmb7	1.09775	0.000428535
Anp32a	1.09733	1.16642e-09
Msh2	1.09634	7.394e-10
1190007I07Rik	1.09471	0.000738528
Canx	1.09459	9.17524e-05
Haus2	1.09449	0.000942547
Gm10012	1.09437	0.0317665
Hmgb1-ps7	1.09427	0.00137002
0610010K14Rik	1.09423	2.4587e-05
Ssr2	1.09356	9.71363e-05
Psmd6	1.09339	0.000496691
Gk5	1.09313	0.000711851
Mphosph6	1.09219	0.0164494
Hddc2	1.09193	0.000365509
S100a10	1.09072	0.00195976
Cdc37	1.09027	1.10635e-06
Dnajb13	1.0895	1.52611e-05
Mmgt1	1.08946	0.00240084
Smdt1	1.08906	2.35301e-05
Mmachc	1.08898	0.00100807
Myadm	1.08885	1.43756e-05
Glo1	1.08865	0.000137491
Ak2	1.08836	1.2069e-13
Capn5	1.08778	9.27881e-07
Stoml2	1.08585	2.31459e-09
Caprin1	1.08571	0.000352669
Ptma	1.08551	0.00972438
Pop1	1.08539	5.76999e-07
Fam89b	1.08523	0.000215084
Tmem11	1.08509	7.80282e-06
Hist1h3e	1.0844	0.0165798
Trim28	1.0843	1.92008e-07
Eny2	1.08274	0.000282002
Ndufa2	1.08253	0.00233184
Psma3	1.0818	0.00190344
Ftsj3	1.08174	1.36087e-07
Rad23b	1.08073	0.000237195
Ppp1r3e	1.07988	0.0384432
Tmem14c	1.07988	8.69055e-05
Psmd1	1.07955	8.45409e-10
Vdac3	1.07809	7.00742e-05
Srsf1	1.0773	0.00556776
Serbp1	1.07503	0.000282235
Srp19	1.07486	0.000751751
Psma7	1.07448	0.000493716
Mrpl32	1.07446	0.00137966
Pin4	1.07424	0.00179342
Mrpl21	1.07413	0.000103761
Calm2	1.07395	0.012426
Foxred2	1.07333	1.16339e-06
Txndc17	1.07259	0.000192412
Ube2v2	1.07218	0.0172377
Xrcc1	1.07211	5.10898e-09
Dnah8	1.07209	0.000398301
Tomm70a	1.07186	0.000291098
Zfp955a	1.07184	0.00205029
Zbed4	1.07092	5.6794e-07
Acot6	1.07089	0.0485679
Nle1	1.07052	1.18165e-06
Atp13a3	1.07014	1.9065e-06
Stxbp1	1.06873	0.00201149
Pkp4	1.06842	7.47189e-05
Zfp930	1.0683	0.0169017
Zfp518b	1.06825	0.000612605
Ppif	1.06762	2.55468e-07
Plk2	1.06721	0.010241
Spryd4	1.06716	0.000148802
Ecsit	1.06681	1.93068e-09
Coq4	1.06679	0.000147284
Mybbp1a	1.06605	1.80484e-13
Dera	1.0657	0.000288604
Adss	1.06562	1.50275e-05
Eif3g	1.06532	4.728e-08
Mex3d	1.06507	6.34929e-05
Smc4	1.06398	9.82941e-05
Tbl3	1.0638	1.11064e-07
Phb2	1.06366	3.94702e-09
Larp7	1.06313	3.74894e-05
Acp1	1.06237	0.00180413
Rbmx2	1.06111	0.000286161
Rars	1.06098	4.05687e-08
Mrpl46	1.06037	0.000175326
Bst2	1.05997	0.00606963
Klf10	1.05991	0.000327524
Spn	1.0596	8.26545e-10
Ebna1bp2	1.05846	9.18977e-10
Psmg2	1.0584	7.37963e-06
Psph	1.05752	0.000164942
Tefm	1.05724	0.00700501
H2afv	1.05686	1.50283e-05
Cox5b	1.0555	0.000282695
Aurkaip1	1.05531	0.000739958
Ethe1	1.05504	7.37121e-05
Ubl5	1.05503	0.000585204
Mpp6	1.05501	5.08749e-06
Acads	1.0544	8.89293e-05
Ndufs4	1.05412	0.00221741
Aldh9a1	1.05402	1.05464e-07
B3galt6	1.05402	1.85032e-05
Cmss1	1.05378	6.67586e-05
Heatr3	1.05335	1.45695e-08
Cisd1	1.05327	4.65851e-05
Gar1	1.0532	0.00025508
Rpl22l1	1.05291	0.0196106
Ostc	1.05264	0.00760961
Smarce1	1.05188	7.36855e-09
H2afj	1.05145	9.85715e-09
Slc27a3	1.05138	0.00789468
Eri1	1.05119	9.38569e-05
Timm21	1.05108	0.00271035
Rbbp4	1.05091	0.000604294
Ccne1	1.05017	1.13837e-08
Lbr	1.04946	8.14554e-05
Pfdn1	1.04902	0.000283021
Coa3	1.0489	0.000623365
Nuak1	1.04788	0.00239101
Abhd17c	1.04785	0.000611042
March8	1.04763	0.00160432
Mthfd1l	1.04754	1.22432e-12
Mrpl42	1.04701	0.000309318
Romo1	1.04688	0.000182147
Otud6b	1.04311	0.003065
Tmem261	1.04266	5.26271e-05
Thumpd1	1.04223	1.63137e-06
Lsm4	1.04212	1.85331e-05
Zbtb8os	1.04172	0.0189021
Eif3j1	1.04	0.000286161
Psmb1	1.03999	0.00275346
Cd24a	1.03842	0.0108579
Mrpl9	1.03762	2.94272e-05
Znf41-ps	1.03686	0.00326722
Aimp1	1.03673	4.23918e-05
Slc43a1	1.03431	2.58978e-06
Arid3a	1.03413	9.73448e-12
0610010F05Rik	1.03349	0.00959629
Jade3	1.03239	0.000163264
Dis3	1.03218	1.05165e-09
Gm13238	1.03195	0.0113936
Ywhae	1.03183	1.19364e-06
Bak1	1.03084	2.65682e-08
Ndufa10	1.03051	1.88567e-06
Pllp	1.03031	0.0444143
Hist1h4c	1.02836	0.0220181
Ndufab1	1.02782	0.000693829
Hlx	1.02759	0.00747503
Trib2	1.02699	1.75601e-07
Stambpl1	1.02698	4.32156e-06
2700060E02Rik	1.02602	0.000301617
Cox8a	1.02448	0.0124083
Ift74	1.02438	0.0324405
Atp5b	1.02256	0.000981605
Mrpl54	1.0209	0.0018578
Ndc1	1.0204	0.00554075
Atad3a	1.01941	7.40331e-08
Slc25a15	1.01917	1.56006e-05
Tmpo	1.01884	0.00117665
Dph3	1.01832	0.0018234
Rfxap	1.01746	0.000388469
Api5	1.01629	0.000397388
Ssx2ip	1.01474	0.00316202
Fkbpl	1.01404	0.0344822
Vps35	1.01403	0.00302838
Smc1a	1.01376	1.07039e-09
Snhg8	1.01347	0.00111646
D030056L22Rik	1.01222	0.00760678
Ppm1g	1.01201	1.59383e-07
Haus3	1.01147	0.0155118
Nip7	1.01083	0.00109662
Exosc9	1.01012	0.000154881
Eif1ad	1.00981	7.20274e-08
C230052I12Rik	1.00975	2.43643e-05
Epn2	1.00955	0.00202359
2700089E24Rik	1.00951	0.00586261
Ammecr1	1.00949	4.27608e-06
Mrpl52	1.00911	0.000191869
Ahsa1	1.00888	1.50488e-05
Fem1b	1.00827	6.78103e-07
Wdr5	1.00746	1.50684e-10
Atp5a1	1.00654	0.00138313
Snora2b	1.00642	0.0340661
Psmb2	1.00588	3.57516e-05
Arl6ip4	1.00539	1.30021e-06
Slc25a17	1.00531	0.000340468
Abcb8	1.00503	1.22792e-05
Atp5j2	1.0046	0.00370775
Rnps1	1.00457	1.64751e-10
Gtf2f1	1.00424	1.71053e-06
Igf2bp3	1.00384	4.4199e-08
Dtymk	1.00382	3.5952e-09
Lrrc8b	1.00352	0.00197098
Psmb6	1.0035	0.00378338
Mcm8	1.0033	0.00420766
Hn1l	1.00282	2.44024e-06
Dck	1.00262	4.47463e-07
Acbd6	1.0022	0.000228125
Tsen2	1.00212	0.00322121
Pidd1	1.00189	0.000902485
Eif3i	1.00181	0.000915615
Ampd2	1.00102	8.67327e-11
Exosc2	1.00094	2.51544e-08
Shfm1	1.00076	0.00922298
Nsmce4a	1.00048	0.00304167
Aven	1.00041	2.56875e-05
Acaca	1.00034	1.39742e-15
Ppie	1.00032	4.65303e-05
C030006K11Rik	1.00028	0.000944581
Pdcd6	0.999995	2.64619e-05
Rnf126	0.999937	2.96146e-05
Itpa	0.999602	0.0040936
Rpn1	0.998498	0.000301617
Mrps2	0.99787	3.11397e-07
Etfb	0.997436	0.000155024
Rrp15	0.997305	2.1179e-05
Bzrap1	0.996164	0.000821202
Eif6	0.995016	3.67153e-07
Efcab7	0.994987	0.0408787
Rps16	0.994814	0.049529
Asrgl1	0.99467	4.63047e-07
Eif2a	0.994266	0.000211574
Uqcrb	0.993752	0.0075884
Cercam	0.993577	0.048759
Maz	0.993546	1.78167e-09
Xpot	0.992577	2.50887e-09
Desi1	0.991774	3.8585e-06
Ywhaq	0.991136	0.00149818
Gstt2	0.989048	7.61359e-05
Psma2	0.988808	0.00729715
Cct2	0.988735	0.000174153
P4hb	0.987562	2.66476e-05
Eif3m	0.987551	0.00759122
Nup155	0.987532	3.25285e-06
Eif2s3x	0.987439	0.000732302
Ywhah	0.987403	7.28661e-05
Ccdc107	0.98723	0.000759708
Isyna1	0.986554	4.56254e-09
Krtcap2	0.986369	0.0046753
Atp5c1	0.985359	0.000683236
Coro1c	0.985298	7.19141e-09
Cetn2	0.985194	0.00342882
Rrp7a	0.984771	1.00087e-07
Mydgf	0.984695	4.40264e-05
Armc6	0.984203	0.000799114
Psmb4	0.983814	0.00493659
Sdhc	0.983558	0.000238492
Ndufa7	0.982984	0.000138954
Mfsd7b	0.982218	0.00513299
Timm8b	0.982208	0.00411282
Sf3b4	0.981003	4.68929e-06
Lamtor5	0.980202	0.00580553
Dcakd	0.98009	0.000106048
Mrpl47	0.979898	0.0171138
Hsp90ab1	0.979663	0.000297489
2610301B20Rik	0.979475	0.0129479
E130309D02Rik	0.97883	9.85956e-06
Tcp1	0.978753	0.00261077
Aamdc	0.977668	0.0221071
Snrnp35	0.977539	0.00457775
AI506816	0.97656	0.000236
Brcc3	0.976361	0.00338305
1110004F10Rik	0.975665	0.000387893
Ube2m	0.974521	1.24707e-05
Ccdc38	0.973584	0.0238395
Snord55	0.973117	0.0258543
Gm5148	0.973055	0.0425396
Brca2	0.972924	0.0010986
Mrpl51	0.972891	0.00338613
Nsa2	0.970325	0.000955094
Ndufb7	0.970114	2.91903e-07
Kcnab2	0.96997	1.27702e-10
Nap1l1	0.969795	7.49601e-05
Spcs1	0.969351	0.0271204
Ndufb3	0.967901	0.00187936
Terc	0.967822	0.00652067
Cyc1	0.967276	8.20386e-07
Mrrf	0.967224	0.00207715
Smim15	0.967086	0.0149195
Imp3	0.967033	4.24255e-05
Ak3	0.966637	1.64664e-07
Hist1h1e	0.965591	0.0207645
Mex3b	0.965138	0.00471802
Rexo2	0.96502	0.00150287
Sigmar1	0.964886	0.00267874
Dohh	0.964845	0.000154355
Cep128	0.964789	2.92689e-05
Cct7	0.964091	8.32457e-07
Mrpl28	0.963863	3.5877e-07
Kpnb1	0.963024	2.0511e-09
2310061J03Rik	0.96241	0.0164992
Airn	0.960794	0.0489521
Srsf2	0.960378	2.696e-07
Psmc2	0.960244	5.87532e-05
Rpp40	0.95937	0.00517522
Zfp64	0.958811	2.89698e-06
Dnajc2	0.958476	2.22475e-05
Bcas2	0.957254	5.53109e-05
Itgb1	0.957014	1.9978e-05
Qdpr	0.956405	0.000112883
Sep15	0.956156	0.00758162
Rgs12	0.955538	0.00248005
Anapc15	0.955451	0.00147245
Hnrnpa0	0.955376	2.74925e-06
Pop4	0.955265	0.00117562
Tra2b	0.955216	0.000814779
Gm5643	0.954159	0.00192295
Nkrf	0.95301	0.000710912
Blmh	0.952828	1.66836e-06
Trmt112	0.952014	1.62856e-05
Eif3l	0.951366	3.28535e-10
Itgb3bp	0.95136	0.0246702
Knop1	0.951286	3.13502e-10
Bckdha	0.950895	0.00483413
Cuta	0.950379	1.98414e-06
Mtpn	0.948473	0.00282011
D2Wsu81e	0.948449	3.27209e-05
Mak16	0.948126	0.000194325
Zfp72	0.948061	0.0475205
1110065P20Rik	0.947649	0.0469502
Cnpy2	0.947218	0.000420886
Gpatch4	0.946936	5.50023e-06
Them6	0.946695	4.53488e-09
Fam20b	0.945728	1.23257e-08
Denr	0.945657	1.2686e-05
Eif4a1	0.94556	0.00185774
Hnrnph2	0.944885	0.00205871
Cenpq	0.944777	0.00888008
Parp12	0.943485	0.0343382
Ahnak	0.943445	1.45513e-10
Rabggtb	0.942407	1.60401e-05
Atp5f1	0.942179	0.00747422
Rbm8a	0.941372	6.383e-05
2700081O15Rik	0.940339	1.35448e-06
Zgrf1	0.939458	0.000623244
Hat1	0.938922	0.00233773
Psmd13	0.938685	0.000103761
Mrps21	0.937846	0.0034432
Zranb2	0.93745	0.00301977
Mien1	0.937397	0.000798998
Ccp110	0.937061	1.17756e-05
Ddt	0.936923	0.0228896
Abracl	0.936747	0.0325987
Amd1	0.936319	0.000737733
Fam103a1	0.936281	0.00644811
Cse1l	0.934363	0.000668388
Mcph1	0.934224	3.95761e-08
Zkscan17	0.934171	0.000127048
Ipmk	0.933124	9.98067e-09
Tigd5	0.932937	0.00311269
Pecr	0.932785	0.016285
Atad1	0.932732	0.00566787
Tube1	0.932175	0.000823503
Aarsd1	0.931463	4.03139e-06
Rmdn3	0.930755	3.43729e-05
Suz12	0.929954	0.00122596
Myo19	0.92957	9.04424e-05
Il1rap	0.929442	0.00199158
Usp46	0.929328	0.00898464
Nt5c	0.928544	0.00188167
Grpel1	0.928226	0.000479955
Lman1	0.928174	0.000158535
Thap11	0.928046	1.13368e-05
Gm3219	0.927782	0.026727
Bola2	0.927059	0.0023807
Cops3	0.926987	0.0033026
Mettl13	0.925793	7.99453e-08
Dhrs4	0.925637	0.00400612
Snhg12	0.924843	0.00164418
Npc2	0.923811	0.000429547
Nnt	0.923777	1.18004e-05
Pgd	0.922418	0.000292223
Ube2l3	0.922192	1.43008e-07
Slc25a32	0.921946	0.00582687
Chac2	0.921243	0.0311534
Supt16	0.920702	2.39867e-11
Tdg	0.920538	1.32153e-09
Lpcat4	0.920373	0.0115391
Ndufb9	0.920097	0.000157851
Pdss1	0.91964	0.000789414
Seh1l	0.919632	7.29921e-05
Lrrc58	0.919454	1.94467e-07
Suclg2	0.918536	4.31944e-05
Cchcr1	0.918164	0.0124986
Impad1	0.918022	0.000651759
Rbm17	0.916876	8.79744e-06
Nudt3	0.916071	8.43658e-07
Adamts14	0.915747	0.0081464
Edem3	0.915082	9.32078e-10
Celsr1	0.915056	0.00369842
4933404O12Rik	0.91473	0.00171662
Dnaja2	0.914624	0.000179272
Rbfa	0.912505	6.57756e-07
Il7r	0.912095	0.0243171
Taf5l	0.910887	1.03935e-06
Rfc5	0.910711	2.56825e-06
Ccdc90b	0.908675	0.0492306
Ift122	0.908646	0.0282753
Slc12a3	0.908438	0.034675
BC003965	0.908393	0.000611102
Vdac2	0.908089	0.000536431
Gtf3c4	0.907239	8.85863e-13
Adssl1	0.90703	0.025755
Uba2	0.906564	0.000172221
Akt1	0.906551	6.63885e-08
1810022K09Rik	0.906527	0.0397854
Sod2	0.906348	4.90296e-06
Yae1d1	0.906315	0.00105287
Cnbp	0.906062	0.00306304
1810043H04Rik	0.905069	0.0149144
Aldh2	0.904982	1.81122e-08
Eif3d	0.904913	3.18001e-09
Tusc1	0.904697	0.0404051
2610002M06Rik	0.904383	0.00625364
Acat1	0.903896	6.77923e-05
Adi1	0.903419	0.000410819
Rab9	0.902863	0.00406821
Cul4b	0.902526	0.00312477
Wdr43	0.902176	4.16011e-05
Ctu1	0.90189	0.000267939
Bzw1	0.90167	0.0131281
Eif3h	0.900605	7.98224e-07
Pgm1	0.900263	0.00737537
Myeov2	0.89999	0.00606963
Cdc7	0.899587	0.000408873
Psmg4	0.899532	0.00106992
Eif4a3	0.898855	2.28777e-05
Lphn1	0.898553	0.00164072
Dnajc9	0.898538	0.000267939
Chordc1	0.898077	0.0162516
Inafm2	0.897472	7.37121e-05
Atg101	0.897128	0.000129193
Pdcd2	0.896709	4.5861e-06
Ankrd37	0.896362	0.0380216
Ppm1f	0.896134	1.92811e-08
Prpf31	0.895852	2.50076e-07
Ppp1cc	0.895515	0.00428984
Thoc7	0.895282	0.00318764
Dnttip2	0.895017	0.00032459
Gtf2f2	0.894686	0.000203935
Nono	0.894442	0.00112536
Uqcrc1	0.893911	5.53357e-08
Nrxn1	0.893798	0.0340505
Actl6a	0.893423	1.44386e-06
Txn2	0.892778	0.0139049
Mrps34	0.892552	0.0312163
Gpd1l	0.892349	0.00013576
Gm1821	0.892041	0.0335296
Gnb1l	0.891801	0.00330286
Cst3	0.891769	0.00240084
Yars	0.891721	4.989e-06
Pccb	0.891715	0.00228464
Rfx2	0.891515	0.0267096
Rps19bp1	0.88991	0.000281272
Etfa	0.88963	0.00259475
Ptbp1	0.889565	0.000599987
1190002N15Rik	0.889233	0.00557363
Ubqln4	0.8888	3.01647e-07
Efr3b	0.88868	0.0186791
Sf3a3	0.888362	7.8356e-06
Fam122b	0.887925	0.00195716
Vkorc1l1	0.887528	0.00726645
Deb1	0.887338	0.0286514
Hyal2	0.886901	0.00827176
Commd1	0.886476	0.00299473
Spr	0.886196	0.0168634
Sub1	0.88604	0.02296
Tfdp2	0.885935	4.82084e-07
Atp5e	0.885157	0.00172595
Zfp958	0.884806	0.0373098
Srsf3	0.884802	0.0155586
Apobec1	0.884687	0.000609386
Emb	0.884171	0.0305341
Fdx1	0.884055	0.00815953
Polr1c	0.883665	3.14353e-06
Rbm15b	0.883635	1.2798e-10
Wdr36	0.883546	0.000586782
Bysl	0.883162	3.00773e-05
Doc2a	0.88267	0.000840541
Mgme1	0.882565	0.00134001
Rmi2	0.881617	3.98119e-05
Snora43	0.880931	0.000956221
Vps36	0.880613	0.000578165
1700017B05Rik	0.880411	1.86664e-06
Snrnp40	0.879459	1.08952e-05
Mtch1	0.878657	4.3939e-08
Ncbp1	0.877848	6.68569e-06
Pnpo	0.876701	4.51871e-05
Isoc2a	0.876697	0.000287789
Sumo3	0.875675	0.000233255
Gm15455	0.875502	0.00953981
Smn1	0.873744	4.43909e-05
Rbm3	0.872882	0.0269107
Ict1	0.872504	3.98967e-05
Gapdh	0.871936	0.0056869
Wdr18	0.871816	1.11047e-09
Uqcc3	0.871618	0.00548458
Mdm1	0.871606	0.00135349
Usp39	0.871556	0.000201973
Cops6	0.871269	8.87196e-05
Tsr2	0.87095	0.00119735
Cep164	0.869407	1.3335e-05
Twistnb	0.869123	0.00917851
Slc16a13	0.868692	0.0139063
Atp5h	0.868664	0.00471802
Ndufv1	0.868376	4.12109e-05
Mzt1	0.86816	0.0192784
Zfp629	0.868116	0.000110576
Cluh	0.866171	5.6432e-07
Cct4	0.866137	0.0011096
Vps29	0.866064	0.00768326
G3bp1	0.865523	0.000422601
Coil	0.865498	0.00184105
Ift57	0.865254	0.0406655
Msl3	0.865162	0.00491214
Otub1	0.864773	5.73377e-07
Wdr74	0.864467	2.5199e-06
Palb2	0.864401	0.000170859
Net1	0.864266	3.80014e-08
Apool	0.863835	0.0269132
Trim27	0.863175	8.67643e-08
Mtap	0.863079	0.00363028
Mrps6	0.862396	0.0228483
Cnih1	0.86228	0.000720478
Gadd45b	0.861684	0.000176513
Alg5	0.8612	0.00186901
Psmd2	0.860952	3.29064e-06
Mrfap1	0.860774	0.00102048
Dr1	0.860502	0.00857935
Imp4	0.86016	1.27044e-06
Mrpl38	0.859214	8.94983e-07
Ppp2ca	0.858441	0.000809706
Comtd1	0.858363	0.00143031
Snx10	0.858057	0.014979
Noc4l	0.857977	9.84627e-06
Plcd3	0.857092	0.000418438
Dlat	0.857048	3.85228e-06
Slc35a4	0.855902	0.000582568
Ccng1	0.85519	0.0130866
D8Ertd738e	0.855176	0.000439257
Mcts1	0.855061	0.0102905
Tdp1	0.854914	3.0717e-05
Slc36a4	0.854233	0.00459393
Xk	0.853886	0.0124585
Higd2a	0.853729	0.000401542
Prkcsh	0.853646	0.00227717
Abcb4	0.853261	0.00625797
Bop1	0.853155	3.59494e-09
Plekhf2	0.852871	0.00236412
Rbbp8	0.852693	0.000580467
Nde1	0.852553	2.59143e-05
Ten1	0.852551	0.0180514
Chst12	0.851809	0.00469291
Wdr75	0.851062	0.000107109
Plrg1	0.849924	0.000531653
Pwp1	0.849876	0.000160575
Ttf2	0.849785	1.3568e-08
AI662270	0.848434	0.00568757
Gemin8	0.848351	0.0031313
Slc1a5	0.848173	0.000496053
Esd	0.847707	0.0198776
[truncated: 3,471 more rows]

## Sheet: (F) T-KO_vs_T-WT
GeneSymbol	log2FoldChange	padj
Camkv	2.57704	8.30255e-08
Tdrkh	2.48789	2.20609e-07
Magi1	2.34521	1.35416e-05
Trio	2.34397	5.04179e-08
Pcbp3	2.31411	2.27588e-06
Neto2	2.18321	1.96103e-06
Nav2	2.17059	6.77214e-07
Klhl22	2.16476	8.58966e-09
Hook1	2.13905	2.20609e-07
Pllp	2.09801	6.52571e-05
Enpep	2.06704	0.000464578
Mapk12	2.03214	6.83069e-05
Nkpd1	1.89847	0.000823793
Ccdc85c	1.75454	0.00332915
Rpp25	1.7381	0.00906031
Cntln	1.62818	0.0146987
Bhlha15	1.61959	0.00502537
Sox4	1.60776	0.00620128
Pcdhga12	1.59372	0.0107062
Grrp1	1.59147	0.0219813
Tnfrsf19	1.5888	0.00944876
Syce2	1.58872	1.96103e-06
Tnrc18	1.56489	7.93381e-06
Znrf1	1.56017	4.68172e-06
Lef1	1.54614	0.0114095
Zhx2	1.52361	0.000407073
Celsr1	1.49262	0.00362556
Chd3os	1.48902	0.011074
Pogk	1.47398	3.61343e-08
Kcns1	1.468	0.0342957
Gm595	1.46752	0.0385227
Gal3st1	1.46657	0.0434189
Vegfa	1.46596	0.000407073
Jag1	1.4636	0.0446212
Mapk11	1.46056	0.00836639
Usp44	1.4474	0.0230412
Ptprs	1.4381	1.76253e-06
Qrfp	1.42011	0.0303337
Mical3	1.3844	0.0219813
Nckap5l	1.36061	0.00502537
Ccdc40	1.34764	0.0104968
Rapgef3	1.33847	0.0425147
Nefh	1.3007	0.0338649
Whrn	1.29312	0.0463095
Bcr	1.28707	0.0446212
Ptpdc1	1.27219	7.34815e-05
Mfsd2a	1.26408	0.0163365
Phldb3	1.19701	0.0425147
Rcor2	1.19228	0.0299168
Tcam1	1.16719	0.0162484
Plekhg3	1.14492	0.0307334
Mex3a	1.09496	0.0307334
Pkd1l3	1.09111	0.0296948
Xylb	1.08448	0.0342957
Zcchc3	1.08317	0.032987
Fbxl12	1.05556	0.0414087
Deaf1	1.02915	0.00459303
E2f6	1.00282	0.0355806
Rnf157	0.963048	0.00675292
Spint2	0.961174	0.0484137
Foxp4	0.957951	0.0342957
Igf2r	0.953062	1.40192e-05
Inafm2	0.930565	0.0231153
Mprip	0.923866	0.0229882
Baiap2	0.905648	0.0499698
E130308A19Rik	0.884888	0.0219813
Asap1	0.881127	0.00895421
Anks1	0.869166	0.00425663
Wdtc1	0.867892	0.0307334
Prkar2a	0.866346	0.00354383
Eef2k	0.843567	0.0299168
Gm17296	0.833759	0.0186
Kcna3	0.825817	0.0186
Dyrk2	0.813396	0.0426706
Zfp623	0.801766	0.014147
Dock9	0.750064	0.0396633
Poll	0.732323	0.0499698
Kif13b	0.729971	0.0299168
Drosha	0.718913	0.0315779
Hipk2	0.688461	0.0425147
Ctdp1	0.668117	0.00332915
Ercc3	0.660165	0.0342957
Arid1b	0.591211	0.0307334
Mga	0.522888	0.0425147
Irf5	-0.54742	0.0217316
Zfp51	-0.759506	0.0414087
Txndc16	-0.825795	0.0249169
Fam69a	-0.873345	0.0307065
H2-DMb1	-0.893253	0.0425147
Pycard	-0.899098	0.0425147
Smim13	-0.907433	0.0126102
Sgk3	-0.942839	0.0159301
Creg1	-0.943327	0.0397981
Zfp53	-0.949715	0.0216795
Samd9l	-0.983001	0.00413744
3110057O12Rik	-1.00615	0.0425147
Stx7	-1.05888	0.0105429
Lmo2	-1.07199	0.0481406
Plekhm3	-1.09594	0.0499698
Rnf13	-1.10712	0.0167426
Nacc2	-1.15531	0.0314339
Dram2	-1.20104	0.0307334
Ctsh	-1.20799	0.0425147
A630033H20Rik	-1.22186	0.0217316
Scpep1	-1.22561	0.0342957
Neurl1b	-1.24461	0.0481406
Btla	-1.24914	0.00701315
Tlr9	-1.25473	0.0307334
Nxt2	-1.28595	0.0209197
Sp140	-1.29232	0.0214986
Pkib	-1.29969	0.0369818
Cldnd1	-1.3022	0.0307334
H2-DMa	-1.30893	0.000716504
Zmat3	-1.31575	0.0126102
Auh	-1.35126	0.0342957
Cd180	-1.35178	0.0059295
Ly6d	-1.3616	0.0307334
BC064078	-1.38625	0.0499698
Cdk14	-1.43	0.0342957
Slc39a4	-1.44287	0.0446212
Bbs2	-1.46029	0.0355806
Ppfia4	-1.47049	0.0307334
Cd36	-1.47241	0.0342957
Padi2	-1.47626	0.00360044
Cd59a	-1.47706	0.0307334
Cpeb2	-1.47934	0.0307334
Il17rb	-1.4798	0.00949064
Eml6	-1.48068	0.0152361
Creb3l2	-1.48977	0.0342957
Rnd3	-1.49438	0.0326722
Slc7a3	-1.51145	0.0342957
Ltbp2	-1.52012	0.0342957
Zfp760	-1.53022	0.00357131
1700025G04Rik	-1.54218	0.014147
Asph	-1.55083	0.0303337
Naalad2	-1.55343	0.0271547
Ell2	-1.55715	0.0226955
Slc41a2	-1.57921	0.0219813
C130026I21Rik	-1.59087	0.0152361
Fmnl2	-1.61018	0.0159301
Tenm4	-1.62096	0.0199976
BC147527	-1.62148	0.0198063
B020031M17Rik	-1.62878	0.0182473
Gm7609	-1.62976	0.00332915
Avil	-1.64787	0.0163814
Pard3b	-1.64855	0.00948912
Rnase6	-1.67698	0.00453799
Pdzd4	-1.68588	0.00974715
Myadm	-1.70863	0.0031836
Wfdc21	-1.71006	0.00620128
Espnl	-1.71426	0.00974715
Zfp52	-1.72275	0.000153118
Lifr	-1.75425	0.00789539
Lrtm2	-1.78074	0.00642439
Klhl41	-1.81849	0.00400843
F2rl3	-1.86817	0.00332915
Arhgap5	-1.91977	0.00074788
Raph1	-1.92289	0.00198981
Sh2d1b1	-1.93753	0.00201294
Ak8	-1.96364	0.00157647
A530032D15Rik	-1.96716	0.000431757
Trpm5	-1.97162	0.00152479
Rab30	-1.99532	0.0011807
Ppfibp1	-2.03358	0.000106372
Lphn2	-2.38321	1.11711e-05
